# Supplementary material for: A versatile type VI CRISPR-based approach for targeted m 6 A demethylation in mRNAs
Source: HighWire-hosted journal article supplement (doi:10.1101/gr.280476.125), 2025-12-11
Supplement: Supplemental_Table_S1.xlsx [file Supplemental_Table_S1.xlsx]

## Sheet: Highly confident m6A sites
Supplemental Table S1. Detailed list of the highly confident m6A sites that were detected with direct RNA sequencing on HeLa transcriptome.
Gene	Chromosome	Start coordinate	End coordinate	Strand	Transcript_id	Transcript_position	Genomic Coordinate	Region	kmer	Reads	Stoichiometry	Probability	DRACH	RMBase v.3.0	m6A in miRNA target sequence
ACADM	NC_000001.11	75724709	75763679	+	NM_000016.6	1303	75762721	CDS	AGACT	19	0.315789	0.999969	YES	YES	NO
ACADVL	NC_000017.11	7219938	7225266	+	NM_000018.4	877	7222254	CDS	GGAGA	60	0.765957	0.999918	NO	NO	NO
C3	NC_000019.10	6677704	6720650	-	NM_000064.4	4905	6678158	CDS	GAAGC	25	0.75	0.999954	NO	NO	NO
CST3	NC_000020.11	23633657	23637955	-	NM_000099.4	608	23633842	3' UTR	GGACT	186	0.476471	0.99996	YES	YES	NO
COL5A1	NC_000009.12	134641803	134844843	+	NM_000093.5	6257	134842658	3' UTR	GGACT	22	0.636364	0.999981	YES	YES	hsa-miR-34a-5p
COL5A1	NC_000009.12	134641803	134844843	+	NM_000093.5	6271	134842672	3' UTR	GGACA	27	0.769231	0.999993	YES	YES	NO
COL5A1	NC_000009.12	134641803	134844843	+	NM_000093.5	7890	134844291	3' UTR	TGACT	14	0.846154	0.999981	YES	YES	NO
COL5A1	NC_000009.12	134641803	134844843	+	NM_000093.5	7953	134844354	3' UTR	GGACT	17	0.882353	0.999997	YES	YES	hsa-miR-454-3p
CPT2	NC_000001.11	53196824	53214197	+	NM_000098.3	2042	53213540	CDS	GGAGA	23	0.944444	0.999948	NO	NO	NO
CPT2	NC_000001.11	53196824	53214197	+	NM_000098.3	2418	53213916	3' UTR	AGACT	27	0.545455	0.999922	YES	YES	hsa-let-7g-5p
TOR1A	NC_000009.12	129812942	129824136	-	NM_000113.3	1426	129813596	3' UTR	AGAGA	37	0.969697	0.999945	NO	NO	NO
TOR1A	NC_000009.12	129812942	129824136	-	NM_000113.3	1428	129813594	3' UTR	AGACT	32	0.9375	0.999995	YES	YES	NO
TOR1A	NC_000009.12	129812942	129824136	-	NM_000113.3	1497	129813525	3' UTR	AGACT	13	0.923077	0.999905	YES	YES	hsa-miR-27b-3p hsa-miR-27a-3p
EXT1	NC_000008.11	117794490	118111826	-	NM_000127.3	3198	117799535	3' UTR	GGACT	23	0.7	0.999995	YES	YES	hsa-miR-138-5p
EXT1	NC_000008.11	117794490	118111826	-	NM_000127.3	702	118111125	5'UTR	GGACT	8	1	0.999964	YES	YES	NO
FECH	NC_000018.10	57544377	57586702	-	NM_000140.5	1511	57550555	3' UTR	GGACT	8	1	0.999964	YES	YES	NO
FXN	NC_000009.12	69035752	69079076	+	NM_000144.5	627	69072725	CDS	GGACT	16	0.5	0.99994	YES	YES	hsa-miR-7-5p
GBA1	NC_000001.11	155234452	155241249	-	NM_000157.4	2126	155234617	3' UTR	AGACT	9	0.888889	0.999928	YES	NO	NO
GCDH	NC_000019.10	12891160	12899999	+	NM_000159.4	1516	12899663	3' UTR	AGACA	14	0.642857	0.999921	YES	YES	NO
GLA	NC_000023.11	101397803	101407925	-	NM_000169.3	1220	101397901	CDS	GGACT	55	0.520833	0.999964	YES	YES	NO
ICAM1	NC_000019.10	10271120	10286615	+	NM_000201.3	1881	10285529	3' UTR	AGACT	12	0.416667	0.999911	YES	YES	hsa-miR-21-5p hsa-miR-21-5p
ICAM1	NC_000019.10	10271120	10286615	+	NM_000201.3	2020	10285668	3' UTR	AGACT	9	1	0.999972	YES	YES	hsa-miR-21-5p hsa-miR-21-5p
ICAM1	NC_000019.10	10271120	10286615	+	NM_000201.3	2045	10285693	3' UTR	ATAGA	14	0.846154	0.999942	NO	NO	hsa-let-7i-3p hsa-let-7f-2-3p hsa-miR-21-5p hsa-miR-21-5p
ICAM1	NC_000019.10	10271120	10286615	+	NM_000201.3	2047	10285695	3' UTR	AGACA	14	0.785714	0.999987	YES	YES	hsa-miR-221-3p hsa-let-7i-3p hsa-let-7f-2-3p hsa-miR-221-3p hsa-miR-222-3p hsa-miR-221-3p hsa-miR-21-5p hsa-miR-21-5p
LIPA	NC_000010.11	89213572	89251775	-	NM_000235.4	1248	89214820	3' UTR	GGACT	11	0.636364	0.99997	YES	YES	hsa-miR-26b-5p
NAGLU	NC_000017.11	42536241	42544449	+	NM_000263.4	1717	42543691	CDS	GGACC	14	0.428571	0.999972	YES	YES	hsa-let-7a-5p hsa-let-7b-5p hsa-let-7c-5p hsa-let-7e-5p hsa-let-7a-5p hsa-let-7b-5p hsa-let-7c-5p hsa-let-7e-5p hsa-let-7a-5p hsa-let-7c-5p hsa-let-7e-5p hsa-let-7c-5p
NAGLU	NC_000017.11	42536241	42544449	+	NM_000263.4	2002	42543976	CDS	GGACT	15	1	0.999974	YES	YES	NO
PEPD	NC_000019.10	33386950	33521791	-	NM_000285.4	1688	33387169	3' UTR	TAATT	19	1	0.999907	NO	NO	NO
PEX12	NC_000017.11	35574795	35578571	-	NM_000286.3	1416	35575996	CDS	AGACT	8	0.625	0.999909	YES	YES	hsa-miR-219a-1-3p
PLOD1	NC_000001.11	11934717	11975537	+	NM_000302.4	2254	11974815	3' UTR	CCAGG	43	1	0.999913	NO	NO	hsa-miR-221-5p hsa-miR-149-5p
PLOD1	NC_000001.11	11934717	11975537	+	NM_000302.4	2271	11974832	3' UTR	GGACC	47	0.744681	0.999996	YES	YES	NO
PLOD1	NC_000001.11	11934717	11975537	+	NM_000302.4	2314	11974875	3' UTR	GGACC	50	0.1875	0.99995	YES	YES	NO
PLOD1	NC_000001.11	11934717	11975537	+	NM_000302.4	2575	11975136	3' UTR	AGACT	64	0.836066	0.999991	YES	YES	hsa-miR-26a-5p hsa-miR-423-3p hsa-miR-26a-5p hsa-miR-484
PLOD1	NC_000001.11	11934717	11975537	+	NM_000302.4	2615	11975176	3' UTR	AGACT	60	0.813559	0.999984	YES	YES	NO
PLOD1	NC_000001.11	11934717	11975537	+	NM_000302.4	2674	11975235	3' UTR	GGACT	53	0.921569	0.999998	YES	YES	NO
PLOD1	NC_000001.11	11934717	11975537	+	NM_000302.4	2714	11975275	3' UTR	AGACT	47	0.452381	0.99995	YES	YES	NO
PLOD1	NC_000001.11	11934717	11975537	+	NM_000302.4	2740	11975301	3' UTR	GGACT	65	0.984375	1	YES	YES	NO
PON2	NC_000007.14	95404862	95435028	-	NM_000305.3	479	95411745	CDS	CCAGA	20	0.789474	0.999966	NO	NO	hsa-miR-1293 hsa-miR-148b-5p hsa-miR-526b-5p
CTSA	NC_000020.11	45891335	45898820	+	NM_000308.4	1810	45898772	3' UTR	GGACT	58	0.263158	0.999949	YES	YES	hsa-miR-582-5p hsa-miR-101-3p hsa-miR-101-3p hsa-miR-582-5p hsa-miR-363-3p hsa-miR-363-3p
SMN1	NC_000005.10	70925087	70953015	+	NM_000344.4	1108	70952641	3' UTR	GGACT	12	0.636364	0.999972	YES	NO	NO
SNCA	NC_000004.12	89724099	89837161	-	NM_000345.4	395	89822382	CDS	TGAGA	22	0.941176	0.999979	NO	NO	hsa-miR-133a-3p hsa-miR-133b
TGFBI	NC_000005.10	136028988	136063818	+	NM_000358.3	2188	136063294	3' UTR	AGACT	90	0.731707	0.999997	YES	YES	hsa-miR-26a-5p hsa-miR-26b-5p
TGFBI	NC_000005.10	136028988	136063818	+	NM_000358.3	766	136047347	CDS	CGATA	40	0.974359	0.999908	NO	NO	NO
UMPS	NC_000003.12	124730452	124749273	+	NM_000373.4	1451	124744072	CDS	AGACT	19	0.842105	0.999997	YES	YES	hsa-miR-29a-3p hsa-miR-21-3p hsa-miR-29a-3p hsa-miR-29b-3p hsa-miR-29c-3p hsa-miR-21-3p hsa-miR-29a-3p
UMPS	NC_000003.12	124730452	124749273	+	NM_000373.4	595	124737832	CDS	TGAGA	16	1	0.999961	NO	NO	NO
UMPS	NC_000003.12	124730452	124749273	+	NM_000373.4	864	124738101	CDS	AGACT	16	0.875	0.99998	YES	YES	hsa-miR-139-5p
BLMH	NC_000017.11	30248203	30291944	-	NM_000386.4	1583	30248927	3' UTR	GGACT	46	0.692308	0.999974	YES	YES	NO
CDKN1A	NC_000006.12	36678714	36687332	+	NM_000389.5	1951	36687166	3' UTR	GGACT	57	0.339623	0.999955	YES	YES	hsa-miR-515-3p hsa-miR-372-3p hsa-miR-519d-3p hsa-miR-519b-3p hsa-miR-298 hsa-miR-28-5p hsa-miR-132-3p hsa-miR-520a-3p hsa-miR-125a-5p hsa-miR-345-5p hsa-miR-299-5p hsa-miR-93-5p hsa-miR-208b-3p hsa-miR-20b-5p hsa-miR-208a-3p hsa-miR-519e-3p hsa-miR-639 hsa-miR-654-3p hsa-miR-17-5p hsa-miR-106b-5p hsa-miR-106a-5p hsa-miR-20a-5p hsa-miR-572 hsa-miR-520h hsa-miR-363-3p hsa-miR-657 hsa-miR-423-3p hs…
TPP1	NC_000011.10	6612768	6619422	-	NM_000391.4	1791	6614469	3' UTR	GAAGC	17	1	0.999975	NO	NO	hsa-miR-193b-5p hsa-miR-744-5p hsa-miR-27a-3p
COL5A2	NC_000002.12	189031898	189179761	-	NM_000393.5	4744	189033983	3' UTR	TGAGA	18	0.875	0.999988	NO	NO	hsa-miR-335-5p hsa-miR-335-5p hsa-miR-335-5p hsa-miR-29a-3p hsa-miR-29b-3p hsa-miR-29c-3p hsa-miR-767-5p
COL5A2	NC_000002.12	189031898	189179761	-	NM_000393.5	4746	189033981	3' UTR	AGACT	16	0.8	0.999995	YES	YES	hsa-miR-335-5p hsa-miR-335-5p hsa-miR-335-5p hsa-miR-29a-3p hsa-miR-29b-3p hsa-miR-29c-3p hsa-miR-767-5p
CYB5R3	NC_000022.11	42617840	42649392	-	NM_000398.7	1387	42619369	3' UTR	CCAGG	16	0.923077	0.99996	NO	NO	NO
CYB5R3	NC_000022.11	42617840	42649392	-	NM_000398.7	1468	42619288	3' UTR	AGACA	33	0.46875	0.999934	YES	YES	NO
CYB5R3	NC_000022.11	42617840	42649392	-	NM_000398.7	1916	42618840	3' UTR	AAAAA	22	0.952381	0.999987	NO	NO	NO
CYB5R3	NC_000022.11	42617840	42649392	-	NM_000398.7	1917	42618839	3' UTR	AAAAA	24	0.954545	0.999986	NO	NO	NO
CYB5R3	NC_000022.11	42617840	42649392	-	NM_000398.7	1918	42618838	3' UTR	AAAAA	26	0.958333	0.999991	NO	NO	NO
CYB5R3	NC_000022.11	42617840	42649392	-	NM_000398.7	1919	42618837	3' UTR	AAAAA	30	0.962963	0.999923	NO	NO	NO
CYB5R3	NC_000022.11	42617840	42649392	-	NM_000398.7	565	42627664	CDS	CAAAA	17	0.875	0.999956	NO	NO	hsa-miR-378d hsa-miR-129-5p hsa-miR-378d hsa-miR-378d hsa-miR-378c hsa-miR-378c
GLB1	NC_000003.12	32996617	33097146	-	NM_000404.4	2039	32997101	CDS	AAAGA	38	0.972222	0.999981	NO	NO	NO
GLB1	NC_000003.12	32996617	33097146	-	NM_000404.4	2041	32997099	CDS	AGACT	39	0.897436	0.999998	YES	YES	NO
KRT17	NC_000017.11	41619442	41624575	-	NM_000422.3	317	41624259	CDS	TGAGA	42	0.542857	0.999984	NO	NO	NO
TWIST1	NC_000007.14	19115468	19117636	-	NM_000474.4	1007	19116091	3' UTR	AGAGA	15	0.769231	0.999951	NO	NO	NO
TWIST1	NC_000007.14	19115468	19117636	-	NM_000474.4	1009	19116089	3' UTR	AGACT	15	0.666667	0.999983	YES	YES	NO
TWIST1	NC_000007.14	19115468	19117636	-	NM_000474.4	1329	19115769	3' UTR	GGACT	14	0.916667	0.999974	YES	YES	hsa-miR-300 hsa-miR-543 hsa-miR-539-5p
APP	NC_000021.9	25880550	26170770	-	NM_000484.4	3218	25880915	3' UTR	CAATT	21	1	0.999985	NO	NO	hsa-miR-182-5p hsa-miR-182-5p hsa-miR-182-5p hsa-miR-182-5p hsa-miR-182-5p hsa-miR-182-5p
GNAS	NC_000020.11	58891421	58911192	+	NM_000516.7	1204	58910009	CDS	AGAAA	122	0.765306	0.99996	NO	NO	hsa-miR-365a-5p hsa-miR-3158-3p hsa-miR-3158-3p hsa-miR-365a-5p hsa-miR-3158-3p hsa-miR-365a-5p hsa-miR-3158-3p hsa-miR-365a-5p
TAP1	NC_000006.12	32845209	32853704	-	NM_000593.6	2309	32845585	CDS	CCAGA	15	0.785714	0.999923	NO	NO	NO
CD59	NC_000011.10	33703010	33736423	-	NM_000611.6	373	33710200	CDS	GGACA	172	0.421053	0.999963	YES	YES	NO
IL10RB	NC_000021.9	33266367	33297221	+	NM_000628.5	1781	33297061	3' UTR	GGACT	16	0.8	0.999977	YES	YES	NO
TGFB1	NC_000019.10	41330323	41353922	-	NM_000660.7	299	41353624	5'UTR	AGACT	15	0.666667	0.999979	YES	YES	NO
TGFB1	NC_000019.10	41330323	41353922	-	NM_000660.7	503	41353420	5'UTR	AGACT	18	0.764706	0.999934	YES	YES	NO
TGFB1	NC_000019.10	41330323	41353922	-	NM_000660.7	965	41352958	CDS	GGACT	26	0.5	0.999969	YES	YES	NO
ACY1	NC_000003.12	51983535	51989197	+	NM_000666.3	271	51985399	CDS	CCAGG	23	0.956522	0.999944	NO	NO	NO
ADH5	NC_000004.12	99070978	99088788	-	NM_000671.4	1404	99072226	3' UTR	GGATG	25	0.954545	0.99996	NO	NO	hsa-miR-423-5p hsa-miR-28-5p hsa-miR-103a-3p
AHCY	NC_000020.11	34280268	34303355	-	NM_000687.4	1741	34280677	3' UTR	GGACT	37	0.571429	0.99998	YES	NO	hsa-miR-27a-3p hsa-miR-27b-3p hsa-miR-331-5p
ALDH3A1	NC_000017.11	19737989	19748298	-	NM_000691.5	1121	19739548	CDS	TGAGA	12	0.909091	0.999906	NO	NO	NO
ALDH3A1	NC_000017.11	19737989	19748298	-	NM_000691.5	1124	19739545	CDS	GAAGC	12	1	0.999996	NO	NO	NO
ALDH3B1	NC_000011.10	68010327	68029276	+	NM_000694.4	1146	68022724	CDS	GAAGC	16	1	0.999967	NO	NO	NO
ALDH3B1	NC_000011.10	68010327	68029276	+	NM_000694.4	2241	68028706	3' UTR	GGACT	19	0.842105	0.999945	YES	YES	NO
ALDH3B1	NC_000011.10	68010327	68029276	+	NM_000694.4	2703	68029168	3' UTR	AGACT	26	0.391304	0.999925	YES	YES	NO
BLVRB	NC_000019.10	40447768	40465745	-	NM_000713.3	774	40447793	3' UTR	AGAGA	36	0.846154	0.999955	NO	NO	hsa-miR-518f-5p hsa-miR-519a-5p
CHRNB1	NC_000017.11	7445061	7457710	+	NM_000747.3	1703	7456853	3' UTR	GGACT	9	1	0.999952	YES	NO	NO
FKBP1A	NC_000020.11	1368978	1393054	-	NM_000801.5	627	1369865	3' UTR	TTATT	82	0.742857	0.999916	NO	NO	NO
P4HB	NC_000017.11	81843166	81860535	-	NM_000918.4	2049	81843554	3' UTR	GGACT	300	0.905263	1	YES	YES	NO
P4HB	NC_000017.11	81843166	81860535	-	NM_000918.4	2054	81843549	3' UTR	GGACA	308	0.504983	0.999975	YES	YES	NO
P4HB	NC_000017.11	81843166	81860535	-	NM_000918.4	564	81855266	CDS	GGACT	103	0.242718	0.999912	YES	YES	NO
PDHB	NC_000003.12	58427630	58433832	-	NM_000925.4	1109	58428028	3' UTR	GGACT	21	0.619048	0.999976	YES	YES	hsa-miR-26b-5p
PDHB	NC_000003.12	58427630	58433832	-	NM_000925.4	175	58431929	CDS	TGAGA	27	0.826087	0.999966	NO	NO	hsa-miR-532-5p hsa-miR-335-3p hsa-miR-141-5p hsa-miR-942-5p hsa-miR-335-3p
PPIB	NC_000015.10	64155817	64163022	-	NM_000942.5	823	64155887	3' UTR	GGACT	393	0.762533	0.999998	YES	YES	hsa-miR-93-5p hsa-miR-106a-5p hsa-miR-106b-5p hsa-miR-17-5p hsa-miR-106b-5p hsa-miR-330-5p hsa-miR-106a-5p hsa-miR-17-5p hsa-miR-93-5p hsa-miR-106a-5p hsa-miR-93-5p hsa-miR-106a-5p hsa-miR-106b-5p hsa-miR-17-5p hsa-miR-627-5p hsa-miR-20b-5p hsa-miR-106a-5p hsa-miR-106b-5p hsa-miR-17-5p hsa-miR-20a-5p hsa-miR-17-5p hsa-miR-106a-5p hsa-miR-106b-5p hsa-miR-106a-5p hsa-miR-106b-5p hsa-miR-17-5p hsa-m…
RPL13	NC_000016.10	89560682	89564542	+	NM_000977.4	947	89563302	3' UTR	GGACT	299	0.517361	0.999928	YES	YES	NO
RPL27A	NC_000011.10	8682792	8689872	+	NM_000990.5	260	8684812	CDS	GGACT	6261	0.065278	0.99999	YES	NO	hsa-miR-193a-3p hsa-miR-193b-3p hsa-miR-193b-3p
RPL38	NC_000017.11	74203678	74210655	+	NM_000999.4	270	74209286	CDS	GAAAC	2372	0.0954215	0.999998	NO	NO	NO
CD44	NC_000011.10	35139171	35232402	+	NM_001001391.2	1283	35229397	3' UTR	GGACA	59	0.77193	0.999979	YES	YES	hsa-miR-302c-3p hsa-miR-34a-5p hsa-miR-148a-5p hsa-miR-520c-3p hsa-miR-330-3p hsa-miR-608 hsa-miR-216a-5p
CD44	NC_000011.10	35139171	35232402	+	NM_001001391.2	754	35190019	CDS	GAAGA	36	0.882353	0.999996	NO	NO	hsa-miR-185-3p hsa-miR-185-3p
CD44	NC_000011.10	35139171	35232402	+	NM_001001391.2	756	35190021	CDS	AGACA	34	0.933333	0.999975	YES	YES	hsa-miR-185-3p hsa-miR-185-3p
TSR3	NC_000016.10	1349240	1351878	-	NM_001001410.3	1009	1349441	CDS	AGACT	43	0.7	0.999996	YES	YES	hsa-miR-942-5p hsa-miR-30a-3p
TSR3	NC_000016.10	1349240	1351878	-	NM_001001410.3	1064	1349386	3' UTR	AGACA	49	0.5625	0.999977	YES	YES	NO
TSR3	NC_000016.10	1349240	1351878	-	NM_001001410.3	963	1349487	CDS	CCAGG	42	0.973684	0.999944	NO	NO	NO
TIMM50	NC_000019.10	39480838	39493779	+	NM_001001563.5	1234	39489976	3' UTR	GGACT	12	0.833333	0.999977	YES	YES	NO
MED11	NC_000017.11	4731428	4733607	+	NM_001001683.4	430	4733201	3' UTR	GGACC	43	0.166667	0.999916	YES	YES	NO
C8orf82	NC_000008.11	144525733	144529111	-	NM_001001795.2	903	144527285	3' UTR	GGACT	22	0.52381	0.999994	YES	YES	NO
PIM3	NC_000022.11	49960772	49964072	+	NM_001001852.4	1325	49963295	3' UTR	GGACT	39	0.820513	0.999988	YES	YES	NO
PIM3	NC_000022.11	49960772	49964072	+	NM_001001852.4	1357	49963327	3' UTR	AGACG	30	0.482759	0.999963	NO	YES	hsa-miR-34a-5p hsa-miR-1307-5p hsa-miR-34a-5p hsa-miR-34a-5p hsa-miR-34a-5p hsa-miR-34a-5p hsa-miR-9-5p hsa-miR-34a-5p hsa-miR-1307-5p hsa-miR-34a-5p
NT5C3A	NC_000007.14	33014130	33062776	-	NM_001002010.5	1140	33014657	3' UTR	AGACT	12	1	0.999977	YES	YES	NO
NT5C3A	NC_000007.14	33014130	33062776	-	NM_001002010.5	994	33014803	CDS	GGACT	12	0.545455	0.999938	YES	YES	NO
HCFC1R1	NC_000016.10	3022620	3024286	-	NM_001002017.2	299	3023988	5'UTR	AGACT	19	0.470588	0.99997	YES	YES	NO
ANAPC11	NC_000017.11	81891723	81900255	+	NM_001002248.3	144	81893576	5'UTR	CCAGG	27	0.962963	0.999913	NO	NO	NO
ANAPC11	NC_000017.11	81891927	81900533	+	NM_001002249.2	205	81893576	5'UTR	CCAGG	29	1	0.999991	NO	NO	NO
ARL6IP4	NC_000012.12	122980681	122982909	+	NM_001002251.3	218	122981281	CDS	GCACG	18	1	0.999973	NO	NO	NO
DERPC	NC_000016.10	69118010	69132588	-	NM_001002847.4	2276	69118537	3' UTR	GGACT	11	0.818182	0.99999	YES	YES	hsa-miR-423-5p hsa-miR-106a-5p hsa-miR-106a-5p hsa-miR-139-5p hsa-miR-139-5p hsa-miR-423-5p hsa-miR-423-5p hsa-miR-423-5p hsa-miR-423-5p
SMAD2	NC_000018.10	47808957	47930872	-	NM_001003652.4	1559	47841798	3' UTR	AGACT	10	0.7	0.999958	YES	YES	NO
SMAD2	NC_000018.10	47808957	47930872	-	NM_001003652.4	1608	47841749	3' UTR	GGACT	10	1	0.999994	YES	YES	hsa-miR-132-3p hsa-miR-181a-5p hsa-miR-212-3p hsa-miR-30a-5p hsa-miR-30b-5p hsa-miR-30c-5p hsa-miR-30d-5p
UQCR10	NC_000022.11	29767369	29770413	+	NM_001003684.2	432	29769870	3' UTR	ACAGA	77	0.972603	0.999968	NO	NO	NO
MTFP1	NC_000022.11	30425768	30429054	+	NM_001003704.3	684	30428838	3' UTR	AGACT	10	1	0.999922	YES	YES	NO
NOMO3	NC_000016.10	16232528	16294811	+	NM_001004067.4	4015	16294506	3' UTR	GGACC	17	0.941176	0.999954	YES	NO	hsa-miR-181b-5p hsa-miR-181d-5p
RNASEK	NC_000017.11	7012624	7014532	+	NM_001004333.5	480	7014409	3' UTR	AGACT	341	0.611486	0.999938	YES	YES	NO
NRARP	NC_000009.12	137299631	137302271	-	NM_001004354.3	1085	137301187	3' UTR	GGACT	15	0.928571	0.999983	YES	YES	NO
METRNL	NC_000017.11	83079609	83095122	+	NM_001004431.3	1076	83094508	CDS	GGACT	14	0.928571	0.999986	YES	YES	NO
METRNL	NC_000017.11	83079609	83095122	+	NM_001004431.3	1287	83094719	3' UTR	GGACG	25	0.772727	0.999997	NO	NO	hsa-miR-139-5p hsa-miR-139-5p hsa-miR-139-5p hsa-miR-34a-5p hsa-miR-139-5p
METRNL	NC_000017.11	83079609	83095122	+	NM_001004431.3	545	83085105	CDS	GGACT	20	0.65	0.999991	YES	YES	hsa-let-7c-5p hsa-miR-125a-5p hsa-miR-125b-5p hsa-miR-151a-5p hsa-miR-151a-5p
METRNL	NC_000017.11	83079609	83095122	+	NM_001004431.3	591	83085151	CDS	AGACT	25	0.652174	0.99999	YES	YES	NO
RGS10	NC_000010.11	119499817	119542719	-	NM_001005339.2	479	119515510	CDS	CCAGA	24	0.944444	0.999943	NO	NO	NO
RGS10	NC_000010.11	119499817	119542719	-	NM_001005339.2	645	119500095	3' UTR	GGACT	34	0.65625	0.999991	YES	YES	hsa-miR-320c hsa-miR-320c hsa-miR-320b hsa-miR-320b hsa-miR-320a-3p hsa-miR-223-3p
TCEAL1	NC_000023.11	103628975	103630953	+	NM_001006639.2	498	103630263	CDS	GGACA	30	0.407407	0.999993	YES	YES	hsa-miR-297 hsa-miR-365a-3p hsa-miR-365b-3p hsa-miR-204-5p
TCEAL1	NC_000023.11	103628975	103630953	+	NM_001006639.2	688	103630453	3' UTR	GGACT	35	0.828571	0.999993	YES	YES	hsa-miR-191-5p hsa-miR-191-5p
TCEAL1	NC_000023.11	103628716	103630953	+	NM_001006640.2	525	103630263	CDS	GGACA	18	0.529412	0.999969	YES	YES	hsa-miR-297 hsa-miR-365a-3p hsa-miR-365b-3p hsa-miR-204-5p
TCEAL1	NC_000023.11	103628716	103630953	+	NM_001006640.2	715	103630453	3' UTR	GGACT	26	0.846154	0.999969	YES	YES	hsa-miR-191-5p hsa-miR-191-5p
TCEAL8	NC_000023.11	103252995	103255155	-	NM_001006684.2	328	103253768	CDS	GGACC	18	0.470588	0.999986	YES	YES	NO
TCEAL8	NC_000023.11	103252995	103255155	-	NM_001006684.2	428	103253668	CDS	AGACA	18	0.777778	0.999974	YES	YES	NO
ALG3	NC_000003.12	184242329	184249525	-	NM_001006941.2	1478	184242457	3' UTR	GGACT	11	0.6	0.999967	YES	YES	NO
SPOP	NC_000017.11	49598884	49678097	-	NM_001007228.2	1476	49600258	3' UTR	AGACT	8	1	0.999936	YES	YES	NO
F8A2	NC_000023.11	155382095	155383801	+	NM_001007523.2	1179	155383273	3' UTR	GGACT	8	0.875	0.999928	YES	NO	hsa-miR-19b-3p hsa-miR-92a-3p hsa-miR-92b-3p hsa-miR-92a-3p hsa-miR-21-5p hsa-miR-92a-3p hsa-miR-92a-3p
TTC32	NC_000002.12	19896631	19901983	-	NM_001008237.3	386	19897928	CDS	AGAAG	26	1	0.999922	NO	NO	NO
TTC32	NC_000002.12	19896631	19901983	-	NM_001008237.3	530	19897042	CDS	ACAGA	38	1	0.999959	NO	NO	NO
TTC32	NC_000002.12	19896631	19901983	-	NM_001008237.3	532	19897040	CDS	AGACT	37	0.794118	0.999932	YES	NO	NO
THAP7	NC_000022.11	20999772	21002115	-	NM_001008695.1	841	20999999	CDS	TGAGA	26	0.913043	0.999979	NO	NO	NO
THAP7	NC_000022.11	20999772	21002115	-	NM_001008695.1	843	20999997	CDS	AGACT	23	0.952381	0.999994	YES	YES	NO
PPP1CA	NC_000011.10	67398183	67401858	-	NM_001008709.2	990	67398723	CDS	CCAGA	11	0.8	0.999954	NO	NO	NO
C6orf226	NC_000006.12	42890265	42890821	-	NM_001008739.2	446	42890376	3' UTR	AGACT	17	0.75	0.999996	YES	YES	hsa-miR-15b-5p
C6orf226	NC_000006.12	42890265	42890821	-	NM_001008739.2	492	42890330	3' UTR	GGACC	17	0.5	0.999962	YES	YES	NO
CCT3	NC_000001.11	156308968	156338292	-	NM_001008800.3	1788	156309043	3' UTR	AGACA	70	0.181818	0.999912	YES	YES	hsa-miR-148a-3p hsa-miR-148b-3p hsa-miR-34a-5p hsa-miR-148b-3p hsa-miR-148b-3p hsa-miR-148a-3p hsa-miR-9-5p hsa-miR-34a-5p hsa-miR-33b-3p
CCT3	NC_000001.11	156308968	156338292	-	NM_001008800.3	744	156318877	CDS	GGAGA	31	1	0.999973	NO	NO	NO
CCT3	NC_000001.11	156308968	156338292	-	NM_001008800.3	746	156318875	CDS	AGAAA	30	0.965517	0.999973	NO	NO	NO
CCT3	NC_000001.11	156308968	156338292	-	NM_001008800.3	747	156318874	CDS	GAAAG	29	0.925926	0.999963	NO	NO	NO
CKAP5	NC_000011.10	46743048	46846280	-	NM_001008938.4	3319	46770064	CDS	AGAGA	7	1	0.999974	NO	NO	hsa-miR-1287-3p hsa-miR-9-5p
CCT6A	NC_000007.14	56051765	56063989	+	NM_001009186.2	2032	56063572	3' UTR	GGACT	25	0.44	0.99996	YES	YES	NO
KIAA0930	NC_000022.11	45192244	45240894	-	NM_001009880.2	2145	45196437	3' UTR	GGATT	10	0.8	0.999974	NO	NO	NO
TMEM230	NC_000020.11	5099850	5113076	-	NM_001009925.2	1079	5100206	3' UTR	TTAAC	17	1	0.999911	NO	NO	hsa-miR-30a-5p hsa-miR-30e-5p
SSBP4	NC_000019.10	18419398	18434562	+	NM_001009998.4	1486	18434389	3' UTR	AGACT	12	0.833333	0.999984	YES	YES	hsa-let-7c-5p hsa-let-7a-5p hsa-let-7b-5p
RNF187	NC_000001.11	228487382	228496188	+	NM_001010858.3	1156	228494226	3' UTR	GGACC	45	0.111111	0.999938	YES	YES	hsa-miR-125a-5p
RAP1B	NC_000012.12	68610899	68671901	+	NM_001010942.3	1123	68659646	3' UTR	AAAGA	17	1	0.99993	NO	NO	hsa-miR-139-5p hsa-miR-139-5p
RAP1B	NC_000012.12	68610899	68671901	+	NM_001010942.3	1125	68659648	3' UTR	AGAAA	16	0.8	0.999979	NO	NO	hsa-miR-139-5p hsa-miR-139-5p
RAP1B	NC_000012.12	68610899	68671901	+	NM_001010942.3	1126	68659649	3' UTR	GAAAG	15	0.769231	0.999967	NO	NO	hsa-miR-139-5p hsa-miR-139-5p
RAP1B	NC_000012.12	68610899	68671901	+	NM_001010942.3	830	68659353	3' UTR	GGACT	32	0.4375	0.999988	YES	NO	hsa-miR-139-5p hsa-miR-139-5p
RAP1B	NC_000012.12	68610899	68671901	+	NM_001010942.3	994	68659517	3' UTR	AGACA	42	0.425	0.999985	YES	NO	hsa-miR-139-5p hsa-miR-139-5p
HERPUD1	NC_000016.10	56932142	56944864	+	NM_001010989.3	1319	56943333	3' UTR	GGACT	11	0.888889	0.999945	YES	YES	NO
C1GALT1C1	NC_000023.11	120625674	120630054	-	NM_001011551.3	414	120626896	CDS	GGACC	23	0.391304	0.999993	YES	YES	hsa-miR-133b hsa-miR-133b
C1GALT1C1	NC_000023.11	120625674	120630054	-	NM_001011551.3	484	120626826	CDS	GGACA	17	1	0.999979	YES	YES	NO
C1GALT1C1	NC_000023.11	120625674	120630054	-	NM_001011551.3	547	120626763	CDS	AGACC	24	0.409091	0.999983	YES	YES	NO
C1GALT1C1	NC_000023.11	120625674	120630054	-	NM_001011551.3	729	120626581	CDS	AAAGA	26	0.96	0.999969	NO	NO	NO
C1GALT1C1	NC_000023.11	120625674	120630054	-	NM_001011551.3	731	120626579	CDS	AGACT	26	1	0.999955	YES	YES	NO
C1GALT1C1	NC_000023.11	120625674	120630054	-	NM_001011551.3	921	120626389	CDS	TGACT	20	0.947368	0.999991	YES	YES	NO
C1GALT1C1	NC_000023.11	120625674	120630054	-	NM_001011551.3	983	120626327	CDS	GGACT	29	1	0.999975	YES	YES	NO
CTNNBIP1	NC_000001.11	9848276	9910269	-	NM_001012329.2	741	9850507	3' UTR	GGACT	10	0.5	0.999904	YES	YES	NO
DNAJC21	NC_000005.10	34929559	34958964	+	NM_001012339.3	1908	34954765	3' UTR	AAAAC	33	0.708333	0.999957	NO	NO	NO
SLC3A2	NC_000011.10	62856109	62888860	+	NM_001012662.3	2074	62888710	3' UTR	GGACC	13	0.615385	0.999991	YES	YES	hsa-miR-196b-5p hsa-let-7d-5p hsa-miR-196a-5p hsa-miR-23b-5p hsa-let-7d-5p hsa-let-7d-5p hsa-let-7d-5p hsa-miR-196b-5p hsa-miR-196a-5p hsa-miR-196a-5p hsa-let-7d-5p hsa-let-7d-5p hsa-miR-196b-5p hsa-miR-196a-5p hsa-miR-196a-5p hsa-miR-197-5p hsa-miR-203b-5p hsa-miR-196b-5p
SLC3A2	NC_000011.10	62856109	62888860	+	NM_001012664.3	1622	62888447	CDS	GGACT	32	0.40625	0.999955	YES	YES	hsa-let-7d-5p hsa-let-7d-5p hsa-let-7d-5p hsa-let-7d-5p
SLC3A2	NC_000011.10	62856109	62888860	+	NM_001012664.3	1885	62888710	3' UTR	GGACC	22	0.285714	0.999966	YES	YES	hsa-miR-196b-5p hsa-let-7d-5p hsa-miR-196a-5p hsa-miR-23b-5p hsa-let-7d-5p hsa-let-7d-5p hsa-let-7d-5p hsa-miR-196b-5p hsa-miR-196a-5p hsa-miR-196a-5p hsa-let-7d-5p hsa-let-7d-5p hsa-miR-196b-5p hsa-miR-196a-5p hsa-miR-196a-5p hsa-miR-197-5p hsa-miR-203b-5p hsa-miR-196b-5p
SLC3A2	NC_000011.10	62880896	62888860	+	NM_001013251.3	1735	62888710	3' UTR	GGACC	47	0.395349	0.999932	YES	YES	hsa-miR-196b-5p hsa-let-7d-5p hsa-miR-196a-5p hsa-miR-23b-5p hsa-let-7d-5p hsa-let-7d-5p hsa-let-7d-5p hsa-miR-196b-5p hsa-miR-196a-5p hsa-miR-196a-5p hsa-let-7d-5p hsa-let-7d-5p hsa-miR-196b-5p hsa-miR-196a-5p hsa-miR-196a-5p hsa-miR-197-5p hsa-miR-203b-5p hsa-miR-196b-5p
MPST	NC_000022.11	37019742	37029815	+	NM_001013436.4	602	37024760	CDS	GGACT	27	0.346154	0.999982	YES	YES	NO
MPST	NC_000022.11	37019742	37029815	+	NM_001013436.4	773	37029336	CDS	GGACC	26	0.269231	0.999973	YES	YES	NO
FXR1	NC_000003.12	180912670	180982753	+	NM_001013438.3	2030	180976532	3' UTR	AAAAA	23	0.9	0.999971	NO	NO	NO
SRRD	NC_000022.11	26483877	26494658	+	NM_001013694.3	1186	26491824	3' UTR	GGACT	11	0.909091	0.999975	YES	YES	NO
EMC6	NC_000017.11	3668812	3669665	+	NM_001014764.3	600	3669496	3' UTR	GGACT	36	0.828571	0.999984	YES	YES	hsa-miR-3184-3p
EMC6	NC_000017.11	3668812	3669665	+	NM_001014764.3	627	3669523	3' UTR	GGACT	33	0.892857	0.999943	YES	YES	hsa-miR-101-3p hsa-miR-27b-3p hsa-miR-27a-3p hsa-miR-101-3p hsa-miR-24-3p hsa-miR-27b-3p hsa-miR-101-3p hsa-miR-27b-3p hsa-miR-128-3p hsa-miR-1910-5p hsa-miR-27b-3p hsa-miR-27a-3p hsa-miR-27a-3p
RTKN	NC_000002.12	74425861	74440583	-	NM_001015056.1	1933	74426122	3' UTR	GGACC	9	0.888889	0.999986	YES	YES	NO
CYB561	NC_000017.11	63432304	63446639	-	NM_001017916.2	2163	63433750	3' UTR	GAAGC	10	1	0.999927	NO	NO	NO
OS9	NC_000012.12	57694132	57721557	+	NM_001017956.3	1916	57720956	3' UTR	GGACT	11	0.818182	0.999988	YES	NO	hsa-miR-361-3p
OS9	NC_000012.12	57694132	57721557	+	NM_001017956.3	1991	57721031	3' UTR	GGACC	13	0.333333	0.999905	YES	NO	NO
HSP90AA1	NC_000014.9	102080742	102139749	-	NM_001017963.3	1148	102085850	CDS	TGAGA	16	1	0.999983	NO	NO	hsa-miR-139-5p hsa-miR-335-3p
HSP90AA1	NC_000014.9	102080742	102139749	-	NM_001017963.3	1150	102085848	CDS	AGAAA	15	1	0.999995	NO	NO	hsa-miR-139-5p hsa-miR-101-3p hsa-miR-335-3p
HSP90AA1	NC_000014.9	102080742	102139749	-	NM_001017963.3	1151	102085847	CDS	GAAAG	13	1	0.99998	NO	NO	hsa-miR-23b-3p hsa-miR-23b-3p hsa-miR-101-3p hsa-miR-23b-3p hsa-miR-23b-3p hsa-miR-335-3p hsa-miR-23a-3p
HSP90AA1	NC_000014.9	102080742	102139749	-	NM_001017963.3	1152	102085846	CDS	AAAGT	12	1	0.999915	NO	NO	hsa-miR-23b-3p hsa-miR-23b-3p hsa-miR-101-3p hsa-miR-10399-5p hsa-miR-23b-3p hsa-miR-23b-3p hsa-miR-335-3p hsa-miR-23a-3p
BRCC3	NC_000023.11	155071508	155123077	+	NM_001018055.3	1363	155121671	3' UTR	GGACT	8	1	0.999974	YES	YES	NO
SERBP1	NC_000001.11	67407810	67430402	-	NM_001018067.2	1429	67413107	3' UTR	AAAGA	24	1	0.999933	NO	NO	hsa-miR-34a-5p hsa-miR-542-3p hsa-miR-542-3p hsa-miR-449a hsa-miR-425-5p hsa-miR-34a-5p hsa-miR-34a-5p hsa-miR-34a-5p
SERBP1	NC_000001.11	67407810	67430402	-	NM_001018067.2	1431	67413105	3' UTR	AGACT	21	1	0.999995	YES	YES	hsa-miR-34a-5p hsa-miR-542-3p hsa-miR-542-3p hsa-miR-449a hsa-miR-425-5p hsa-miR-34a-5p hsa-miR-34a-5p hsa-miR-34a-5p
SERBP1	NC_000001.11	67407810	67430402	-	NM_001018068.2	1413	67413105	3' UTR	AGACT	39	0.945946	0.999931	YES	YES	hsa-miR-34a-5p hsa-miR-542-3p hsa-miR-542-3p hsa-miR-449a hsa-miR-425-5p hsa-miR-34a-5p hsa-miR-34a-5p hsa-miR-34a-5p
SERBP1	NC_000001.11	67407810	67430402	-	NM_001018068.2	1442	67413076	3' UTR	AGACT	40	0.948718	0.99999	YES	YES	NO
SERBP1	NC_000001.11	67407810	67430402	-	NM_001018069.2	1378	67413113	3' UTR	AAAAA	48	0.651163	0.999915	NO	NO	NO
SERBP1	NC_000001.11	67407810	67430402	-	NM_001018069.2	1384	67413107	3' UTR	AAAGA	41	0.95122	0.999939	NO	NO	hsa-miR-34a-5p hsa-miR-542-3p hsa-miR-542-3p hsa-miR-449a hsa-miR-425-5p hsa-miR-34a-5p hsa-miR-34a-5p hsa-miR-34a-5p
SERBP1	NC_000001.11	67407810	67430402	-	NM_001018069.2	1386	67413105	3' UTR	AGACT	38	1	0.999997	YES	YES	hsa-miR-34a-5p hsa-miR-542-3p hsa-miR-542-3p hsa-miR-449a hsa-miR-425-5p hsa-miR-34a-5p hsa-miR-34a-5p hsa-miR-34a-5p
SERBP1	NC_000001.11	67407810	67430402	-	NM_001018069.2	1415	67413076	3' UTR	AGACT	49	0.822222	0.999988	YES	YES	NO
ABCF1	NC_000006.12	30571442	30591522	+	NM_001025091.2	2632	30590749	3' UTR	AGAAG	14	1	0.999931	NO	NO	hsa-miR-1285-3p
ABCF1	NC_000006.12	30571442	30591522	+	NM_001025091.2	2770	30590887	3' UTR	AGACT	16	0.9375	0.999981	YES	YES	NO
ABCF1	NC_000006.12	30571442	30591522	+	NM_001025091.2	3005	30591122	3' UTR	TGACT	20	0.944444	0.999984	YES	YES	hsa-miR-34a-5p
ADGRE5	NC_000019.10	14381444	14408723	+	NM_001025160.3	2781	14408461	3' UTR	GGACT	17	0.764706	0.999983	YES	YES	NO
DUT	NC_000015.10	48331429	48343373	+	NM_001025248.2	1167	48342399	3' UTR	AAAAA	82	0.909091	0.999996	NO	NO	NO
DUT	NC_000015.10	48331429	48343373	+	NM_001025248.2	1168	48342400	3' UTR	AAAAA	83	0.90411	0.999984	NO	NO	NO
DUT	NC_000015.10	48331429	48343373	+	NM_001025248.2	1169	48342401	3' UTR	AAAAA	79	0.907895	0.999954	NO	NO	NO
DUT	NC_000015.10	48331424	48343373	+	NM_001025249.1	857	48342400	3' UTR	AAAAA	57	0.860465	0.999926	NO	NO	NO
DUT	NC_000015.10	48331424	48343373	+	NM_001025249.1	858	48342401	3' UTR	AAAAA	54	0.833333	0.999954	NO	NO	NO
SPAG16	NC_000002.12	213284464	213317985	+	NM_001025436.3	599	213317399	3' UTR	GGACT	15	0.466667	0.999935	YES	YES	NO
SPAG16	NC_000002.12	213284464	213317985	+	NM_001025436.3	987	213317787	3' UTR	GGACT	16	0.5	0.999969	YES	YES	NO
CPTP	NC_000001.11	1324802	1328896	+	NM_001029885.2	1819	1328561	3' UTR	GGACT	10	1	0.999985	YES	YES	NO
WDR45	NC_000023.11	49074442	49079887	-	NM_001029896.2	1240	49074800	3' UTR	GGACC	56	0.647059	0.999977	YES	YES	NO
RPS15A	NC_000016.10	18781295	18790334	-	NM_001030009.2	463	18782969	3' UTR	GGACT	244	0.407563	0.999901	YES	YES	hsa-miR-29a-3p hsa-miR-29b-3p hsa-miR-29c-3p hsa-miR-29a-3p hsa-miR-29b-3p hsa-miR-29c-3p hsa-miR-15a-3p hsa-miR-624-5p hsa-miR-29a-3p hsa-miR-29b-3p hsa-miR-29c-3p hsa-miR-29a-3p hsa-miR-29c-3p hsa-miR-29b-3p hsa-miR-29a-3p hsa-miR-29b-3p hsa-miR-29c-3p hsa-miR-29a-3p hsa-miR-29b-3p hsa-miR-29c-3p hsa-miR-29c-3p hsa-miR-29a-3p hsa-miR-29a-3p hsa-miR-28-3p hsa-miR-29c-3p hsa-miR-28-3p hsa-miR-767…
RPS29	NC_000014.9	49570988	49586380	-	NM_001030001.4	329	49577721	3' UTR	AGACT	23	0.954545	0.999992	YES	YES	NO
ALDH3B1	NC_000011.10	68010327	68029276	+	NM_001030010.3	1035	68022724	CDS	GAAGC	13	1	0.999993	NO	NO	NO
ALDH3B1	NC_000011.10	68010327	68029276	+	NM_001030010.3	2130	68028706	3' UTR	GGACT	15	1	0.999992	YES	YES	NO
ALDH3B1	NC_000011.10	68010327	68029276	+	NM_001030010.3	2525	68029101	3' UTR	GGACA	14	0.692308	0.999958	YES	YES	NO
ALDH3B1	NC_000011.10	68010327	68029276	+	NM_001030010.3	2637	68029213	3' UTR	GGACC	20	0.277778	0.999916	YES	YES	NO
ERGIC1	NC_000005.10	172834251	172952683	+	NM_001031711.3	1063	172950843	3' UTR	GGACC	17	0.3125	0.999938	YES	YES	NO
ERGIC1	NC_000005.10	172834251	172952683	+	NM_001031711.3	2096	172951876	3' UTR	GGACT	24	0.434783	0.999992	YES	YES	NO
MMP28	NC_000017.11	35778505	35795641	-	NM_001032278.3	724	35778807	3' UTR	GGACT	16	0.785714	0.999968	YES	NO	NO
MMP28	NC_000017.11	35778505	35795641	-	NM_001032278.3	729	35778802	3' UTR	GGACT	18	1	0.999963	YES	NO	NO
TFAP2A	NC_000006.12	10396677	10412391	-	NM_001032280.3	2258	10398250	3' UTR	GGACT	10	0.714286	0.999948	YES	YES	NO
UBE2V1	NC_000020.11	50081124	50113150	-	NM_001032288.3	790	50082444	3' UTR	AGACA	25	0.291667	0.999988	YES	YES	NO
ZNF207	NC_000017.11	32350157	32381885	+	NM_001032293.3	1660	32369898	3' UTR	GGACA	31	0.866667	0.999975	YES	YES	hsa-miR-145-5p
ZNF207	NC_000017.11	32350157	32381885	+	NM_001032293.3	197	32351812	CDS	TGAGA	16	1	0.99993	NO	NO	NO
ZNF207	NC_000017.11	32350157	32381885	+	NM_001032293.3	435	32358640	CDS	CAAGA	16	1	0.999975	NO	NO	NO
ZNF207	NC_000017.11	32350157	32381885	+	NM_001032293.3	437	32360598	CDS	AGAAA	18	1	0.999977	NO	NO	NO
ZNF207	NC_000017.11	32350157	32381885	+	NM_001032293.3	438	32360599	CDS	GAAAG	16	1	0.99998	NO	NO	NO
MICOS10	NC_000001.11	19596979	19629820	+	NM_001032363.4	528	19626625	3' UTR	AGAGG	75	0.815385	0.999963	NO	NO	NO
NGRN	NC_000015.10	90265672	90272211	+	NM_001033088.3	1043	90271914	3' UTR	GGACT	20	1	0.999995	YES	YES	hsa-miR-101-3p hsa-miR-139-5p hsa-miR-139-5p hsa-miR-139-5p
CSTF3	NC_000011.10	33141431	33161480	-	NM_001033505.2	602	33141445	3' UTR	AAACA	21	0.944444	0.999981	YES	YES	NO
BABAM1	NC_000019.10	17267443	17279337	+	NM_001033549.3	1207	17279129	3' UTR	GGACC	31	0.483871	0.999961	YES	YES	NO
ERP29	NC_000012.12	112013426	112023449	+	NM_001034025.2	830	112022795	3' UTR	GGACA	55	0.94	0.999917	YES	NO	NO
ERP29	NC_000012.12	112013426	112023449	+	NM_001034025.2	978	112022943	3' UTR	ACAGA	25	0.958333	0.999976	NO	NO	hsa-miR-363-3p hsa-miR-363-3p
RPL14	NC_000003.12	40457339	40468587	+	NM_001034996.3	105	40457443	5'UTR	CAAAC	20	0.947368	0.999976	NO	NO	hsa-miR-1180-3p hsa-miR-222-3p
C18orf32	NC_000018.10	49477243	49487234	-	NM_001035005.4	485	49482306	3' UTR	GGACC	14	0.571429	0.999962	YES	YES	NO
ACOT1	NC_000014.9	73537143	73543796	+	NM_001037161.2	1321	73543431	CDS	GGAGA	17	1	0.999936	NO	NO	NO
ARL4A	NC_000007.14	12686903	12690958	+	NM_001037164.3	253	12688277	CDS	CCAGA	19	0.8125	0.999934	NO	NO	hsa-miR-320a-3p hsa-miR-320c hsa-miR-320a-3p hsa-miR-320c hsa-miR-320a-3p hsa-miR-320c
ARL4A	NC_000007.14	12686903	12690958	+	NM_001037164.3	255	12688279	CDS	AGACT	20	0.647059	0.999995	YES	YES	hsa-miR-196a-5p hsa-miR-320a-3p hsa-miR-320c hsa-miR-320a-3p hsa-miR-320c hsa-miR-320a-3p hsa-miR-320c
ARL4A	NC_000007.14	12686903	12690958	+	NM_001037164.3	316	12688340	CDS	GGACT	19	1	0.999941	YES	YES	NO
ARL4A	NC_000007.14	12686903	12690958	+	NM_001037164.3	532	12688556	CDS	GGACT	19	1	0.999996	YES	YES	hsa-miR-320a-3p
EIF3B	NC_000007.14	2354827	2380745	+	NM_001037283.2	2714	2380363	3' UTR	GGACT	33	0.69697	0.999989	YES	YES	hsa-miR-27a-3p hsa-miR-23a-3p hsa-miR-27b-3p hsa-miR-4454 hsa-miR-128-3p hsa-miR-26a-5p hsa-miR-132-3p hsa-miR-101-3p hsa-miR-1910-5p hsa-miR-128-3p hsa-miR-27b-3p hsa-miR-26a-5p hsa-miR-23b-3p hsa-miR-128-3p hsa-miR-23a-3p hsa-miR-582-5p hsa-miR-23a-3p hsa-miR-27b-3p hsa-miR-23a-3p hsa-miR-27a-3p hsa-miR-101-3p hsa-miR-27a-3p hsa-miR-27a-3p hsa-miR-128-3p hsa-miR-101-3p
DYNLL1	NC_000012.12	120469842	120498493	+	NM_001037494.2	548	120498219	3' UTR	GGACT	40	0.542857	0.999948	YES	NO	hsa-miR-101-3p hsa-miR-101-3p hsa-miR-101-3p hsa-miR-455-3p hsa-miR-5581-3p hsa-miR-101-3p hsa-miR-455-3p hsa-miR-101-3p hsa-miR-101-3p hsa-miR-183-5p hsa-miR-128-3p hsa-miR-183-5p hsa-miR-101-3p hsa-miR-455-3p hsa-miR-5581-3p hsa-miR-455-3p hsa-miR-101-3p hsa-miR-455-3p
DYNLL1	NC_000012.12	120469842	120498493	+	NM_001037494.2	586	120498257	3' UTR	GGACT	38	0.516129	0.999942	YES	NO	hsa-miR-17-3p hsa-miR-196b-5p hsa-miR-33b-3p hsa-miR-148b-5p hsa-miR-22-5p hsa-miR-24-3p hsa-miR-17-3p hsa-miR-17-3p hsa-miR-17-3p hsa-miR-17-3p hsa-miR-17-3p hsa-miR-454-3p hsa-miR-24-3p hsa-miR-148b-5p hsa-miR-17-3p hsa-miR-1910-5p hsa-miR-17-3p hsa-miR-17-3p hsa-miR-148b-5p hsa-miR-148b-5p hsa-miR-17-3p hsa-miR-148b-5p hsa-miR-17-3p hsa-miR-17-3p hsa-miR-17-3p
DYNLL1	NC_000012.12	120496113	120498493	+	NM_001037495.2	403	120498219	3' UTR	GGACT	55	0.596154	0.999941	YES	NO	hsa-miR-101-3p hsa-miR-101-3p hsa-miR-101-3p hsa-miR-455-3p hsa-miR-5581-3p hsa-miR-101-3p hsa-miR-455-3p hsa-miR-101-3p hsa-miR-101-3p hsa-miR-183-5p hsa-miR-128-3p hsa-miR-183-5p hsa-miR-101-3p hsa-miR-455-3p hsa-miR-5581-3p hsa-miR-455-3p hsa-miR-101-3p hsa-miR-455-3p
DYNLL1	NC_000012.12	120496113	120498493	+	NM_001037495.2	469	120498285	3' UTR	AGACT	56	0.72	0.99996	YES	NO	hsa-miR-30a-3p hsa-miR-30d-3p hsa-miR-30a-3p hsa-miR-30d-3p hsa-miR-9-5p
EIF3C	NC_000016.10	28711417	28735730	+	NM_001037808.2	2912	28735502	CDS	AGACG	23	1	0.999983	NO	NO	NO
HRCT1	NC_000009.12	35906202	35907136	+	NM_001039792.2	503	35906704	3' UTR	GGACC	38	0.157895	0.999931	YES	YES	NO
HRCT1	NC_000009.12	35906202	35907136	+	NM_001039792.2	559	35906760	3' UTR	AGACT	44	0.571429	0.999954	YES	YES	NO
OXLD1	NC_000017.11	81665036	81666605	-	NM_001039842.3	487	81665186	3' UTR	GGACT	46	0.577778	0.999977	YES	YES	NO
OXLD1	NC_000017.11	81665036	81666605	-	NM_001039842.3	552	81665121	3' UTR	AGACT	41	0.8	0.999993	YES	YES	NO
AGTRAP	NC_000001.11	11736136	11750769	+	NM_001040194.2	621	11750281	3' UTR	GGACC	13	0.615385	0.999971	YES	YES	hsa-miR-340-3p
COA3	NC_000017.11	42797625	42798704	-	NM_001040431.3	466	42797939	3' UTR	GGACC	97	0.309278	0.999927	YES	YES	NO
COA3	NC_000017.11	42797625	42798704	-	NM_001040431.3	493	42797912	3' UTR	GGACT	51	0.857143	0.999987	YES	YES	NO
YARS2	NC_000012.12	32746544	32755897	-	NM_001040436.3	1397	32747264	CDS	GGACT	20	0.9	0.999993	YES	NO	hsa-miR-148a-5p hsa-miR-26a-2-3p
YARS2	NC_000012.12	32746544	32755897	-	NM_001040436.3	1573	32747088	3' UTR	GGACT	31	0.387097	0.999973	YES	NO	NO
YARS2	NC_000012.12	32746544	32755897	-	NM_001040436.3	172	32755726	CDS	GGACT	19	0.833333	0.99996	YES	NO	NO
YARS2	NC_000012.12	32746544	32755897	-	NM_001040436.3	574	32755324	CDS	GGACT	24	0.75	0.999972	YES	NO	NO
ASB1	NC_000002.12	238426927	238452250	+	NM_001040445.3	1279	238446638	3' UTR	AGACT	10	1	0.999947	YES	YES	hsa-miR-34a-5p hsa-miR-34a-5p
SLC16A3	NC_000017.11	82228435	82240086	+	NM_001042422.3	1437	82238894	CDS	GGACT	22	0.636364	0.999993	YES	YES	NO
SLC16A3	NC_000017.11	82228435	82240086	+	NM_001042422.3	1596	82239053	3' UTR	GGACT	16	1	0.99999	YES	YES	hsa-miR-27a-5p hsa-miR-671-3p
SLC16A3	NC_000017.11	82228435	82240086	+	NM_001042422.3	1807	82239264	3' UTR	GGACC	25	0.478261	0.999932	YES	YES	hsa-miR-30e-3p
SLC16A3	NC_000017.11	82232232	82240086	+	NM_001042423.3	1470	82238894	CDS	GGACT	17	0.625	0.999983	YES	YES	NO
SLC16A3	NC_000017.11	82232232	82240086	+	NM_001042423.3	1629	82239053	3' UTR	GGACT	18	0.777778	0.999987	YES	YES	hsa-miR-27a-5p hsa-miR-671-3p
ABHD12	NC_000020.11	25300214	25390835	-	NM_001042472.3	1199	25302309	CDS	AGATT	17	0.692308	0.999994	NO	NO	hsa-miR-3184-3p
PIGY	NC_000004.12	88520998	88523776	-	NM_001042616.3	700	88521609	CDS	GGACT	33	0.71875	0.999986	YES	YES	hsa-miR-660-5p hsa-miR-660-5p hsa-miR-660-5p hsa-miR-660-5p
SDHAF1	NC_000019.10	35995188	35996312	+	NM_001042631.3	1096	35996283	3' UTR	GGACA	19	0.578947	0.999966	YES	YES	NO
SDHAF1	NC_000019.10	35995188	35996312	+	NM_001042631.3	503	35995690	3' UTR	GGACT	31	0.482759	0.999954	YES	YES	NO
SDHAF1	NC_000019.10	35995188	35996312	+	NM_001042631.3	539	35995726	3' UTR	AGACT	31	0.741935	0.999985	YES	YES	NO
SDHAF1	NC_000019.10	35995188	35996312	+	NM_001042631.3	568	35995755	3' UTR	AGACT	27	0.692308	0.999976	YES	YES	NO
SDHAF1	NC_000019.10	35995188	35996312	+	NM_001042631.3	612	35995799	3' UTR	GGACG	19	0.578947	0.999962	NO	NO	NO
SDHAF1	NC_000019.10	35995188	35996312	+	NM_001042631.3	692	35995879	3' UTR	GGACG	31	0.451613	0.999972	NO	YES	NO
SDHAF1	NC_000019.10	35995188	35996312	+	NM_001042631.3	872	35996059	3' UTR	AGACT	34	0.787879	0.999998	YES	YES	NO
DPH3	NC_000003.12	16257061	16264943	-	NM_001047434.3	425	16260580	3' UTR	GGATT	14	0.538462	0.999981	NO	NO	NO
SRD5A1	NC_000005.10	6633440	6674386	+	NM_001047.4	976	6668327	3' UTR	GGACT	30	0.724138	0.999992	YES	NO	hsa-miR-20b-5p
SMIM15	NC_000005.10	61157704	61162468	-	NM_001048249.4	409	61160183	5'UTR	AGACT	22	0.809524	0.999995	YES	YES	NO
SMIM15	NC_000005.10	61157704	61162468	-	NM_001048249.4	473	61160119	CDS	GGACC	30	0.666667	0.999988	YES	YES	hsa-miR-185-3p
PIERCE1	NC_000009.12	135495181	135499869	-	NM_001048265.2	527	135495329	3' UTR	AGACT	18	0.5625	0.999954	YES	YES	NO
TNFRSF1A	NC_000012.12	6328771	6342076	-	NM_001065.4	1548	6329394	CDS	GGACC	24	0.73913	0.999973	YES	NO	NO
TNFRSF1A	NC_000012.12	6328771	6342076	-	NM_001065.4	1569	6329373	CDS	GGACA	35	0.69697	0.999965	YES	NO	NO
TNFRSF1A	NC_000012.12	6328771	6342076	-	NM_001065.4	1659	6329283	3' UTR	GGACC	35	0.914286	0.999993	YES	NO	NO
TNFRSF1A	NC_000012.12	6328771	6342076	-	NM_001065.4	2138	6328804	3' UTR	GGACT	29	0.896552	0.999957	YES	NO	hsa-miR-19a-3p hsa-miR-19b-3p hsa-miR-19a-3p hsa-miR-19b-3p hsa-miR-3184-3p hsa-miR-140-3p hsa-miR-19b-3p hsa-miR-425-5p hsa-miR-19a-3p hsa-miR-19b-3p hsa-miR-19b-3p hsa-miR-19b-3p
TUBG1	NC_000017.11	42609683	42615238	+	NM_001070.5	1528	42615158	3' UTR	GGACT	95	0.835165	1	YES	YES	hsa-miR-421 hsa-miR-4709-5p hsa-miR-503-5p hsa-miR-203b-5p
METTL9	NC_000016.10	21599577	21657471	+	NM_001077180.3	1200	21655521	3' UTR	GGACC	11	0.636364	0.999972	YES	YES	NO
METTL9	NC_000016.10	21599577	21657471	+	NM_001077180.3	1411	21655732	3' UTR	GGACT	14	0.846154	0.999992	YES	YES	NO
SPPL2B	NC_000019.10	2328684	2355095	+	NM_001077238.2	2208	2353549	3' UTR	GGACT	8	0.875	0.999902	YES	YES	NO
DEPDC7	NC_000011.10	33015878	33033582	+	NM_001077242.2	389	33025896	CDS	GGACT	13	0.615385	0.999975	YES	YES	NO
IRF2BP2	NC_000001.11	234604269	234609525	-	NM_001077397.1	1435	234607449	CDS	GGACT	28	0.92	0.999943	YES	YES	hsa-miR-193a-3p hsa-miR-30e-3p hsa-miR-30d-3p hsa-miR-24-3p hsa-miR-1910-5p hsa-miR-141-5p hsa-miR-4664-3p hsa-miR-193a-3p hsa-miR-193b-3p
IRF2BP2	NC_000001.11	234604269	234609525	-	NM_001077397.1	1467	234607417	CDS	GGACT	25	0.96	0.999966	YES	YES	NO
IRF2BP2	NC_000001.11	234604269	234609525	-	NM_001077397.1	1747	234607137	CDS	TGACT	25	0.875	0.999982	YES	YES	hsa-miR-20a-5p hsa-miR-20a-5p hsa-miR-93-5p hsa-miR-93-5p hsa-miR-20a-5p hsa-miR-20a-5p hsa-miR-93-5p hsa-miR-93-5p
IRF2BP2	NC_000001.11	234604269	234609525	-	NM_001077397.1	2107	234606777	3' UTR	AAAAA	16	0.9375	0.999966	NO	NO	NO
IRF2BP2	NC_000001.11	234604269	234609525	-	NM_001077397.1	2108	234606776	3' UTR	AAAAA	18	0.944444	0.999963	NO	NO	NO
TSEN34	NC_000019.10	54191308	54194532	+	NM_001077446.4	1000	54193372	3' UTR	AGACC	18	0.5	0.999986	YES	NO	NO
GNAS	NC_000020.11	58891421	58911192	+	NM_001077488.5	1205	58910007	CDS	TGAGA	44	0.764706	0.99993	NO	NO	hsa-miR-365a-5p hsa-miR-3158-3p hsa-miR-3158-3p hsa-miR-365a-5p hsa-miR-3158-3p hsa-miR-365a-5p hsa-miR-3158-3p hsa-miR-365a-5p
GNAS	NC_000020.11	58891421	58911192	+	NM_001077488.5	1207	58910009	CDS	AGAAA	42	0.8125	0.999985	NO	NO	hsa-miR-365a-5p hsa-miR-3158-3p hsa-miR-3158-3p hsa-miR-365a-5p hsa-miR-3158-3p hsa-miR-365a-5p hsa-miR-3158-3p hsa-miR-365a-5p
GNAS	NC_000020.11	58891421	58911192	+	NM_001077488.5	1208	58910010	CDS	GAAAG	42	0.833333	0.999972	NO	NO	hsa-miR-365a-5p hsa-miR-3158-3p hsa-miR-3158-3p hsa-miR-365a-5p hsa-miR-3158-3p hsa-miR-365a-5p hsa-miR-3158-3p hsa-miR-365a-5p
RTL8C	NC_000023.11	135032355	135033546	+	NM_001078171.2	1026	135033380	3' UTR	GGACC	46	0.555556	0.999978	YES	YES	hsa-miR-200c-3p hsa-miR-200c-3p hsa-miR-200c-3p hsa-miR-200c-3p hsa-miR-200c-3p hsa-miR-31-5p hsa-miR-200c-3p
RTL8C	NC_000023.11	135032355	135033546	+	NM_001078171.2	817	135033171	3' UTR	AGACT	49	0.727273	0.999968	YES	YES	hsa-miR-15a-5p hsa-miR-15a-5p hsa-miR-15a-5p hsa-miR-15b-5p hsa-miR-16-5p hsa-miR-195-5p hsa-miR-34a-5p hsa-miR-424-5p hsa-miR-15a-5p hsa-miR-15b-5p hsa-miR-16-5p hsa-miR-424-5p hsa-miR-15a-5p hsa-miR-15b-5p hsa-miR-16-5p hsa-miR-195-5p hsa-miR-34a-5p hsa-miR-424-5p hsa-miR-15a-5p hsa-miR-15b-5p hsa-miR-16-5p hsa-miR-195-5p hsa-miR-424-5p hsa-miR-34a-5p hsa-miR-15a-5p hsa-miR-15b-5p hsa-miR-16-5p…
RTL8C	NC_000023.11	135032355	135033546	+	NM_001078171.2	839	135033193	3' UTR	GGACT	75	0.930556	1	YES	YES	hsa-let-7a-5p hsa-let-7g-5p hsa-let-7i-5p hsa-let-7a-5p hsa-let-7b-5p hsa-let-7f-5p hsa-let-7a-5p hsa-let-7b-5p hsa-let-7f-5p hsa-let-7a-5p hsa-let-7b-5p hsa-let-7f-5p hsa-let-7a-5p hsa-let-7f-5p hsa-let-7a-5p hsa-let-7b-5p hsa-let-7c-5p hsa-let-7d-5p hsa-let-7f-5p hsa-let-7g-5p hsa-let-7i-5p hsa-miR-98-5p hsa-let-7a-5p hsa-let-7b-5p hsa-let-7f-5p hsa-let-7a-5p hsa-let-7b-5p hsa-let-7c-5p hsa-let…
RTL8A	NC_000023.11	135050932	135052135	-	NM_001078172.2	1034	135051102	3' UTR	GGACC	22	0.5	0.999981	YES	YES	NO
RTL8A	NC_000023.11	135050932	135052135	-	NM_001078172.2	362	135051774	CDS	GGACT	21	0.7	0.999988	YES	YES	hsa-miR-203b-5p hsa-miR-1910-5p
RTL8A	NC_000023.11	135050932	135052135	-	NM_001078172.2	641	135051495	3' UTR	GGACG	20	0.55	0.999971	NO	NO	NO
RTL8A	NC_000023.11	135050932	135052135	-	NM_001078172.2	836	135051300	3' UTR	GGACT	35	0.878788	0.999967	YES	YES	hsa-let-7i-5p hsa-miR-98-5p
RTL8A	NC_000023.11	135050932	135052135	-	NM_001078172.2	953	135051183	3' UTR	AGACC	19	0.470588	0.99999	YES	YES	hsa-miR-330-5p hsa-miR-9-5p hsa-miR-9-5p
GLB1	NC_000003.12	32996617	33096822	-	NM_001079811.3	2009	32997099	CDS	AGACT	20	0.95	0.999986	YES	YES	NO
PRNP	NC_000020.11	4686456	4701588	+	NM_001080123.3	1325	4700254	3' UTR	GGACT	22	0.590909	0.999961	YES	YES	NO
PRNP	NC_000020.11	4686456	4701588	+	NM_001080123.3	1337	4700266	3' UTR	GGACT	24	0.363636	0.999964	YES	YES	hsa-miR-25-3p hsa-miR-92a-3p hsa-miR-25-3p hsa-miR-25-3p hsa-miR-92a-3p hsa-miR-92b-3p
PRNP	NC_000020.11	4686456	4701588	+	NM_001080123.3	2650	4701579	3' UTR	AGATG	18	0.5625	0.999972	NO	NO	NO
TMEM223	NC_000011.10	62789971	62792006	-	NM_001080501.3	564	62790680	CDS	GGACA	70	0.869565	0.999999	YES	YES	hsa-let-7b-5p
CACTIN	NC_000019.10	3610645	3626790	-	NM_001080543.2	3490	3610738	3' UTR	AGACT	9	1	0.999984	YES	YES	NO
GSTT2B	NC_000022.11	23957414	23961195	-	NM_001080843.4	989	23957533	3' UTR	AGACT	30	0.296296	0.999917	YES	NO	NO
COMMD5	NC_000008.11	144850176	144853048	-	NM_001081004.3	238	144851214	CDS	GGACC	21	0.65	0.999977	YES	YES	NO
COMMD5	NC_000008.11	144850176	144853048	-	NM_001081004.3	487	144850965	CDS	GGACT	23	0.714286	0.999993	YES	YES	NO
COMMD5	NC_000008.11	144850176	144853048	-	NM_001081004.3	776	144850676	CDS	AGACT	26	0.478261	0.999924	YES	YES	hsa-miR-20b-3p
COMMD5	NC_000008.11	144850176	144853048	-	NM_001081004.3	859	144850593	3' UTR	TGACT	24	0.571429	0.999907	YES	NO	NO
DNAAF2	NC_000014.9	49625174	49635244	-	NM_001083908.2	2482	49625525	3' UTR	GGACT	9	0.888889	0.999979	YES	YES	NO
UQCC3	NC_000011.10	62671673	62673686	+	NM_001085372.3	383	62672142	3' UTR	GGACC	60	0.310345	0.999945	YES	YES	NO
NADK2	NC_000005.10	36192589	36241925	-	NM_001085411.3	1555	36195045	3' UTR	AGACT	9	0.714286	0.999907	YES	YES	NO
NADK2	NC_000005.10	36192589	36241925	-	NM_001085411.3	1623	36194977	3' UTR	AGACA	9	0.666667	0.999956	YES	YES	NO
NDUFAF8	NC_000017.11	81239318	81241310	+	NM_001086521.2	519	81241264	3' UTR	AGACT	71	0.53125	0.999983	YES	YES	NO
ABCF1	NC_000006.12	30571442	30591522	+	NM_001090.3	2656	30590887	3' UTR	AGACT	13	1	0.999986	YES	YES	NO
ABCF1	NC_000006.12	30571442	30591522	+	NM_001090.3	2891	30591122	3' UTR	TGACT	19	0.941176	0.999923	YES	YES	hsa-miR-34a-5p
TXNRD1	NC_000012.12	104215779	104350307	+	NM_001093771.3	2532	104348979	3' UTR	GGACT	12	0.5	0.999926	YES	NO	hsa-miR-30e-5p
HNRNPF	NC_000010.11	43385618	43409186	-	NM_001098204.2	653	43387534	CDS	GGACT	18	0.833333	0.999982	YES	YES	hsa-miR-30c-1-3p hsa-miR-30c-2-3p hsa-miR-1910-5p hsa-miR-125b-5p
HNRNPF	NC_000010.11	43385618	43409186	-	NM_001098204.2	739	43387448	CDS	GGACC	26	0.28	0.999989	YES	YES	hsa-miR-139-5p hsa-miR-139-5p hsa-miR-139-5p hsa-miR-139-5p
HNRNPF	NC_000010.11	43385618	43409186	-	NM_001098204.2	945	43387242	CDS	GGACT	24	0.875	0.999999	YES	YES	hsa-miR-34a-5p hsa-miR-34a-5p hsa-miR-34a-5p hsa-miR-34a-5p hsa-miR-34a-5p hsa-miR-34a-5p hsa-miR-34a-5p hsa-miR-34a-5p
HNRNPF	NC_000010.11	43385618	43407778	-	NM_001098206.2	659	43387534	CDS	GGACT	12	0.909091	0.999995	YES	YES	hsa-miR-30c-1-3p hsa-miR-30c-2-3p hsa-miR-1910-5p hsa-miR-125b-5p
HNRNPF	NC_000010.11	43385618	43407778	-	NM_001098206.2	805	43387388	CDS	TGAGA	15	0.75	0.999901	NO	NO	hsa-miR-21-5p
HNRNPF	NC_000010.11	43385618	43407778	-	NM_001098206.2	951	43387242	CDS	GGACT	16	0.5625	0.999954	YES	YES	hsa-miR-34a-5p hsa-miR-34a-5p hsa-miR-34a-5p hsa-miR-34a-5p hsa-miR-34a-5p hsa-miR-34a-5p hsa-miR-34a-5p hsa-miR-34a-5p
HNRNPF	NC_000010.11	43385618	43397277	-	NM_001098207.2	982	43387242	CDS	GGACT	11	0.9	0.999964	YES	YES	hsa-miR-34a-5p hsa-miR-34a-5p hsa-miR-34a-5p hsa-miR-34a-5p hsa-miR-34a-5p hsa-miR-34a-5p hsa-miR-34a-5p hsa-miR-34a-5p
COPA	NC_000001.11	160288594	160343250	-	NM_001098398.2	4362	160289577	3' UTR	GGACA	28	0.5	0.999978	YES	YES	NO
GRSF1	NC_000004.12	70815783	70839261	-	NM_001098477.2	1281	70820726	3' UTR	GGACT	16	0.625	0.999985	YES	YES	hsa-miR-132-3p hsa-miR-139-5p
CHCHD4	NC_000003.12	14112077	14124870	-	NM_001098502.2	451	14113059	CDS	AGACT	16	0.933333	0.999979	YES	YES	NO
CHCHD4	NC_000003.12	14112077	14124870	-	NM_001098502.2	665	14112845	3' UTR	GGACC	15	0.642857	0.999994	YES	YES	NO
DDX17	NC_000022.11	38483438	38506311	-	NM_001098504.2	4532	38483673	3' UTR	GGACT	9	0.875	0.999914	YES	YES	NO
ZNF207	NC_000017.11	32350157	32381885	+	NM_001098507.2	1753	32369898	3' UTR	GGACA	15	0.642857	0.999957	YES	YES	hsa-miR-145-5p
HTATIP2	NC_000011.10	20363714	20383782	+	NM_001098521.2	887	20383277	3' UTR	AAAAA	35	0.931034	0.999936	NO	NO	NO
RPL31	NC_000002.12	101002289	101019724	+	NM_001098577.3	621	101019245	3' UTR	TAAGA	19	0.777778	0.999903	NO	NO	NO
RPL31	NC_000002.12	101002289	101019724	+	NM_001098577.3	623	101019247	3' UTR	AGACT	20	0.789474	0.999995	YES	YES	NO
FAM89B	NC_000011.10	65572538	65574190	+	NM_001098785.2	772	65573711	3' UTR	AGACT	13	0.727273	0.999989	YES	YES	hsa-miR-151a-5p hsa-miR-151b hsa-miR-423-3p hsa-miR-3184-3p
MID1IP1	NC_000023.11	38801459	38806532	+	NM_001098790.2	654	38805203	CDS	GGACA	11	1	0.999954	YES	YES	hsa-miR-210-3p hsa-miR-493-5p hsa-miR-210-3p hsa-let-7g-3p hsa-miR-210-3p hsa-miR-210-3p hsa-miR-24-3p hsa-miR-18a-5p
HIGD1A	NC_000003.12	42782908	42804490	-	NM_001099668.2	1217	42784677	3' UTR	TAATT	32	1	0.999981	NO	NO	NO
ACTB	NC_000007.14	5527148	5530601	-	NM_001101.5	1217	5527743	3' UTR	GGACT	215	0.4689	0.999973	YES	YES	hsa-miR-224-5p hsa-miR-26b-5p hsa-miR-26b-5p hsa-miR-26b-5p hsa-miR-26b-5p hsa-miR-505-5p hsa-miR-505-5p hsa-miR-505-5p hsa-miR-26b-5p hsa-miR-340-3p hsa-miR-331-5p hsa-miR-26b-5p hsa-miR-20a-3p hsa-miR-26b-5p hsa-miR-331-5p hsa-miR-340-3p hsa-miR-103b hsa-miR-26b-5p hsa-miR-31-5p hsa-miR-340-3p hsa-miR-324-5p
ACTB	NC_000007.14	5527148	5530601	-	NM_001101.5	446	5529162	CDS	CCAGA	73	0.754098	0.999912	NO	NO	NO
ACTN1	NC_000014.9	68874128	68979302	-	NM_001102.4	3114	68874670	3' UTR	AAAAA	13	0.923077	0.999966	NO	NO	NO
HENMT1	NC_000001.11	108648295	108661093	-	NM_001102592.2	1154	108648803	CDS	GGACC	36	0.194444	0.99997	YES	YES	NO
HENMT1	NC_000001.11	108648295	108661093	-	NM_001102592.2	1244	108648713	CDS	AGACT	25	0.64	0.999972	YES	YES	NO
DDX54	NC_000012.12	113157173	113185478	-	NM_001111322.2	2732	113158821	3' UTR	AGACG	26	0.291667	0.999912	NO	NO	NO
TEN1	NC_000017.11	75979240	76000586	+	NM_001113324.3	871	76000483	3' UTR	AGACT	16	0.846154	0.99996	YES	YES	NO
ELF3	NC_000001.11	202010587	202017183	+	NM_001114309.2	1392	202015357	3' UTR	GGACC	14	0.5	0.999943	YES	YES	hsa-miR-203b-5p
ELF3	NC_000001.11	202010587	202017183	+	NM_001114309.2	1520	202015485	3' UTR	GGACT	15	0.866667	0.99999	YES	YES	NO
ELF3	NC_000001.11	202010587	202017183	+	NM_001114309.2	1770	202015735	3' UTR	GGACT	18	0.941176	0.999996	YES	YES	NO
CD55	NC_000001.11	207321678	207360966	+	NM_001114752.3	1393	207359651	CDS	AGACT	26	0.375	0.999926	YES	YES	NO
GLRX	NC_000005.10	95813849	95822726	-	NM_001118890.2	390	95816508	3' UTR	ACAGA	22	0.65	0.999943	NO	NO	NO
CDKN1C	NC_000011.10	2883218	2885775	-	NM_001122630.2	1354	2883637	3' UTR	AAAAA	60	0.962264	0.999951	NO	NO	NO
CDKN1C	NC_000011.10	2883218	2885775	-	NM_001122630.2	1371	2883620	3' UTR	AAAAA	58	0.880952	0.99995	NO	NO	NO
CDKN1C	NC_000011.10	2883218	2885775	-	NM_001122631.2	1349	2883637	3' UTR	AAAAA	12	1	0.999954	NO	NO	NO
SLC50A1	NC_000001.11	155135852	155138853	+	NM_001122837.2	738	155138417	3' UTR	GGACC	13	0.384615	0.999922	YES	YES	NO
BCKDK	NC_000016.10	31108386	31112838	+	NM_001122957.4	1329	31111991	CDS	GGACA	15	0.642857	0.999993	YES	YES	NO
BCKDK	NC_000016.10	31108386	31112838	+	NM_001122957.4	1734	31112396	3' UTR	GGACT	15	1	0.999956	YES	YES	NO
HDGF	NC_000001.11	156742107	156752232	-	NM_001126051.1	1195	156743085	3' UTR	GGACC	101	0.11	0.999954	YES	YES	NO
ADM	NC_000011.10	10305073	10307397	+	NM_001124.3	662	10306567	CDS	GGACT	22	0.863636	0.999966	YES	YES	NO
ADSS2	NC_000001.11	244408494	244451909	-	NM_001126.5	1511	244409538	3' UTR	AGACT	21	0.761905	0.999986	YES	YES	NO
PCID2	NC_000013.11	113177536	113208669	-	NM_001127202.4	1457	113177976	3' UTR	AGACT	13	0.769231	0.999964	YES	YES	NO
PCID2	NC_000013.11	113177536	113208669	-	NM_001127202.4	1485	113177948	3' UTR	AGACT	18	0.4375	0.999933	YES	YES	NO
CD59	NC_000011.10	33703010	33722949	-	NM_001127227.2	364	33710200	CDS	GGACA	23	0.434783	0.999973	YES	YES	NO
CBX1	NC_000017.11	48070059	48101478	-	NM_001127228.2	1636	48070605	3' UTR	AGAAG	22	0.95	0.999934	NO	NO	NO
TMEM129	NC_000004.12	1715952	1721323	-	NM_001127266.2	1728	1717027	3' UTR	GGACT	11	0.8	0.99996	YES	YES	NO
PLAAT3	NC_000011.10	63574462	63614433	-	NM_001128203.2	600	63574937	3' UTR	AAAGA	46	0.828571	0.999948	NO	NO	NO
PLAAT3	NC_000011.10	63574462	63614433	-	NM_001128203.2	602	63574935	3' UTR	AGACT	46	0.704545	0.999968	YES	YES	NO
TOMM40	NC_000019.10	44891254	44903689	+	NM_001128917.2	1727	44903648	3' UTR	AAAAA	20	0.944444	0.999948	NO	NO	NO
KARS1	NC_000016.10	75627724	75647665	-	NM_001130089.2	1408	75631466	CDS	TGAGA	31	1	0.999992	NO	NO	hsa-miR-26a-5p hsa-miR-26a-5p hsa-miR-27a-5p
KARS1	NC_000016.10	75627724	75647665	-	NM_001130089.2	1410	75631464	CDS	AGAAA	28	1	0.999996	NO	NO	hsa-miR-6764-5p hsa-miR-1266-5p hsa-miR-27a-5p
KARS1	NC_000016.10	75627724	75647665	-	NM_001130089.2	1411	75631463	CDS	GAAAG	28	0.96	0.99999	NO	NO	hsa-miR-6764-5p hsa-miR-1266-5p hsa-miR-2355-5p hsa-miR-27a-5p
ABHD17A	NC_000019.10	1876810	1885496	-	NM_001130111.2	1450	1877066	3' UTR	GGACG	33	0.8125	0.999996	NO	NO	NO
ITPRID2	NC_000002.12	181891730	181930738	+	NM_001130445.3	2819	181916122	CDS	GGACT	9	0.888889	0.999907	YES	YES	hsa-miR-196a-5p hsa-miR-196b-5p hsa-miR-196a-5p hsa-miR-196a-5p hsa-miR-196b-5p hsa-miR-196a-5p hsa-miR-196b-5p hsa-miR-196a-5p hsa-miR-196b-5p hsa-miR-196a-5p
TLE5	NC_000019.10	3052910	3062495	-	NM_001130.6	1659	3053049	3' UTR	AAAAA	23	0.904762	0.999936	NO	NO	NO
RTL8A	NC_000023.11	135050932	135052135	-	NM_001134321.2	288	135051300	3' UTR	GGACT	48	0.697674	0.999964	YES	YES	hsa-let-7i-5p hsa-miR-98-5p
RTL8A	NC_000023.11	135050932	135052135	-	NM_001134321.2	405	135051183	3' UTR	AGACC	28	0.48	0.999991	YES	YES	hsa-miR-330-5p hsa-miR-9-5p hsa-miR-9-5p
RTL8A	NC_000023.11	135050932	135052135	-	NM_001134321.2	486	135051102	3' UTR	GGACC	27	0.269231	0.999986	YES	YES	NO
PSMG3	NC_000007.14	1567332	1570032	-	NM_001134340.2	478	1567634	3' UTR	GGACT	39	0.722222	0.999928	YES	YES	NO
PSMG3	NC_000007.14	1567332	1570032	-	NM_001134340.2	546	1567566	3' UTR	AAAGA	50	0.877551	0.999989	NO	NO	NO
SIGIRR	NC_000011.10	405716	417397	-	NM_001135053.2	1291	406384	CDS	GGACT	16	0.384615	0.99993	YES	YES	NO
TKT	NC_000003.12	53224712	53256022	-	NM_001135055.3	2500	53225067	3' UTR	GGACT	10	0.9	0.999981	YES	YES	NO
DNAJA3	NC_000016.10	4425868	4456775	+	NM_001135110.3	1628	4455820	3' UTR	TTAGA	29	0.758621	0.999936	NO	NO	NO
DNAJA3	NC_000016.10	4425868	4456775	+	NM_001135110.3	1630	4455822	3' UTR	AGACT	29	0.615385	0.999945	YES	YES	NO
LDHA	NC_000011.10	18394563	18408425	+	NM_001135239.2	1040	18407398	3' UTR	GGACT	89	0.518987	0.999934	YES	YES	hsa-miR-30e-3p hsa-miR-1180-3p hsa-miR-1910-5p hsa-miR-148b-3p hsa-miR-148b-3p hsa-miR-340-3p hsa-miR-24-3p hsa-miR-34a-5p
NDRG1	NC_000008.11	133237175	133297252	-	NM_001135242.2	1746	133238851	3' UTR	GGACT	11	1	0.999995	YES	YES	NO
RPS27A	NC_000002.12	55231903	55235853	+	NM_001135592.2	714	55235597	3' UTR	AGACA	516	0.0721248	0.999927	YES	YES	NO
RPS27A	NC_000002.12	55231903	55235853	+	NM_001135592.2	716	55235599	3' UTR	ACATG	462	0.05	0.999915	NO	NO	NO
FDPS	NC_000001.11	155308866	155320665	+	NM_001135821.2	1261	155319918	CDS	CCAGA	28	0.913043	0.999976	NO	NO	NO
APP	NC_000021.9	25880550	26140390	-	NM_001136016.3	3192	25880915	3' UTR	CAATT	26	1	0.999907	NO	NO	hsa-miR-182-5p hsa-miR-182-5p hsa-miR-182-5p hsa-miR-182-5p hsa-miR-182-5p hsa-miR-182-5p
TMUB1	NC_000007.14	151081085	151083493	-	NM_001136044.2	551	151081829	CDS	CCAGA	21	0.882353	0.999981	NO	NO	hsa-miR-423-3p
TMUB1	NC_000007.14	151081085	151083493	-	NM_001136044.2	872	151081508	3' UTR	GGACC	36	0.628571	0.999994	YES	YES	NO
TMUB1	NC_000007.14	151081085	151083493	-	NM_001136044.2	974	151081406	3' UTR	GGACT	40	0.484848	0.999912	YES	YES	NO
DHRS1	NC_000014.9	24290598	24299780	-	NM_001136050.3	1211	24290814	3' UTR	GGACT	14	0.769231	0.999988	YES	NO	NO
R3HCC1	NC_000008.11	23288108	23296279	+	NM_001136108.3	649	23290198	CDS	GGACC	14	0.571429	0.99997	YES	YES	NO
APP	NC_000021.9	25880550	26170770	-	NM_001136130.3	2094	25891821	CDS	GGACT	13	0.583333	0.999956	YES	YES	hsa-miR-197-3p hsa-let-7f-5p
APP	NC_000021.9	25880550	26170770	-	NM_001136130.3	3050	25880915	3' UTR	CAATT	21	1	0.99995	NO	NO	hsa-miR-182-5p hsa-miR-182-5p hsa-miR-182-5p hsa-miR-182-5p hsa-miR-182-5p hsa-miR-182-5p
ISOC2	NC_000019.10	55452985	55461642	-	NM_001136201.2	1032	55453028	3' UTR	AGACT	29	0.423077	0.999953	YES	YES	hsa-miR-27a-3p hsa-miR-27b-3p hsa-miR-128-3p
ISOC2	NC_000019.10	55452985	55461642	-	NM_001136201.2	1046	55453014	3' UTR	GGACT	21	0.6	0.999991	YES	YES	NO
ISOC2	NC_000019.10	55452985	55461642	-	NM_001136201.2	930	55453130	3' UTR	AGACT	29	0.928571	0.999991	YES	YES	NO
DAZAP2	NC_000012.12	51238826	51243933	+	NM_001136268.2	893	51243008	3' UTR	AGAAA	16	1	0.999948	NO	NO	hsa-miR-29a-5p hsa-miR-151a-3p hsa-miR-103a-2-5p hsa-miR-103a-2-5p hsa-miR-30e-3p hsa-miR-29b-1-5p hsa-miR-193b-3p hsa-miR-29b-1-5p hsa-miR-151a-3p hsa-miR-30e-3p hsa-miR-6842-3p hsa-miR-378c hsa-miR-151a-3p hsa-miR-9-5p hsa-miR-193b-3p hsa-miR-1304-3p hsa-miR-151a-3p hsa-miR-193b-3p
C11orf86	NC_000011.10	66975304	66977009	+	NM_001136485.3	516	66976360	3' UTR	GGACT	19	0.8125	0.999994	YES	YES	NO
C11orf86	NC_000011.10	66975304	66977009	+	NM_001136485.3	692	66976536	3' UTR	GGACT	21	0.952381	0.999992	YES	YES	NO
C11orf86	NC_000011.10	66975304	66977009	+	NM_001136485.3	744	66976588	3' UTR	GGACG	18	0.333333	0.999929	NO	NO	NO
C11orf86	NC_000011.10	66975304	66977009	+	NM_001136485.3	825	66976669	3' UTR	GGACG	15	0.923077	0.999928	NO	NO	NO
ANAPC5	NC_000012.12	121308245	121354209	-	NM_001137559.1	2175	121308434	3' UTR	GGACT	13	0.583333	0.999948	YES	NO	NO
BCAP31	NC_000023.11	153700492	153724127	-	NM_001139441.1	1084	153700750	3' UTR	TGATT	15	0.846154	0.999919	NO	NO	NO
MORF4L2	NC_000023.11	103675498	103688047	-	NM_001142419.2	739	103676615	CDS	GGACT	21	0.809524	0.999998	YES	YES	NO
MORF4L2	NC_000023.11	103675498	103688047	-	NM_001142421.2	688	103676615	CDS	GGACT	20	0.947368	0.999988	YES	YES	NO
MORF4L2	NC_000023.11	103675498	103686699	-	NM_001142423.2	698	103676615	CDS	GGACT	44	0.818182	0.99999	YES	YES	NO
MORF4L2	NC_000023.11	103675498	103686699	-	NM_001142425.2	718	103676615	CDS	GGACT	13	0.916667	0.999989	YES	YES	NO
EFTUD2	NC_000017.11	44849948	44899445	-	NM_001142605.2	2900	44851265	3' UTR	GGACT	18	0.722222	0.99997	YES	YES	NO
C1orf122	NC_000001.11	37807790	37809454	+	NM_001142726.2	870	37809128	3' UTR	GGACT	56	0.66	0.999993	YES	YES	hsa-miR-4664-3p
KNSTRN	NC_000015.10	40382721	40394288	+	NM_001142762.1	1132	40393725	3' UTR	AGACT	12	0.909091	0.999907	YES	YES	NO
PIEZO1	NC_000016.10	88715338	88785220	-	NM_001142864.4	7805	88715622	CDS	GGACT	64	0.671875	0.999995	YES	YES	hsa-miR-27a-3p hsa-miR-27a-3p
LRRC61	NC_000007.14	150323355	150338156	+	NM_001142928.2	525	150336866	CDS	GGACC	15	0.6	0.999968	YES	YES	NO
LRRC61	NC_000007.14	150323355	150338156	+	NM_001142928.2	646	150336987	CDS	GGACT	18	1	0.999999	YES	YES	NO
ZBED5	NC_000011.10	10852706	10858053	-	NM_001143667.2	2219	10853174	CDS	GGACT	10	1	0.999935	YES	YES	NO
SGK1	NC_000006.12	134169256	134175714	-	NM_001143678.2	2092	134169567	3' UTR	GGACC	37	0.243243	0.999962	YES	YES	hsa-miR-133a-3p
PYM1	NC_000012.12	55901413	55927125	-	NM_001143853.1	459	55902041	CDS	TGAGA	23	1	0.999998	NO	NO	NO
PYM1	NC_000012.12	55901413	55927125	-	NM_001143853.1	461	55902039	CDS	AGAAA	22	1	0.999985	NO	NO	hsa-miR-9-5p
PYM1	NC_000012.12	55901413	55927125	-	NM_001143853.1	462	55902038	CDS	GAAAG	22	0.95	0.999952	NO	NO	hsa-miR-9-5p
COPS2	NC_000015.10	49122727	49155599	-	NM_001143887.2	1324	49128000	CDS	GGACC	16	0.933333	0.999989	YES	YES	hsa-miR-1306-3p hsa-miR-571 hsa-miR-133a-3p hsa-miR-133b hsa-miR-133a-3p hsa-miR-380-5p hsa-miR-876-3p hsa-miR-1468-5p
L1CAM	NC_000023.11	153861514	153875944	-	NM_001143963.2	4221	153862297	3' UTR	GGACC	32	0.34375	0.999987	YES	YES	NO
PTPMT1	NC_000011.10	47565599	47573461	+	NM_001143984.2	524	47571606	3' UTR	GGACT	19	0.947368	0.999986	YES	YES	hsa-miR-106a-5p hsa-miR-19a-3p hsa-miR-19b-3p
UBAC2	NC_000013.11	99200854	99386504	+	NM_001144072.2	1517	99385762	3' UTR	GGACT	16	0.733333	0.999993	YES	YES	NO
SLC44A2	NC_000019.10	10602455	10644557	+	NM_001145056.2	2408	10643602	3' UTR	AGACT	29	0.769231	0.999988	YES	YES	NO
SLC44A2	NC_000019.10	10602455	10644557	+	NM_001145056.2	2609	10643803	3' UTR	GGACT	25	0.809524	0.999907	YES	YES	hsa-miR-423-5p hsa-miR-30e-3p hsa-miR-423-5p hsa-miR-30e-3p
SLC44A2	NC_000019.10	10602455	10644557	+	NM_001145056.2	2691	10643885	3' UTR	GGACA	16	0.5	0.999968	YES	YES	hsa-miR-190b-5p hsa-miR-190b-5p hsa-miR-454-3p
SLC1A5	NC_000019.10	46774883	46784814	-	NM_001145145.2	1282	46775465	3' UTR	GGACA	16	0.857143	0.999973	YES	YES	hsa-miR-130b-3p
YBX3	NC_000012.12	10699089	10723323	-	NM_001145426.2	1271	10699542	3' UTR	GGACA	34	0.71875	0.999989	YES	NO	hsa-miR-181b-5p hsa-miR-181b-5p hsa-miR-19a-3p hsa-miR-181a-5p hsa-miR-181b-5p hsa-miR-19a-3p hsa-miR-181b-5p hsa-miR-19a-3p
SMIM20	NC_000004.12	25914220	25929812	+	NM_001145432.3	444	25929337	3' UTR	AGACT	17	1	0.99998	YES	YES	NO
YPEL3	NC_000016.10	30092314	30096213	-	NM_001145524.2	696	30092557	3' UTR	TGACC	15	0.928571	0.999909	YES	NO	hsa-miR-27a-3p hsa-miR-27a-3p hsa-miR-183-5p
RBM17	NC_000010.11	6089346	6117447	+	NM_001145547.2	1967	6115673	3' UTR	GGACT	15	0.642857	0.999974	YES	YES	hsa-miR-148a-5p hsa-miR-22-5p
TXNDC5	NC_000006.12	7881517	7910077	-	NM_001145549.4	1628	7882817	3' UTR	GGACT	16	0.75	0.999978	YES	YES	hsa-miR-221-3p hsa-miR-221-3p hsa-miR-221-3p hsa-miR-221-3p
SNCA	NC_000004.12	89724099	89837161	-	NM_001146054.2	614	89822382	CDS	TGAGA	14	0.916667	0.999987	NO	NO	hsa-miR-133a-3p hsa-miR-133b
MOGS	NC_000002.12	74461057	74465382	-	NM_001146158.2	2316	74461282	CDS	AGACT	16	0.8	0.999954	YES	YES	hsa-miR-27a-3p hsa-miR-27b-3p hsa-miR-30a-3p hsa-miR-30e-3p
SLC25A4	NC_000004.12	185143266	185150382	+	NM_001151.4	511	185145056	CDS	GGACT	23	0.73913	0.999977	YES	YES	hsa-miR-106a-5p hsa-miR-106b-5p hsa-miR-20a-5p hsa-miR-106b-5p
ANXA6	NC_000005.10	151100706	151157779	-	NM_001155.5	1020	151129430	CDS	AGAAG	14	1	0.999968	NO	NO	hsa-miR-423-5p hsa-miR-423-5p hsa-miR-423-5p hsa-miR-4525 hsa-miR-423-5p hsa-miR-423-5p hsa-miR-423-5p hsa-miR-423-5p
GUK1	NC_000001.11	228140279	228148951	+	NM_001159390.2	926	228148942	3' UTR	TTAGA	26	0.95	0.999914	NO	NO	NO
SYNCRIP	NC_000006.12	85607784	85642886	-	NM_001159677.2	1956	85612717	3' UTR	GGACT	7	1	0.99998	YES	YES	hsa-miR-1297 hsa-miR-26b-5p hsa-miR-26b-5p hsa-miR-26a-5p hsa-miR-26b-5p hsa-miR-19b-3p hsa-miR-26a-5p hsa-miR-26b-5p hsa-miR-106a-5p hsa-miR-17-5p hsa-miR-19b-3p hsa-miR-20a-5p hsa-miR-20b-5p hsa-miR-93-5p
C15orf40	NC_000015.10	83004393	83011639	-	NM_001160114.2	461	83004910	CDS	GGACT	14	0.615385	0.999935	YES	YES	NO
ATP1A1	NC_000001.11	116383370	116404774	+	NM_001160234.2	3054	116401586	CDS	AGAGA	49	0.9375	0.999944	NO	NO	hsa-miR-4446-3p hsa-miR-4446-3p
TLCD1	NC_000017.11	28724348	28726932	-	NM_001160407.2	792	28724445	3' UTR	GGACT	11	0.909091	0.999946	YES	YES	NO
ALDH3B1	NC_000011.10	68008547	68029276	+	NM_001161473.3	2321	68028706	3' UTR	GGACT	13	0.846154	0.999959	YES	YES	NO
SMIM10	NC_000023.11	134990991	134992473	+	NM_001163438.2	835	134991825	3' UTR	AGACC	33	0.290323	0.999919	YES	YES	NO
DHCR7	NC_000011.10	71434411	71448393	-	NM_001163817.2	1585	71435430	CDS	GGACT	23	0.857143	0.999956	YES	YES	hsa-miR-27b-3p hsa-miR-27a-3p hsa-miR-199a-5p hsa-miR-30e-3p hsa-miR-27a-3p hsa-miR-30d-3p hsa-miR-27b-3p
DHCR7	NC_000011.10	71434411	71448393	-	NM_001163817.2	1869	71435146	3' UTR	GGATT	17	0.625	0.999967	NO	NO	NO
DHCR7	NC_000011.10	71434411	71448393	-	NM_001163817.2	2177	71434838	3' UTR	GGACA	21	0.8	0.999982	YES	YES	NO
DHCR7	NC_000011.10	71434411	71448393	-	NM_001163817.2	2327	71434688	3' UTR	CGATT	23	0.8	0.999978	NO	NO	hsa-miR-423-5p hsa-miR-128-3p
PLIN3	NC_000019.10	4838341	4867667	-	NM_001164189.2	1353	4839217	CDS	TGAGA	13	0.923077	0.999993	NO	NO	hsa-miR-139-5p
PLIN3	NC_000019.10	4838341	4867667	-	NM_001164189.2	1355	4839215	CDS	AGAAA	14	0.923077	0.999985	NO	NO	hsa-miR-139-5p
PLIN3	NC_000019.10	4838341	4867667	-	NM_001164189.2	1356	4839214	CDS	GAAAG	14	0.846154	0.999981	NO	NO	NO
PLIN3	NC_000019.10	4838341	4867667	-	NM_001164194.2	1320	4839217	CDS	TGAGA	12	0.818182	0.999991	NO	NO	hsa-miR-139-5p
PLIN3	NC_000019.10	4838341	4867667	-	NM_001164194.2	1360	4839177	3' UTR	GGACT	14	0.833333	0.999941	YES	YES	NO
PET117	NC_000020.11	18137863	18143169	+	NM_001164811.2	788	18142806	3' UTR	GGACT	30	0.866667	0.999991	YES	YES	NO
SMIM12	NC_000001.11	34850362	34859749	-	NM_001164825.2	521	34855757	CDS	GGACA	9	1	0.999954	YES	YES	hsa-miR-21-5p
LDHA	NC_000011.10	18396351	18408425	+	NM_001165414.2	1400	18407398	3' UTR	GGACT	365	0.675214	0.999912	YES	YES	hsa-miR-30e-3p hsa-miR-1180-3p hsa-miR-1910-5p hsa-miR-148b-3p hsa-miR-148b-3p hsa-miR-340-3p hsa-miR-24-3p hsa-miR-34a-5p
LDHA	NC_000011.10	18394563	18408425	+	NM_001165416.2	1090	18407398	3' UTR	GGACT	68	0.564516	0.99998	YES	YES	hsa-miR-30e-3p hsa-miR-1180-3p hsa-miR-1910-5p hsa-miR-148b-3p hsa-miR-148b-3p hsa-miR-340-3p hsa-miR-24-3p hsa-miR-34a-5p
CD320	NC_000019.10	8302127	8308358	-	NM_001165895.2	1076	8302178	3' UTR	AGACA	19	0.333333	0.99994	YES	YES	NO
CD320	NC_000019.10	8302127	8308358	-	NM_001165895.2	968	8302286	3' UTR	GGACA	20	0.6	0.999978	YES	YES	NO
HES7	NC_000017.11	8120592	8124106	-	NM_001165967.2	480	8121806	CDS	GGACC	23	0.434783	0.999974	YES	YES	NO
HES7	NC_000017.11	8120592	8124106	-	NM_001165967.2	622	8121664	CDS	GGACT	19	1	0.999934	YES	YES	NO
HES7	NC_000017.11	8120592	8124106	-	NM_001165967.2	759	8121527	3' UTR	AGACT	27	0.695652	0.99999	YES	YES	NO
FAM104B	NC_000023.11	55143102	55161185	-	NM_001166701.4	387	55146074	3' UTR	GGACT	15	0.666667	0.999984	YES	YES	NO
C4orf3	NC_000004.12	119296419	119304445	-	NM_001170330.1	719	119298660	3' UTR	GGACC	63	0.163934	0.999967	YES	YES	hsa-miR-423-5p hsa-miR-423-5p
CHD8	NC_000014.9	21385199	21456123	-	NM_001170629.2	8116	21385550	3' UTR	GGACT	8	1	0.999976	YES	YES	NO
ATRAID	NC_000002.12	27212041	27217157	+	NM_001170795.4	342	27212382	CDS	CGACC	16	1	0.999968	NO	NO	NO
ZBED1_1	NC_000024.10	2486435	2500625	-	NM_001171135.2	4381	2486707	3' UTR	GGACA	15	0.666667	0.999977	YES	NO	NO
ZBED1_1	NC_000024.10	2486435	2500976	-	NM_001171136.2	4470	2486463	3' UTR	GGACT	7	0.714286	0.999908	YES	NO	NO
CYB5R3	NC_000022.11	42617840	42646989	-	NM_001171661.1	1985	42618838	3' UTR	AAAAA	11	0.9	0.999944	NO	NO	NO
PGM1	NC_000001.11	63623216	63660245	+	NM_001172818.1	2097	63659784	3' UTR	TGACT	23	0.545455	0.999975	YES	YES	NO
PGM1	NC_000001.11	63623216	63660245	+	NM_001172818.1	2181	63659868	3' UTR	GGACC	21	0.555556	0.999943	YES	YES	NO
PGM1	NC_000001.11	63593809	63660245	+	NM_001172819.2	1972	63659868	3' UTR	GGACC	13	0.583333	0.999983	YES	YES	NO
YTHDF2	NC_000001.11	28736624	28769775	+	NM_001173128.2	2080	28769032	3' UTR	GGACT	16	0.857143	0.999946	YES	YES	hsa-miR-106a-5p
RABL6	NC_000009.12	136807948	136834419	+	NM_001173989.4	1034	136833799	CDS	GGACT	31	0.9	0.999996	YES	YES	NO
RABL6	NC_000009.12	136807948	136834419	+	NM_001173989.4	1242	136834007	3' UTR	GGACC	33	0.28125	0.999968	YES	YES	NO
PRR7	NC_000005.10	177446814	177456286	+	NM_001174101.2	1245	177456155	3' UTR	GGACT	11	0.909091	0.999993	YES	YES	NO
RPS27A	NC_000002.12	55232678	55235853	+	NM_001177413.1	638	55235597	3' UTR	AGACA	644	0.059098	0.999933	YES	YES	NO
ECI1	NC_000016.10	2239402	2251587	-	NM_001178029.2	832	2240026	CDS	AGAAG	27	0.956522	0.999972	NO	NO	hsa-miR-365a-5p hsa-miR-4510 hsa-miR-873-5p hsa-miR-876-5p
ATP6AP1	NC_000023.11	154428677	154436516	+	NM_001183.6	1502	154435964	3' UTR	GGACT	98	0.517241	0.999981	YES	YES	NO
FLAD1	NC_000001.11	154983344	154989012	+	NM_001184892.2	1356	154988542	CDS	GGACT	12	0.909091	0.999933	YES	YES	NO
CNPY2	NC_000012.12	56314495	56316346	-	NM_001190991.3	827	56314779	3' UTR	GGACC	39	0.558824	0.999945	YES	NO	NO
CNPY2	NC_000012.12	56314495	56316346	-	NM_001190991.3	857	56314749	3' UTR	AGACT	38	0.714286	0.999996	YES	NO	NO
ENY2	NC_000008.11	109334347	109345954	+	NM_001193557.2	117	109336188	CDS	AAACT	46	0.285714	0.999954	YES	YES	hsa-miR-139-5p
HCN2	NC_000019.10	589881	617159	+	NM_001194.4	2701	616440	CDS	GGACT	15	0.769231	0.999983	YES	YES	NO
EIF4G1	NC_000003.12	184314606	184335353	+	NM_001194946.2	5016	184334943	3' UTR	GGACA	10	0.75	0.999956	YES	YES	NO
EIF4G1	NC_000003.12	184314606	184335353	+	NM_001194946.2	5045	184334972	3' UTR	GGACT	14	0.642857	0.999966	YES	YES	hsa-miR-139-5p hsa-miR-455-3p hsa-miR-139-5p hsa-miR-455-3p
EIF4G1	NC_000003.12	184314606	184335353	+	NM_001194947.2	4988	184334972	3' UTR	GGACT	14	0.785714	0.999963	YES	YES	hsa-miR-139-5p hsa-miR-455-3p hsa-miR-139-5p hsa-miR-455-3p
CCDC107	NC_000009.12	35658292	35661511	+	NM_001195200.2	636	35660964	CDS	GGACT	10	0.666667	0.999926	YES	YES	NO
DCXR	NC_000017.11	82035881	82037697	-	NM_001195218.1	572	82036259	CDS	CCAGG	22	1	0.999934	NO	NO	NO
RAB9A	NC_000023.11	13689128	13710504	+	NM_001195328.2	346	13708905	CDS	GGACA	20	0.944444	0.99998	YES	YES	hsa-miR-194-5p
RAB9A	NC_000023.11	13689128	13710504	+	NM_001195328.2	943	13709502	3' UTR	GGACA	29	0.384615	0.999969	YES	YES	hsa-miR-576-3p
MICU1	NC_000010.11	72367340	72626079	-	NM_001195518.2	1480	72368217	CDS	GGACT	32	0.580645	0.999978	YES	YES	hsa-miR-9-3p
MICU1	NC_000010.11	72367340	72626079	-	NM_001195518.2	1628	72368069	3' UTR	GGACT	23	1	0.999994	YES	YES	hsa-miR-4454 hsa-miR-203b-5p
CAPN1	NC_000011.10	65181794	65212006	+	NM_001198869.2	2796	65211886	3' UTR	GGACT	15	0.642857	0.999955	YES	YES	NO
CAPN1	NC_000011.10	65181794	65212006	+	NM_001198869.2	2807	65211897	3' UTR	GGACT	15	0.714286	0.999964	YES	YES	hsa-miR-6882-5p
ATP6V1F	NC_000007.14	128862856	128865847	+	NM_001198909.2	497	128865582	3' UTR	GGACT	10	0.6	0.999955	YES	YES	hsa-let-7b-5p hsa-miR-423-5p hsa-let-7b-5p hsa-let-7f-5p hsa-let-7f-5p
NFS1	NC_000020.11	35668052	35699352	-	NM_001198989.2	1538	35669369	3' UTR	AGACA	13	0.846154	0.999987	YES	YES	NO
EIF3C	NC_000016.10	28688558	28735730	+	NM_001199142.1	3032	28735502	CDS	AGACG	10	1	0.999906	NO	NO	NO
C18orf32	NC_000018.10	49477243	49487234	-	NM_001199346.2	321	49482306	3' UTR	GGACC	15	0.733333	0.999972	YES	YES	NO
NCOA7	NC_000006.12	125919255	125932034	+	NM_001199622.2	797	125928806	3' UTR	AGACT	10	1	0.999944	YES	YES	NO
ACTG1	NC_000017.11	81509971	81512799	-	NM_001199954.3	1324	81510685	3' UTR	GGACT	315	0.626263	0.999915	YES	YES	hsa-miR-125a-5p hsa-miR-128-1-5p hsa-miR-125a-5p
BMP2	NC_000020.11	6767686	6780246	+	NM_001200.4	1846	6778547	CDS	GGACT	7	1	0.999927	YES	YES	NO
NIPSNAP1	NC_000022.11	29554808	29581113	-	NM_001202502.2	1130	29555631	3' UTR	CCACC	22	1	0.999916	NO	NO	NO
SRP19	NC_000005.10	112861287	112868395	+	NM_001204193.2	820	112867800	3' UTR	GGACT	10	1	0.999993	YES	YES	hsa-miR-5701 hsa-miR-92b-3p
SSR4	NC_000023.11	153794159	153798499	+	NM_001204527.2	279	153796455	CDS	CCAGA	16	0.866667	0.999947	NO	NO	hsa-miR-342-5p hsa-miR-149-5p hsa-miR-326 hsa-miR-149-5p
CHTOP	NC_000001.11	153634066	153646306	+	NM_001206612.2	1070	153645294	3' UTR	AGACT	42	0.707317	0.999947	YES	YES	NO
CHTOP	NC_000001.11	153634066	153646306	+	NM_001206612.2	1144	153645368	3' UTR	GGACC	30	0.466667	0.999987	YES	YES	NO
CHTOP	NC_000001.11	153634066	153646306	+	NM_001206612.2	1165	153645389	3' UTR	GGACT	21	0.75	0.999971	YES	YES	hsa-miR-34a-5p hsa-miR-139-5p hsa-miR-139-5p hsa-miR-26a-5p hsa-miR-34a-5p hsa-miR-34a-5p hsa-miR-26a-5p hsa-miR-26b-5p hsa-miR-34a-5p hsa-miR-34a-5p hsa-miR-34a-5p
CHTOP	NC_000001.11	153634066	153646306	+	NM_001206612.2	479	153638413	CDS	ATAGA	29	0.772727	0.999903	NO	NO	NO
SLC16A3	NC_000017.11	82228435	82240086	+	NM_001206950.2	1439	82238880	CDS	GCAGA	20	0.941176	0.999988	NO	NO	NO
SLC16A3	NC_000017.11	82228435	82240086	+	NM_001206950.2	1441	82238882	CDS	AGACT	20	0.736842	0.999965	YES	YES	NO
SLC16A3	NC_000017.11	82228435	82240086	+	NM_001206950.2	1453	82238894	CDS	GGACT	20	0.736842	0.999991	YES	YES	NO
SLC16A3	NC_000017.11	82228435	82240086	+	NM_001206950.2	1612	82239053	3' UTR	GGACT	17	0.875	0.999998	YES	YES	hsa-miR-27a-5p hsa-miR-671-3p
SLC16A3	NC_000017.11	82234899	82240086	+	NM_001206951.2	1444	82238894	CDS	GGACT	9	0.875	0.999925	YES	YES	NO
SLC16A3	NC_000017.11	82234899	82240086	+	NM_001206951.2	1603	82239053	3' UTR	GGACT	10	1	0.999943	YES	YES	hsa-miR-27a-5p hsa-miR-671-3p
SLC16A3	NC_000017.11	82235774	82240086	+	NM_001206952.2	1411	82238894	CDS	GGACT	12	0.75	0.999986	YES	YES	NO
RNF40	NC_000016.10	30761612	30776307	+	NM_001207034.1	4202	30774790	3' UTR	TAATC	14	0.916667	0.999933	NO	NO	hsa-miR-423-5p hsa-miR-423-5p hsa-miR-423-5p hsa-miR-423-5p
CALU	NC_000007.14	128739359	128773400	+	NM_001219.5	1114	128769248	3' UTR	TGAGA	11	1	0.999994	NO	NO	hsa-miR-194-5p hsa-miR-132-3p hsa-miR-194-5p hsa-miR-212-3p hsa-miR-222-5p hsa-miR-132-3p hsa-miR-139-5p hsa-miR-194-5p hsa-miR-34a-5p hsa-miR-132-3p hsa-miR-194-5p hsa-miR-212-3p hsa-miR-139-5p hsa-miR-222-5p hsa-miR-194-5p hsa-miR-194-5p hsa-miR-132-3p hsa-miR-194-5p hsa-miR-212-3p hsa-miR-34a-5p hsa-miR-194-5p hsa-miR-194-5p
CASP9	NC_000001.11	15491401	15524215	-	NM_001229.5	1344	15492865	3' UTR	GGACT	16	0.75	0.999993	YES	YES	NO
SERPINH1	NC_000011.10	75562253	75572783	+	NM_001235.5	1406	75572131	3' UTR	TGAGA	107	0.790698	0.999943	NO	NO	hsa-miR-10a-5p hsa-miR-10a-5p hsa-miR-10a-5p hsa-miR-29c-3p hsa-miR-29b-3p hsa-miR-29a-3p
SERPINH1	NC_000011.10	75562253	75572783	+	NM_001235.5	1408	75572133	3' UTR	AGACA	104	0.540816	0.999959	YES	YES	hsa-miR-10a-5p hsa-miR-10a-5p hsa-miR-10a-5p hsa-miR-29c-3p hsa-miR-29b-3p hsa-miR-29a-3p
SERPINH1	NC_000011.10	75562253	75572783	+	NM_001235.5	1543	75572268	3' UTR	GGACA	102	0.242424	0.999968	YES	YES	hsa-miR-27b-3p hsa-miR-29c-3p hsa-miR-29b-3p hsa-miR-29a-3p
SERPINH1	NC_000011.10	75562253	75572783	+	NM_001235.5	1626	75572351	3' UTR	TGAAA	58	0.914894	0.999988	NO	NO	hsa-miR-29c-3p hsa-miR-29b-3p hsa-miR-29a-3p
SERPINH1	NC_000011.10	75562253	75572783	+	NM_001235.5	283	75566531	CDS	GGACC	85	0.333333	0.999952	YES	YES	NO
SERPINH1	NC_000011.10	75562253	75572783	+	NM_001235.5	509	75566757	CDS	GGACC	72	0.126761	0.999993	YES	YES	NO
CCNE1	NC_000019.10	29811991	29824312	+	NM_001238.4	1699	29824057	3' UTR	GGACT	8	1	0.99993	YES	YES	hsa-miR-424-5p hsa-miR-503-5p
ANAPC16	NC_000010.11	72216012	72235860	+	NM_001242546.2	866	72233169	3' UTR	GGACT	15	0.714286	0.999992	YES	YES	hsa-miR-4521 hsa-miR-155-5p
FNDC10	NC_000001.11	1598012	1600135	-	NM_001242659.2	1455	1598681	3' UTR	GGACC	25	0.541667	0.999905	YES	YES	NO
FNDC10	NC_000001.11	1598012	1600135	-	NM_001242659.2	1699	1598437	3' UTR	GGACC	42	0.55	0.99993	YES	YES	NO
FNDC10	NC_000001.11	1598012	1600135	-	NM_001242659.2	1883	1598253	3' UTR	GGACA	43	0.209302	0.999924	YES	YES	NO
FNDC10	NC_000001.11	1598012	1600135	-	NM_001242659.2	1943	1598193	3' UTR	GGACT	40	1	0.999999	YES	YES	NO
FNDC10	NC_000001.11	1598012	1600135	-	NM_001242659.2	983	1599153	3' UTR	AGACT	27	0.909091	0.999989	YES	YES	NO
FNDC10	NC_000001.11	1598012	1600135	-	NM_001242659.2	991	1599145	3' UTR	AGACT	24	0.809524	0.999984	YES	YES	NO
AHCYL1	NC_000001.11	110000927	110023742	+	NM_001242674.2	3020	110023077	3' UTR	TAATT	18	1	0.999917	NO	NO	NO
RPL13	NC_000016.10	89560657	89566829	+	NM_001243131.1	831	89563302	3' UTR	GGACT	33	0.533333	0.999948	YES	YES	NO
IQSEC2	NC_000023.11	53266328	53281584	-	NM_001243197.2	479	53266771	3' UTR	GGACT	19	0.529412	0.999976	YES	YES	hsa-miR-378c hsa-miR-378a-3p
TTC39C	NC_000018.10	24014754	24020288	+	NM_001243425.2	425	24019999	3' UTR	GGACT	60	0.727273	0.999965	YES	YES	NO
PRXL2A	NC_000010.11	80408551	80437115	+	NM_001243781.2	951	80432282	3' UTR	AGACT	17	0.75	0.999987	YES	YES	NO
APEX1	NC_000014.9	20455226	20457767	+	NM_001244249.2	1034	20457353	CDS	GGACT	27	0.923077	0.999994	YES	YES	hsa-miR-142-5p hsa-miR-142-5p
LSM4	NC_000019.10	18306236	18323076	-	NM_001252129.2	825	18307073	3' UTR	GGACT	166	0.727273	0.999984	YES	YES	NO
CD70	NC_000019.10	6585839	6591150	-	NM_001252.5	668	6586082	CDS	GGACA	109	0.944444	0.999997	YES	YES	hsa-miR-320a-3p hsa-miR-20a-5p hsa-miR-106a-5p hsa-miR-106b-5p hsa-miR-106b-5p hsa-miR-17-5p hsa-miR-17-5p hsa-miR-20a-5p hsa-miR-320a-3p hsa-miR-93-5p
PCMT1	NC_000006.12	149749695	149811421	+	NM_001252049.1	991	149810725	3' UTR	GGACT	22	0.52381	0.999935	YES	YES	hsa-miR-17-5p hsa-miR-195-5p
RDH11	NC_000014.9	67676800	67695764	-	NM_001252650.2	1756	67677373	3' UTR	AAAAA	19	0.9375	0.99991	NO	NO	NO
RDH11	NC_000014.9	67676800	67695764	-	NM_001252650.2	1758	67677371	3' UTR	AAAAA	18	0.941176	0.999971	NO	NO	NO
RDH11	NC_000014.9	67676800	67695764	-	NM_001252650.2	1760	67677369	3' UTR	AAAAA	18	0.833333	0.999911	NO	NO	NO
ARAF	NC_000023.11	47561205	47571908	+	NM_001256196.2	2121	47571642	3' UTR	AGACT	17	0.823529	0.999941	YES	YES	hsa-miR-34a-5p
ARAF	NC_000023.11	47561205	47571908	+	NM_001256196.2	2276	47571797	3' UTR	GGATT	16	0.538462	0.999938	NO	NO	hsa-miR-34a-5p
ARAF	NC_000023.11	47561205	47571908	+	NM_001256196.2	2345	47571866	3' UTR	GGACT	11	0.818182	0.999922	YES	YES	hsa-miR-151a-5p hsa-miR-151b hsa-miR-877-5p hsa-miR-1910-5p hsa-miR-151a-5p hsa-miR-877-5p hsa-miR-877-5p hsa-miR-34a-5p
UBE2L3	NC_000022.11	21567714	21624034	+	NM_001256356.2	396	21621665	CDS	GGACT	10	0.857143	0.99992	YES	YES	NO
LRRC42	NC_000001.11	53946350	53968168	+	NM_001256409.2	1516	53967920	CDS	GGACT	16	0.875	0.999981	YES	YES	NO
EFTUD2	NC_000017.11	44849948	44899368	-	NM_001258353.2	3326	44851265	3' UTR	GGACT	15	0.769231	0.99997	YES	YES	NO
EFTUD2	NC_000017.11	44849948	44899445	-	NM_001258354.2	2979	44851265	3' UTR	GGACT	11	0.909091	0.999952	YES	YES	NO
TARS1	NC_000005.10	33440696	33468091	+	NM_001258437.1	1072	33457354	CDS	GGAGA	45	0.891892	0.999939	NO	NO	hsa-miR-182-5p hsa-miR-130b-5p
DCTN2	NC_000012.12	57530051	57547192	-	NM_001261413.2	1321	57530703	CDS	AGAAG	43	0.378378	0.999922	NO	NO	hsa-miR-21-5p hsa-miR-1180-3p
CDK9	NC_000009.12	127786034	127790792	+	NM_001261.4	1381	127789690	3' UTR	GGACT	17	1	0.999998	YES	YES	hsa-miR-24-3p
CDK9	NC_000009.12	127786034	127790792	+	NM_001261.4	1406	127789715	3' UTR	AGACC	22	0.318182	0.999938	YES	YES	NO
OS9	NC_000012.12	57694132	57721557	+	NM_001261422.2	1760	57720956	3' UTR	GGACT	9	0.75	0.999936	YES	NO	hsa-miR-361-3p
CDK9	NC_000009.12	127786034	127790792	+	NM_001261.4	984	127789293	CDS	GGACC	22	0.272727	0.999935	YES	YES	hsa-let-7d-5p hsa-miR-34a-5p hsa-let-7d-5p hsa-miR-652-3p hsa-miR-34a-5p hsa-let-7d-5p hsa-let-7d-5p
CDKN2C	NC_000001.11	50968706	50974634	+	NM_001262.3	1456	50974014	CDS	GGACA	39	0.783784	0.999997	YES	YES	hsa-miR-106a-5p hsa-miR-106b-5p hsa-miR-17-5p hsa-miR-18a-5p hsa-miR-106b-5p
CDKN2C	NC_000001.11	50968706	50974634	+	NM_001262.3	1467	50974025	CDS	AGACT	46	0.911111	0.999997	YES	YES	hsa-miR-106b-5p hsa-miR-17-5p hsa-miR-20a-5p hsa-miR-93-5p
CDKN2C	NC_000001.11	50968706	50974634	+	NM_001262.3	2054	50974612	3' UTR	TAATT	45	0.954545	0.999992	NO	NO	NO
CDKN2C	NC_000001.11	50968706	50974634	+	NM_001262.3	750	50969455	5'UTR	GGACC	31	0.322581	0.999912	YES	YES	NO
MORF4L1	NC_000015.10	78872890	78898139	+	NM_001265605.2	712	78892296	CDS	TAATT	29	1	0.99994	NO	NO	NO
PDCD6	NC_000005.10	271646	314974	+	NM_001267556.2	771	314641	3' UTR	GGACC	107	0.0660377	0.99994	YES	YES	hsa-miR-194-5p hsa-miR-194-5p hsa-miR-1301-3p hsa-miR-194-5p hsa-miR-194-5p hsa-miR-194-5p hsa-miR-194-5p hsa-miR-582-5p hsa-miR-582-5p
EIF3C	NC_000016.10	28711417	28735730	+	NM_001267574.2	3001	28735502	CDS	AGACG	24	0.909091	0.999952	NO	NO	NO
SRP72	NC_000004.12	56467617	56503681	+	NM_001267722.2	2659	56502668	3' UTR	GGACT	11	0.636364	0.999979	YES	YES	NO
RAD23A	NC_000019.10	12945862	12953642	+	NM_001270362.2	1189	12953062	3' UTR	CCAGG	53	1	0.99995	NO	NO	NO
IST1	NC_000016.10	71895531	71931199	+	NM_001270975.2	1216	71927854	3' UTR	AGACT	26	1	0.999981	YES	YES	NO
IST1	NC_000016.10	71895531	71931199	+	NM_001270975.2	1356	71927994	3' UTR	TGAGA	27	0.875	0.999942	NO	NO	NO
IST1	NC_000016.10	71895531	71931199	+	NM_001270975.2	1358	71927996	3' UTR	AGACT	26	0.782609	0.999996	YES	YES	NO
IST1	NC_000016.10	71895531	71931199	+	NM_001270975.2	1370	71928008	3' UTR	GGAGA	25	1	0.99999	NO	NO	hsa-miR-30e-3p
IST1	NC_000016.10	71895531	71931199	+	NM_001270975.2	1372	71928010	3' UTR	AGACT	21	0.952381	0.999977	YES	YES	hsa-miR-30e-3p
IST1	NC_000016.10	71895531	71931199	+	NM_001270975.2	2162	71928800	3' UTR	GGACT	24	0.625	0.999989	YES	YES	NO
IST1	NC_000016.10	71894408	71930639	+	NM_001270976.1	1369	71927854	3' UTR	AGACT	12	1	0.999987	YES	YES	NO
IST1	NC_000016.10	71894408	71930639	+	NM_001270976.1	1509	71927994	3' UTR	TGAGA	11	0.888889	0.999952	NO	NO	NO
IST1	NC_000016.10	71894408	71930639	+	NM_001270976.1	1511	71927996	3' UTR	AGACT	10	0.666667	0.999968	YES	YES	NO
PUF60	NC_000008.11	143816344	143829315	-	NM_001271096.2	1529	143816629	CDS	TGAGA	13	1	0.999936	NO	NO	hsa-miR-627-5p hsa-miR-193a-5p
PUF60	NC_000008.11	143816344	143829315	-	NM_001271096.2	1531	143816627	CDS	AGACT	13	1	0.999973	YES	YES	hsa-miR-627-5p hsa-miR-193a-5p
PUF60	NC_000008.11	143816344	143829315	-	NM_001271097.2	1447	143816627	CDS	AGACT	10	0.9	0.999951	YES	YES	hsa-miR-627-5p hsa-miR-193a-5p
BASP1	NC_000005.10	17216823	17276834	+	NM_001271606.2	535	17275667	CDS	AGACT	189	0.939227	0.999956	YES	YES	hsa-miR-942-5p
CHD2	NC_000015.10	92900324	93027996	+	NM_001271.4	9171	93027817	3' UTR	GGACT	11	0.636364	0.999974	YES	YES	hsa-miR-106a-5p hsa-miR-106a-5p
SMIM10L1	NC_000012.12	11171194	11176016	+	NM_001271592.2	746	11171939	3' UTR	GGACT	32	0.935484	0.999978	YES	NO	NO
MTCH1	NC_000006.12	36968141	36986196	-	NM_001271641.2	1092	36970068	CDS	GGATT	55	0.714286	0.999918	NO	NO	hsa-miR-34a-5p hsa-miR-34a-5p hsa-miR-34a-5p hsa-miR-34a-5p hsa-miR-26a-5p hsa-miR-34a-5p hsa-miR-34a-5p
ABCB7	NC_000023.11	75051048	75156283	-	NM_001271696.3	2076	75053564	CDS	GTACC	14	0.75	0.999968	NO	NO	NO
SERPINB6	NC_000006.12	2948159	2971567	-	NM_001271822.2	1363	2948527	CDS	AGACT	27	0.375	0.99997	YES	YES	hsa-miR-346
UQCC4	NC_000016.10	1419752	1420747	-	NM_001272051.2	237	1420432	CDS	GGACA	21	0.631579	0.999946	YES	YES	NO
UQCC4	NC_000016.10	1419752	1420747	-	NM_001272051.2	329	1420340	CDS	GGACC	25	0.56	0.999997	YES	YES	NO
UQCC4	NC_000016.10	1419752	1420747	-	NM_001272051.2	534	1420135	3' UTR	GGACT	22	0.75	0.99997	YES	YES	hsa-miR-148b-5p
MRFAP1	NC_000004.12	6640685	6642729	+	NM_001272053.2	1220	6642494	3' UTR	GGACT	94	0.681818	0.999971	YES	YES	hsa-miR-148b-5p
MRFAP1	NC_000004.12	6640685	6642729	+	NM_001272053.2	1295	6642569	3' UTR	GGACC	97	0.138298	0.99992	YES	YES	NO
MRFAP1	NC_000004.12	6640685	6642729	+	NM_001272053.2	241	6641044	CDS	GGACA	43	0.880952	0.999906	YES	YES	hsa-miR-340-3p hsa-miR-6766-3p hsa-miR-324-3p hsa-miR-340-3p
MRFAP1	NC_000004.12	6640685	6642729	+	NM_001272053.2	961	6642235	3' UTR	GGACT	98	0.375	0.999945	YES	YES	hsa-miR-27a-3p hsa-miR-27a-3p hsa-miR-27a-3p hsa-miR-27b-3p hsa-miR-92b-3p hsa-miR-148b-5p hsa-miR-423-3p
LONP1	NC_000019.10	5691834	5720452	-	NM_001276480.1	2699	5692018	3' UTR	GGACT	37	0.485714	0.99999	YES	YES	NO
LONP1	NC_000019.10	5691834	5720452	-	NM_001276480.1	2764	5691953	3' UTR	GGACC	35	0.171429	0.999948	YES	YES	NO
TRABD2A	NC_000002.12	84821666	84881084	-	NM_001277053.2	1507	84821973	CDS	GGACT	22	0.47619	0.999988	YES	YES	NO
TRABD2A	NC_000002.12	84821666	84881084	-	NM_001277053.2	1668	84821812	3' UTR	AGACT	20	0.789474	0.999969	YES	YES	NO
COL5A1	NC_000009.12	134641805	134844843	+	NM_001278074.1	7888	134844291	3' UTR	TGACT	10	0.8	0.999954	YES	YES	NO
COL5A1	NC_000009.12	134641805	134844843	+	NM_001278074.1	7930	134844333	3' UTR	GGACT	13	0.909091	0.999947	YES	YES	NO
POLE3	NC_000009.12	113407235	113410749	-	NM_001278255.1	796	113408677	3' UTR	TGACT	17	0.785714	0.999909	YES	YES	NO
CARHSP1	NC_000016.10	8852942	8868361	-	NM_001278263.1	524	8855126	3' UTR	GGAGA	22	0.789474	0.999921	NO	NO	hsa-miR-106b-5p hsa-miR-155-5p
TUBA4A	NC_000002.12	219249710	219254740	-	NM_001278552.2	1395	219250947	CDS	GGACC	29	0.689655	0.999985	YES	YES	hsa-miR-23a-3p hsa-miR-23b-3p
TUBA4A	NC_000002.12	219249710	219254740	-	NM_001278552.2	1677	219250665	CDS	GGACT	33	0.96875	0.999967	YES	YES	NO
MYBL2	NC_000020.11	43667114	43716482	+	NM_001278610.2	1839	43713023	CDS	AGAAA	29	0.96	0.99995	NO	NO	hsa-miR-378a-3p
RANBP1	NC_000022.11	20117505	20127355	+	NM_001278640.2	1033	20127337	3' UTR	AAAAC	21	0.9	0.999979	NO	NO	hsa-miR-17-5p
SLC35B1	NC_000017.11	49700943	49707964	-	NM_001278784.2	1103	49701430	3' UTR	AGAAT	16	0.6875	0.999945	NO	NO	hsa-miR-21-5p
SLC35B1	NC_000017.11	49700943	49707964	-	NM_001278784.2	1150	49701383	3' UTR	GGACT	12	0.545455	0.999976	YES	YES	NO
MBD3	NC_000019.10	1573596	1592865	-	NM_001281453.2	1928	1577346	3' UTR	GGACA	11	0.7	0.999932	YES	YES	NO
MBD3	NC_000019.10	1573596	1592865	-	NM_001281453.2	2072	1577202	3' UTR	GGACT	11	0.818182	0.999931	YES	YES	NO
ETF1	NC_000005.10	138506095	138541711	-	NM_001282185.2	1659	138508067	3' UTR	GGACT	7	1	0.999964	YES	YES	NO
SIGMAR1	NC_000009.12	34634722	34637787	-	NM_001282206.2	1492	34634855	3' UTR	GGAGA	19	0.785714	0.999952	NO	NO	NO
PYCR1	NC_000017.11	81932391	81937300	-	NM_001282280.2	1576	81932684	3' UTR	GGACA	18	0.823529	0.999995	YES	YES	NO
PES1	NC_000022.11	30576625	30607013	-	NM_001282328.1	2723	30576642	3' UTR	GGACT	11	0.636364	0.999979	YES	YES	NO
PTTG1	NC_000005.10	160421910	160428744	+	NM_001282383.1	136	160422045	5'UTR	GGACT	11	0.5	0.999904	YES	YES	NO
CSNK2B	NC_000006.12	31666080	31670067	+	NM_001282385.2	508	31669328	CDS	TGACA	23	0.608696	0.999974	YES	YES	NO
LMNA	NC_000001.11	156114711	156140081	+	NM_001282626.2	1545	156136393	CDS	GGATG	11	1	0.999953	NO	NO	hsa-miR-197-3p hsa-miR-500a-3p
PDIA6	NC_000002.12	10783391	10837712	-	NM_001282705.2	1644	10784188	3' UTR	GGACA	29	0.642857	0.999975	YES	YES	hsa-miR-33a-3p hsa-miR-33a-3p hsa-miR-33a-3p hsa-miR-135b-3p hsa-miR-135b-3p
PMPCA	NC_000009.12	136410658	136423761	+	NM_001282944.2	1563	136423333	3' UTR	GGACA	13	0.923077	0.999996	YES	YES	NO
RTF2	NC_000020.11	56468627	56519449	+	NM_001283035.2	1384	56518567	3' UTR	AGAGA	21	0.588235	0.999957	NO	NO	NO
RTF2	NC_000020.11	56468627	56519449	+	NM_001283035.2	1386	56518569	3' UTR	AGACT	21	0.55	0.99998	YES	NO	NO
SLC9A3	NC_000005.10	470456	524449	-	NM_001284351.3	4270	471714	3' UTR	GGATT	11	0.555556	0.999955	NO	NO	NO
CEBPB	NC_000020.11	50190583	50192690	+	NM_001285878.1	1528	50192110	3' UTR	TGAGA	41	0.833333	0.999959	NO	NO	NO
CEBPB	NC_000020.11	50190583	50192690	+	NM_001285878.1	1530	50192112	3' UTR	AGACT	41	0.736842	0.999965	YES	YES	NO
CEBPB	NC_000020.11	50190583	50192690	+	NM_001285878.1	1858	50192440	3' UTR	GGACT	32	0.96875	0.99998	YES	YES	hsa-miR-10b-5p hsa-miR-148b-5p
CEBPB	NC_000020.11	50190583	50192690	+	NM_001285878.1	999	50191581	CDS	GGACT	21	0.75	0.999995	YES	YES	hsa-miR-4664-3p
CEBPB	NC_000020.11	50190583	50192690	+	NM_001285879.1	1528	50192110	3' UTR	TGAGA	36	0.766667	0.999984	NO	NO	NO
CEBPB	NC_000020.11	50190583	50192690	+	NM_001285879.1	1530	50192112	3' UTR	AGACT	37	0.588235	0.999942	YES	YES	NO
CEBPB	NC_000020.11	50190583	50192690	+	NM_001285879.1	999	50191581	5'UTR	GGACT	23	0.954545	0.999989	YES	YES	hsa-miR-4664-3p
RIC8A	NC_000011.10	207708	215113	+	NM_001286134.2	2774	214381	3' UTR	GGACT	21	0.684211	0.999917	YES	YES	hsa-miR-29a-3p hsa-miR-103a-3p hsa-miR-424-5p hsa-miR-15a-5p hsa-miR-16-5p hsa-miR-107 hsa-miR-15b-5p hsa-miR-16-5p hsa-miR-15b-5p hsa-miR-29a-3p hsa-miR-15a-5p hsa-miR-107 hsa-miR-103a-3p hsa-miR-103a-3p hsa-miR-107 hsa-miR-15a-5p hsa-miR-15b-5p hsa-miR-16-5p hsa-miR-29a-3p hsa-miR-29b-3p hsa-miR-29c-3p hsa-miR-424-5p hsa-miR-15a-5p
RIC8A	NC_000011.10	207708	215113	+	NM_001286134.2	2793	214400	3' UTR	AGACT	23	0.736842	0.999991	YES	YES	hsa-miR-191-5p
RIC8A	NC_000011.10	207708	215113	+	NM_001286134.2	2930	214537	3' UTR	GGACT	24	0.875	0.99994	YES	YES	hsa-miR-455-3p
NQO1	NC_000016.10	69709401	69726560	-	NM_001286137.2	408	69718139	CDS	AGACC	10	0.7	0.999913	YES	NO	hsa-miR-125b-2-3p hsa-miR-125b-2-3p
GOT2	NC_000016.10	58707131	58734316	-	NM_001286220.2	1520	58707903	3' UTR	CAAGA	19	0.823529	0.999961	NO	NO	NO
GOT2	NC_000016.10	58707131	58734316	-	NM_001286220.2	1522	58707901	3' UTR	AGAAA	19	0.777778	0.99994	NO	NO	NO
GOT2	NC_000016.10	58707131	58734316	-	NM_001286220.2	2079	58707344	3' UTR	GGACC	30	0.310345	0.999974	YES	YES	NO
TPT1	NC_000013.11	45333471	45341183	-	NM_001286273.2	1059	45336886	3' UTR	AGAGA	37	0.909091	0.999983	NO	NO	NO
TPT1	NC_000013.11	45333471	45341183	-	NM_001286273.2	1061	45336884	3' UTR	AGACT	36	0.75	0.999988	YES	YES	NO
TPT1	NC_000013.11	45333471	45341183	-	NM_001286273.2	899	45337046	3' UTR	GGACT	40	0.911765	0.999943	YES	YES	NO
HDDC3	NC_000015.10	90929968	90932549	-	NM_001286451.2	674	90931150	3' UTR	AAAGA	26	0.884615	0.999974	NO	NO	NO
HDDC3	NC_000015.10	90929968	90932549	-	NM_001286451.2	676	90931148	3' UTR	AGACT	24	0.863636	0.999983	YES	YES	NO
HDDC3	NC_000015.10	90929968	90932549	-	NM_001286451.2	836	90930988	3' UTR	GGACT	20	0.555556	0.999993	YES	YES	NO
EIF3C	NC_000016.10	28711417	28735730	+	NM_001286478.1	2833	28735502	CDS	AGACG	12	1	0.999984	NO	NO	NO
HSPH1	NC_000013.11	31134974	31162388	-	NM_001286504.1	2867	31137328	CDS	GGACT	10	0.9	0.999957	YES	YES	hsa-miR-26b-5p hsa-miR-26a-5p hsa-miR-26b-5p
HSPH1	NC_000013.11	31134974	31162388	-	NM_001286504.1	2873	31137322	CDS	GGACT	9	0.875	0.999964	YES	YES	hsa-miR-26b-5p hsa-miR-26a-5p hsa-miR-26b-5p
RNPS1	NC_000016.10	2253116	2267337	-	NM_001286625.1	1198	2253964	CDS	TAAAC	11	1	0.999904	NO	NO	hsa-miR-152-3p hsa-miR-26b-3p
RNPS1	NC_000016.10	2253120	2268126	-	NM_001286626.2	111	2264293	CDS	TGAGA	19	1	0.999989	NO	NO	hsa-miR-330-5p
RNPS1	NC_000016.10	2253120	2268126	-	NM_001286626.2	113	2264291	CDS	AGAAG	17	1	0.999972	NO	NO	NO
RNPS1	NC_000016.10	2253120	2268126	-	NM_001286626.2	919	2253964	CDS	TAAAC	16	1	0.999945	NO	NO	hsa-miR-152-3p hsa-miR-26b-3p
RNPS1	NC_000016.10	2253120	2268126	-	NM_001286626.2	920	2253963	3' UTR	AAACA	15	1	0.999921	YES	YES	hsa-miR-152-3p hsa-miR-26b-3p
PTTG1IP	NC_000021.9	44849598	44873690	-	NM_001286822.2	1959	44849911	3' UTR	GGACT	10	0.666667	0.999963	YES	YES	hsa-miR-17-5p hsa-miR-20a-5p hsa-miR-20b-5p hsa-miR-93-5p hsa-miR-101-3p
JUND	NC_000019.10	18279694	18281622	-	NM_001286968.2	1258	18280365	3' UTR	GGACT	68	0.830508	0.999959	YES	YES	NO
JUND	NC_000019.10	18279694	18281622	-	NM_001286968.2	1362	18280261	3' UTR	GGACT	59	0.773585	0.999972	YES	YES	hsa-miR-21-5p
JUND	NC_000019.10	18279694	18281622	-	NM_001286968.2	575	18281048	CDS	GGATT	36	0.538462	0.999908	NO	NO	hsa-miR-19a-3p hsa-miR-19b-3p hsa-miR-19a-3p hsa-miR-19b-3p hsa-miR-19b-3p hsa-miR-19a-3p hsa-miR-19b-3p hsa-miR-19a-3p
JUND	NC_000019.10	18279694	18281622	-	NM_001286968.2	929	18280694	CDS	GGACA	42	0.820513	0.999987	YES	YES	NO
STOML2	NC_000009.12	35099776	35103195	-	NM_001287032.1	664	35101185	CDS	CCAGA	24	0.666667	0.999903	NO	NO	NO
MFSD12	NC_000019.10	3544199	3557586	-	NM_001287529.2	1776	3544533	3' UTR	GGACT	91	0.282353	0.999955	YES	YES	NO
CLIC1	NC_000006.12	31730581	31737318	-	NM_001287593.1	1312	31730829	3' UTR	GGACT	39	0.351351	0.999945	YES	NO	hsa-let-7b-5p hsa-let-7c-5p hsa-let-7b-5p hsa-let-7b-5p
CLIC1	NC_000006.12	31730581	31737318	-	NM_001287593.1	1377	31730764	3' UTR	GGACA	39	0.552632	0.99999	YES	YES	NO
CLIC1	NC_000006.12	31730581	31736530	-	NM_001287594.3	902	31730764	3' UTR	GGACA	47	0.702128	0.999964	YES	YES	NO
FDFT1	NC_000008.11	11795582	11839298	+	NM_001287743.2	1887	11838738	3' UTR	GGACC	27	0.222222	0.999964	YES	YES	NO
CLIC1	NC_000006.12	31730599	31736530	-	NM_001288.6	1034	31730764	3' UTR	GGACA	154	0.731544	0.999996	YES	YES	NO
CLTC	NC_000017.11	59619895	59696956	+	NM_001288653.2	4375	59683471	CDS	TAATT	19	1	0.999933	NO	NO	NO
CLTC	NC_000017.11	59619895	59696956	+	NM_001288653.2	5397	59693972	3' UTR	GGACT	23	0.652174	0.999989	YES	YES	hsa-miR-205-5p
BABAM1	NC_000019.10	17267443	17279337	+	NM_001288757.2	982	17279129	3' UTR	GGACC	12	0.666667	0.999949	YES	YES	NO
TAP2	NC_000006.12	32825415	32838739	-	NM_001290043.2	2332	32828726	3' UTR	GGACA	11	0.818182	0.999954	YES	NO	NO
POLDIP2	NC_000017.11	28346633	28357527	-	NM_001290145.2	1655	28347594	3' UTR	GGACT	25	0.52	0.999979	YES	YES	hsa-miR-17-5p hsa-miR-20a-5p
POLDIP2	NC_000017.11	28346633	28357527	-	NM_001290145.2	1660	28347589	3' UTR	GGACT	28	0.888889	0.999979	YES	YES	hsa-miR-17-5p hsa-miR-20a-5p
ADIPOR1	NC_000001.11	202940825	202958396	-	NM_001290557.1	1824	202941250	3' UTR	GGACT	15	0.571429	0.999994	YES	YES	NO
EIF4G1	NC_000003.12	184314606	184335353	+	NM_001291157.2	5084	184334972	3' UTR	GGACT	16	0.6	0.99991	YES	YES	hsa-miR-139-5p hsa-miR-455-3p hsa-miR-139-5p hsa-miR-455-3p
PCK2	NC_000014.9	24094311	24104125	+	NM_001291556.2	1980	24104092	3' UTR	AGACT	9	0.75	0.999968	YES	YES	hsa-miR-330-5p hsa-miR-92a-3p
CD24	NC_000006.12	106969831	106975627	-	NM_001291737.1	916	106971355	3' UTR	GGACA	8	1	0.999932	YES	YES	NO
CD24	NC_000006.12	106969831	106975627	-	NM_001291737.1	961	106971310	3' UTR	GGATT	9	0.571429	0.999909	NO	NO	NO
DAP	NC_000005.10	10679230	10761234	-	NM_001291963.2	1262	10680226	3' UTR	GGACA	33	0.545455	0.999983	YES	YES	NO
ETF1	NC_000005.10	138506095	138541711	-	NM_001291974.2	1783	138508067	3' UTR	GGACT	7	1	0.999918	YES	YES	NO
PRSS23	NC_000011.10	86800542	86811233	+	NM_001293179.2	1019	86808544	CDS	AGACC	35	0.242424	0.999912	YES	YES	NO
PRSS23	NC_000011.10	86800542	86811233	+	NM_001293179.2	1158	86808683	CDS	GGACA	48	0.468085	0.999995	YES	YES	NO
PRSS23	NC_000011.10	86800542	86811233	+	NM_001293179.2	1254	86808779	CDS	GGATT	57	0.818182	0.999931	NO	NO	NO
PRSS23	NC_000011.10	86800542	86811233	+	NM_001293179.2	413	86807938	CDS	AGACG	21	0.666667	0.999963	NO	YES	NO
PRSS23	NC_000011.10	86800542	86811233	+	NM_001293179.2	466	86807991	CDS	CGAGA	28	0.875	0.999988	NO	NO	hsa-miR-30e-3p
PRSS23	NC_000011.10	86800542	86811233	+	NM_001293179.2	468	86807993	CDS	AGACT	27	0.52381	0.999957	YES	YES	hsa-miR-30e-3p
PRSS23	NC_000011.10	86800542	86811233	+	NM_001293179.2	849	86808374	CDS	GGATT	33	0.666667	0.999992	NO	NO	hsa-miR-126-3p hsa-miR-374b-5p
PRSS23	NC_000011.10	86791071	86811233	+	NM_001293180.2	1178	86808683	CDS	GGACA	45	0.444444	0.999992	YES	YES	NO
PRSS23	NC_000011.10	86791071	86811233	+	NM_001293180.2	1274	86808779	CDS	GGATT	50	0.714286	0.999963	NO	NO	NO
PRSS23	NC_000011.10	86791071	86811233	+	NM_001293180.2	433	86807938	CDS	AGACG	20	0.526316	0.999965	NO	YES	NO
PRSS23	NC_000011.10	86791071	86811233	+	NM_001293180.2	486	86807991	CDS	CGAGA	25	0.888889	0.999972	NO	NO	hsa-miR-30e-3p
PRSS23	NC_000011.10	86791071	86811233	+	NM_001293180.2	566	86808071	CDS	GGACT	18	0.823529	0.999982	YES	YES	NO
PRSS23	NC_000011.10	86791071	86811233	+	NM_001293180.2	869	86808374	CDS	GGATT	35	0.633333	0.999969	NO	NO	hsa-miR-126-3p hsa-miR-374b-5p
STUB1	NC_000016.10	680410	682801	+	NM_001293197.2	1236	682608	3' UTR	GGACT	17	0.866667	0.999996	YES	YES	NO
STUB1	NC_000016.10	680410	682801	+	NM_001293197.2	1243	682615	3' UTR	GGACT	19	0.705882	0.999971	YES	YES	hsa-miR-132-3p hsa-miR-212-3p hsa-miR-132-3p
TUBB	NC_000006.12	30720352	30725422	+	NM_001293214.2	1234	30724273	CDS	GGACG	90	0.4	0.999905	NO	NO	hsa-miR-340-3p hsa-miR-181b-5p hsa-miR-181d-5p hsa-miR-141-5p
TUBB	NC_000006.12	30721638	30725422	+	NM_001293215.2	1415	30724273	CDS	GGACG	92	0.488889	0.999959	NO	NO	hsa-miR-340-3p hsa-miR-181b-5p hsa-miR-181d-5p hsa-miR-141-5p
RAN	NC_000012.12	130872066	130877678	+	NM_001300797.2	869	130876119	3' UTR	GGACC	114	0.223214	0.999914	YES	NO	NO
RAN	NC_000012.12	130872066	130877678	+	NM_001300797.2	925	130876175	3' UTR	AGACT	114	0.513274	0.999957	YES	NO	hsa-miR-424-5p hsa-miR-15a-5p hsa-miR-15b-5p hsa-miR-16-5p hsa-miR-199a-3p hsa-miR-15a-5p hsa-miR-15b-5p hsa-miR-16-5p hsa-miR-17-3p hsa-miR-424-5p hsa-miR-424-5p hsa-miR-424-5p hsa-let-7a-5p hsa-miR-424-5p hsa-miR-15a-5p hsa-miR-15b-5p hsa-miR-16-5p hsa-miR-424-5p hsa-miR-15a-5p hsa-let-7g-5p hsa-miR-424-5p hsa-miR-15b-5p hsa-miR-15a-5p hsa-miR-15b-5p hsa-let-7a-5p hsa-let-7c-5p hsa-miR-15a-5p h…
RAN	NC_000012.12	130872066	130877678	+	NM_001300796.2	861	130876119	3' UTR	GGACC	61	0.192982	0.999942	YES	NO	NO
RAN	NC_000012.12	130872066	130877678	+	NM_001300796.2	917	130876175	3' UTR	AGACT	58	0.472727	0.999984	YES	NO	hsa-miR-424-5p hsa-miR-15a-5p hsa-miR-15b-5p hsa-miR-16-5p hsa-miR-199a-3p hsa-miR-15a-5p hsa-miR-15b-5p hsa-miR-16-5p hsa-miR-17-3p hsa-miR-424-5p hsa-miR-424-5p hsa-miR-424-5p hsa-let-7a-5p hsa-miR-424-5p hsa-miR-15a-5p hsa-miR-15b-5p hsa-miR-16-5p hsa-miR-424-5p hsa-miR-15a-5p hsa-let-7g-5p hsa-miR-424-5p hsa-miR-15b-5p hsa-miR-15a-5p hsa-miR-15b-5p hsa-let-7a-5p hsa-let-7c-5p hsa-miR-15a-5p h…
EIF4B	NC_000012.12	53006456	53042215	+	NM_001300821.3	1371	53037430	CDS	TGAGA	26	0.92	0.999978	NO	NO	NO
MRPS34	NC_000016.10	1771895	1773134	-	NM_001300900.2	641	1772273	CDS	GGATT	27	0.869565	0.999993	NO	NO	hsa-let-7d-5p hsa-let-7d-5p hsa-let-7d-5p
MRPS34	NC_000016.10	1771895	1773134	-	NM_001300900.2	740	1772174	3' UTR	GGACC	44	0.452381	0.999978	YES	YES	NO
SNX3	NC_000006.12	108211222	108261040	-	NM_001300929.2	210	108260831	CDS	AGATC	20	0.642857	0.999952	NO	NO	hsa-miR-516a-5p hsa-miR-23a-3p hsa-miR-23b-3p hsa-miR-516a-5p hsa-miR-23a-3p hsa-miR-23b-3p hsa-miR-23a-3p
CNOT8	NC_000005.10	154858627	154876792	+	NM_001301073.2	1224	154875570	3' UTR	AGACT	8	0.857143	0.999919	YES	YES	NO
CHCHD10	NC_000022.11	23765834	23767972	-	NM_001301339.2	673	23765882	3' UTR	ACAGA	22	0.619048	0.999925	NO	NO	NO
ZNRD2	NC_000011.10	65570477	65571888	+	NM_001303024.2	710	65571736	3' UTR	AGAGA	28	0.925926	0.999987	NO	NO	NO
ZNRD2	NC_000011.10	65570477	65571888	+	NM_001303024.2	712	65571738	3' UTR	AGAAG	26	0.96	0.999986	NO	NO	NO
ZNRD2	NC_000011.10	65570477	65571888	+	NM_001303024.2	713	65571739	3' UTR	GAAGC	26	1	0.99999	NO	NO	NO
MYL12A	NC_000018.10	3247801	3256236	+	NM_001303047.2	882	3256077	3' UTR	GGACT	30	0.407407	0.99995	YES	YES	hsa-miR-148a-5p hsa-miR-148a-5p
MYL12A	NC_000018.10	3252275	3256236	+	NM_001303049.2	741	3256077	3' UTR	GGACT	15	0.6	0.99993	YES	YES	hsa-miR-148a-5p hsa-miR-148a-5p
TTI1	NC_000020.11	37983021	38033456	-	NM_001303457.2	2025	38011886	CDS	AGACT	9	0.777778	0.999924	YES	YES	hsa-miR-30a-5p hsa-miR-30d-5p
TTI1	NC_000020.11	37983021	38033456	-	NM_001303457.2	2181	38011730	CDS	AGACT	10	0.777778	0.999946	YES	YES	hsa-miR-181b-3p hsa-miR-28-3p hsa-miR-181b-3p hsa-miR-28-3p
TUBB6	NC_000018.10	12307669	12326616	+	NM_001303524.1	1637	12326294	3' UTR	AGACT	22	1	0.999993	YES	YES	NO
TUBB6	NC_000018.10	12307669	12326616	+	NM_001303524.1	1693	12326350	3' UTR	AGACT	31	0.482759	0.999943	YES	YES	hsa-miR-145-3p
TUBB6	NC_000018.10	12307669	12326616	+	NM_001303524.1	1708	12326365	3' UTR	GGACT	33	0.814815	0.999963	YES	YES	hsa-miR-26b-5p
TUBB6	NC_000018.10	12307669	12326616	+	NM_001303524.1	1867	12326524	3' UTR	GGACT	26	0.92	0.999997	YES	YES	NO
TUBB6	NC_000018.10	12307669	12326616	+	NM_001303524.1	485	12325142	CDS	GGACG	19	0.5	0.999919	NO	NO	NO
TUBB6	NC_000018.10	12308241	12326616	+	NM_001303526.2	1446	12326294	3' UTR	AGACT	16	0.933333	0.999994	YES	YES	NO
TUBB6	NC_000018.10	12308241	12326616	+	NM_001303526.2	1502	12326350	3' UTR	AGACT	18	0.5	0.999907	YES	YES	hsa-miR-145-3p
TUBB6	NC_000018.10	12308241	12326616	+	NM_001303526.2	1517	12326365	3' UTR	GGACT	19	0.846154	0.999957	YES	YES	hsa-miR-26b-5p
TUBB6	NC_000018.10	12308241	12326616	+	NM_001303526.2	1676	12326524	3' UTR	GGACT	12	0.909091	0.999992	YES	YES	NO
TUBB6	NC_000018.10	12308241	12326616	+	NM_001303527.2	1448	12326294	3' UTR	AGACT	12	0.636364	0.999973	YES	YES	NO
TUBB6	NC_000018.10	12308241	12326569	+	NM_001303529.3	1815	12326294	3' UTR	AGACT	10	0.8	0.99992	YES	YES	NO
TUBB6	NC_000018.10	12308241	12326569	+	NM_001303529.3	2045	12326524	3' UTR	GGACT	13	0.692308	0.99996	YES	YES	NO
TUBB6	NC_000018.10	12308241	12326569	+	NM_001303530.3	2024	12326294	3' UTR	AGACT	13	0.846154	0.999958	YES	YES	NO
TUBB6	NC_000018.10	12308241	12326569	+	NM_001303530.3	2254	12326524	3' UTR	GGACT	14	0.857143	0.999975	YES	YES	NO
PGD	NC_000001.11	10399064	10420511	+	NM_001304451.2	1561	10419870	3' UTR	AGACT	22	0.578947	0.999933	YES	YES	NO
PGD	NC_000001.11	10399064	10420511	+	NM_001304452.2	1830	10419868	3' UTR	AGAGA	38	0.83871	0.999971	NO	NO	NO
PTEN	NC_000010.11	87863625	87971930	+	NM_001304717.5	493	87864118	CDS	GGACC	10	0.6	0.999939	YES	YES	NO
PTEN	NC_000010.11	87863625	87971930	+	NM_001304717.5	915	87864540	CDS	AGACT	11	0.888889	0.999955	YES	NO	hsa-miR-26a-5p hsa-miR-26b-5p hsa-miR-16-5p hsa-miR-29a-3p hsa-miR-29b-3p hsa-miR-16-5p hsa-miR-16-5p hsa-miR-21-5p hsa-miR-21-5p hsa-miR-29a-3p hsa-miR-29b-3p hsa-miR-29b-3p hsa-miR-99b-5p hsa-miR-16-5p hsa-miR-16-5p hsa-miR-21-5p hsa-miR-29a-3p hsa-miR-29a-3p hsa-miR-29b-3p hsa-miR-29b-3p
CALM2	NC_000002.12	47160082	47174207	-	NM_001305626.1	4366	47160300	3' UTR	CCAGA	51	0.979592	0.999951	NO	NO	hsa-miR-106a-5p
MAP1S	NC_000019.10	17720156	17734513	+	NM_001308363.2	2578	17727805	CDS	GCAGA	9	1	0.999901	NO	NO	hsa-miR-4677-3p
PIGBOS1	NC_000015.10	55317184	55319123	-	NM_001308422.2	743	55317342	3' UTR	AGACT	9	0.875	0.999979	YES	YES	NO
VKORC1	NC_000016.10	31090854	31094797	-	NM_001311311.2	792	31090986	3' UTR	GGACC	24	0.434783	0.999984	YES	YES	NO
RHOA	NC_000003.12	49359145	49411976	-	NM_001313941.2	979	49360066	3' UTR	AGAAG	40	0.891892	0.999979	NO	NO	hsa-miR-26a-5p hsa-miR-26b-5p hsa-miR-26a-5p hsa-miR-26b-5p hsa-miR-29b-2-5p hsa-miR-26a-5p hsa-miR-26b-5p
RHOA	NC_000003.12	49359145	49411976	-	NM_001313941.2	980	49360065	3' UTR	GAAGC	40	0.945946	0.999979	NO	NO	hsa-miR-26a-5p hsa-miR-26b-5p hsa-miR-26a-5p hsa-miR-26b-5p hsa-miR-29b-2-5p hsa-miR-26a-5p hsa-miR-26b-5p
RHOA	NC_000003.12	49359145	49411976	-	NM_001313943.2	1024	49360065	3' UTR	GAAGC	16	1	0.999934	NO	NO	hsa-miR-26a-5p hsa-miR-26b-5p hsa-miR-26a-5p hsa-miR-26b-5p hsa-miR-29b-2-5p hsa-miR-26a-5p hsa-miR-26b-5p
RHOA	NC_000003.12	49359145	49411976	-	NM_001313944.2	1564	49359326	3' UTR	GGACT	30	0.565217	0.999932	YES	YES	NO
RHOA	NC_000003.12	49359145	49411976	-	NM_001313945.2	762	49360065	3' UTR	GAAGC	19	0.9375	0.999923	NO	NO	hsa-miR-26a-5p hsa-miR-26b-5p hsa-miR-26a-5p hsa-miR-26b-5p hsa-miR-29b-2-5p hsa-miR-26a-5p hsa-miR-26b-5p
RHOA	NC_000003.12	49359145	49411976	-	NM_001313947.2	764	49360065	3' UTR	GAAGC	32	1	0.999986	NO	NO	hsa-miR-26a-5p hsa-miR-26b-5p hsa-miR-26a-5p hsa-miR-26b-5p hsa-miR-29b-2-5p hsa-miR-26a-5p hsa-miR-26b-5p
TFRC	NC_000003.12	196049284	196082090	-	NM_001313966.2	4590	196049308	3' UTR	TGATT	30	0.571429	0.999981	NO	NO	NO
PLOD1	NC_000001.11	11934717	11975537	+	NM_001316320.2	2395	11974815	3' UTR	CCAGG	28	1	0.999994	NO	NO	hsa-miR-221-5p hsa-miR-149-5p
PLOD1	NC_000001.11	11934717	11975537	+	NM_001316320.2	2412	11974832	3' UTR	GGACC	31	0.806452	0.999988	YES	YES	NO
PLOD1	NC_000001.11	11934717	11975537	+	NM_001316320.2	2455	11974875	3' UTR	GGACC	42	0.238095	0.999963	YES	YES	NO
PLOD1	NC_000001.11	11934717	11975537	+	NM_001316320.2	2716	11975136	3' UTR	AGACT	49	0.804348	0.99995	YES	YES	hsa-miR-26a-5p hsa-miR-423-3p hsa-miR-26a-5p hsa-miR-484
PLOD1	NC_000001.11	11934717	11975537	+	NM_001316320.2	2756	11975176	3' UTR	AGACT	38	0.818182	0.999995	YES	YES	NO
PLOD1	NC_000001.11	11934717	11975537	+	NM_001316320.2	2815	11975235	3' UTR	GGACT	40	0.9	0.999991	YES	YES	NO
PLOD1	NC_000001.11	11934717	11975537	+	NM_001316320.2	2881	11975301	3' UTR	GGACT	47	0.978723	0.999992	YES	YES	NO
EIF2S2	NC_000020.11	34088309	34112243	-	NM_001316363.2	1174	34089682	3' UTR	GGACA	32	0.6875	0.999977	YES	YES	NO
EIF2S2	NC_000020.11	34088309	34112243	-	NM_001316364.2	1126	34089682	3' UTR	GGACA	31	0.580645	0.999957	YES	YES	NO
GLB1	NC_000003.12	32996617	33097146	-	NM_001317040.2	2183	32997101	CDS	AAAGA	14	1	0.999964	NO	NO	NO
GLB1	NC_000003.12	32996617	33097146	-	NM_001317040.2	2185	32997099	CDS	AGACT	15	1	0.999992	YES	YES	NO
MED19	NC_000011.10	57703710	57712215	-	NM_001317078.4	434	57705049	CDS	GAAGC	15	0.923077	0.999981	NO	NO	NO
MED19	NC_000011.10	57703710	57712215	-	NM_001317078.4	784	57704025	3' UTR	GGACT	25	0.409091	0.999964	YES	YES	hsa-miR-19b-3p hsa-miR-182-5p hsa-miR-34a-5p hsa-miR-19b-3p
MED19	NC_000011.10	57703710	57712215	-	NM_001317078.4	980	57703829	3' UTR	GGACA	17	0.6875	0.999986	YES	YES	NO
METAP2	NC_000012.12	95474152	95515839	+	NM_001317183.2	1496	95514004	3' UTR	GGACC	14	0.642857	0.999987	YES	NO	hsa-miR-92a-3p hsa-miR-92b-3p hsa-miR-363-3p hsa-miR-629-5p hsa-miR-92a-3p hsa-miR-92b-3p
METAP2	NC_000012.12	95474152	95515839	+	NM_001317183.2	1589	95514097	3' UTR	GGACT	18	0.875	0.999997	YES	NO	hsa-miR-106a-5p hsa-miR-106a-5p hsa-miR-106a-5p hsa-miR-548k
CDKN2AIP	NC_000004.12	183444636	183449064	+	NM_001317343.2	1457	183447010	3' UTR	AGACT	9	1	0.999916	YES	YES	NO
RPL26L1	NC_000005.10	172958880	172969771	+	NM_001317980.2	400	172968553	CDS	TGAGA	25	0.833333	0.99996	NO	NO	NO
DMAC1	NC_000009.12	7796500	7799778	-	NM_001318058.2	528	7798440	3' UTR	AGACT	25	0.666667	0.999927	YES	YES	NO
RRM1	NC_000011.10	4094685	4138925	+	NM_001318064.1	2630	4138484	3' UTR	GGACC	28	0.285714	0.99995	YES	YES	hsa-miR-194-5p hsa-miR-194-5p
RRM1	NC_000011.10	4116078	4138925	+	NM_001318065.1	2155	4138484	3' UTR	GGACC	25	0.26087	0.999977	YES	YES	hsa-miR-194-5p hsa-miR-194-5p
TMEM208	NC_000016.10	67227130	67229278	+	NM_001318217.2	397	67228523	5'UTR	GTATG	17	1	0.999926	NO	NO	NO
MRPL14	NC_000006.12	44113451	44127452	-	NM_001318771.2	503	44113816	3' UTR	GGACT	18	0.823529	0.999989	YES	YES	NO
DUSP23	NC_000001.11	159780962	159782543	+	NM_001319658.2	671	159782417	3' UTR	GGACT	11	0.727273	0.999971	YES	YES	NO
DUSP23	NC_000001.11	159780962	159782543	+	NM_001319659.2	573	159782417	3' UTR	GGACT	8	1	0.999956	YES	YES	NO
SPSB2	NC_000012.12	6870935	6873303	-	NM_001319670.2	557	6872747	CDS	AGACT	10	1	0.999979	YES	NO	NO
CSNK1G2	NC_000019.10	1941172	1981338	+	NM_001319.7	1954	1980397	3' UTR	AGACT	10	1	0.999953	YES	YES	hsa-miR-4435 hsa-miR-20a-5p hsa-miR-550a-3p hsa-miR-17-5p hsa-miR-106a-5p hsa-miR-4435 hsa-miR-550a-3p hsa-miR-17-5p hsa-miR-106a-5p hsa-miR-20a-5p hsa-miR-17-5p hsa-miR-106a-5p hsa-miR-106a-5p hsa-miR-17-5p hsa-miR-20a-5p hsa-miR-17-5p hsa-miR-200a-5p hsa-miR-106a-5p hsa-miR-17-5p
CSNK1G2	NC_000019.10	1941172	1981338	+	NM_001319.7	2692	1981135	3' UTR	GGACT	11	1	0.999962	YES	YES	NO
SYNGR2	NC_000017.11	78168545	78172964	+	NM_001320523.2	660	78171989	3' UTR	GGACT	7	0.857143	0.999921	YES	YES	NO
SYNGR2	NC_000017.11	78168545	78172964	+	NM_001320523.2	999	78172328	3' UTR	AGACT	18	0.888889	0.999996	YES	YES	hsa-miR-193a-5p hsa-miR-101-3p hsa-miR-125b-1-3p hsa-miR-101-3p
BOLA2-SMG1P6	NC_000016.10	29442905	29454964	-	NM_001320623.1	1467	29443317	3' UTR	CAAAC	36	0.909091	0.999971	NO	NO	NO
BOLA2-SMG1P6	NC_000016.10	29442905	29454964	-	NM_001320623.1	1468	29443316	3' UTR	AAACA	37	0.914286	0.999931	YES	NO	NO
RWDD2B	NC_000021.9	29004384	29019349	-	NM_001320724.2	1048	29006499	CDS	GGACT	7	1	0.999951	YES	YES	hsa-miR-17-5p hsa-miR-20a-5p hsa-miR-93-5p
SAT2	NC_000017.11	7626234	7627876	-	NM_001320845.1	671	7626547	CDS	GGACT	19	0.526316	0.999945	YES	YES	NO
AHSA1	NC_000014.9	77457867	77469472	+	NM_001321441.2	1024	77469220	CDS	AGACC	29	0.275862	0.999929	YES	YES	hsa-miR-452-5p hsa-miR-760
RTN4	NC_000002.12	54972189	55050598	-	NM_001321860.1	3981	54972369	3' UTR	GGACT	36	0.612903	0.999952	YES	YES	hsa-miR-21-5p
BSG	NC_000019.10	572596	583493	+	NM_001322243.2	1340	583239	3' UTR	GGACT	118	0.734513	0.999993	YES	YES	hsa-miR-148b-5p hsa-miR-125a-3p hsa-miR-203b-5p
TMEM183A	NC_000001.11	203007374	203024848	+	NM_001322957.2	1357	203023182	3' UTR	GGAGA	8	0.625	0.99992	NO	NO	NO
CCN5	NC_000020.11	44715369	44727811	+	NM_001323369.2	921	44727700	3' UTR	GGACT	32	0.571429	0.999946	YES	NO	NO
RPN2	NC_000020.11	37179330	37241619	+	NM_001324302.2	311	37198473	CDS	CCAGG	21	1	0.999957	NO	NO	NO
INTS3	NC_000001.11	153728050	153774808	+	NM_001324475.2	3406	153773303	3' UTR	GGACT	12	0.5	0.999957	YES	NO	hsa-miR-423-5p hsa-miR-34a-5p hsa-miR-34a-5p hsa-miR-34c-5p
IFNGR2	NC_000021.9	33402882	33437516	+	NM_001329128.2	1807	33437036	3' UTR	GGACT	11	0.818182	0.999974	YES	YES	NO
TMEM243	NC_000007.14	87196160	87220539	-	NM_001329474.2	402	87219496	CDS	GGACT	19	0.555556	0.999964	YES	YES	hsa-miR-106b-5p hsa-miR-17-5p hsa-miR-19a-3p hsa-miR-19b-3p hsa-miR-205-5p
TRUB2	NC_000009.12	128305159	128322447	-	NM_001329861.2	962	128309491	3' UTR	GGACC	10	0.7	0.99995	YES	YES	NO
RRM1	NC_000011.10	4116078	4138925	+	NM_001330193.1	2113	4138484	3' UTR	GGACC	25	0.304348	0.999963	YES	YES	hsa-miR-194-5p hsa-miR-194-5p
METAP2	NC_000012.12	95474152	95515839	+	NM_001330246.2	1562	95514004	3' UTR	GGACC	15	0.714286	0.999984	YES	NO	hsa-miR-92a-3p hsa-miR-92b-3p hsa-miR-363-3p hsa-miR-629-5p hsa-miR-92a-3p hsa-miR-92b-3p
DUT	NC_000015.10	48331095	48343373	+	NM_001330286.2	897	48342399	3' UTR	AAAAA	30	0.866667	0.999997	NO	NO	NO
DUT	NC_000015.10	48331095	48343373	+	NM_001330286.2	898	48342400	3' UTR	AAAAA	30	0.896552	0.999989	NO	NO	NO
DUT	NC_000015.10	48331095	48343373	+	NM_001330286.2	899	48342401	3' UTR	AAAAA	28	0.923077	0.999983	NO	NO	NO
TPM1	NC_000015.10	63048489	63071915	+	NM_001330344.2	329	63057094	CDS	TGAGA	39	0.71875	0.999954	NO	NO	NO
ANAPC5	NC_000012.12	121308245	121352411	-	NM_001330489.2	2346	121308434	3' UTR	GGACT	34	0.5	0.999946	YES	NO	NO
EIF4B	NC_000012.12	53006456	53042215	+	NM_001330654.2	1239	53037430	CDS	TGAGA	54	0.934783	0.999958	NO	NO	NO
EIF4B	NC_000012.12	53006456	53042215	+	NM_001330654.2	3009	53041485	3' UTR	CCAGA	30	0.791667	0.99999	NO	NO	NO
PSMD4	NC_000001.11	151254734	151267460	+	NM_001330692.2	450	151265197	CDS	GGAGA	22	0.9	0.999978	NO	NO	NO
PSMD4	NC_000001.11	151254734	151267460	+	NM_001330692.2	452	151265199	CDS	AGAAA	19	1	0.999968	NO	NO	NO
PSMD4	NC_000001.11	151254734	151267460	+	NM_001330692.2	453	151265200	CDS	GAAAG	19	0.823529	0.999962	NO	NO	NO
CTSV	NC_000009.12	97029677	97039142	-	NM_001333.4	672	97036554	CDS	GGACT	13	0.666667	0.999957	YES	YES	NO
CTSZ	NC_000020.11	58995185	59007254	-	NM_001336.4	1327	58995360	3' UTR	GGACT	15	0.571429	0.999974	YES	YES	hsa-miR-26a-5p hsa-miR-26b-5p
DAB2	NC_000005.10	39371677	39424980	-	NM_001343.4	2310	39376755	CDS	GGACT	14	0.714286	0.999994	YES	YES	NO
TNFRSF1A	NC_000012.12	6328771	6342076	-	NM_001346091.2	1505	6329283	3' UTR	GGACC	14	1	0.99999	YES	NO	NO
TNFRSF1A	NC_000012.12	6328771	6342076	-	NM_001346091.2	1984	6328804	3' UTR	GGACT	11	0.909091	0.999993	YES	NO	hsa-miR-19a-3p hsa-miR-19b-3p hsa-miR-19a-3p hsa-miR-19b-3p hsa-miR-3184-3p hsa-miR-140-3p hsa-miR-19b-3p hsa-miR-425-5p hsa-miR-19a-3p hsa-miR-19b-3p hsa-miR-19b-3p hsa-miR-19b-3p
TNFRSF1A	NC_000012.12	6328771	6342076	-	NM_001346092.2	2256	6328804	3' UTR	GGACT	9	0.888889	0.999964	YES	NO	hsa-miR-19a-3p hsa-miR-19b-3p hsa-miR-19a-3p hsa-miR-19b-3p hsa-miR-3184-3p hsa-miR-140-3p hsa-miR-19b-3p hsa-miR-425-5p hsa-miR-19a-3p hsa-miR-19b-3p hsa-miR-19b-3p hsa-miR-19b-3p
NBDY	NC_000023.11	56729243	56819179	+	NM_001348129.2	69	56729311	5'UTR	CCAGG	70	1	0.999996	NO	NO	NO
ANKRD9	NC_000014.9	102501767	102509776	-	NM_001348651.2	1286	102507192	CDS	GGACC	15	0.4	0.99997	YES	YES	hsa-miR-98-5p hsa-let-7f-5p
ANKRD9	NC_000014.9	102501767	102509776	-	NM_001348651.2	1382	102507096	CDS	GGACA	19	0.4375	0.999926	YES	YES	NO
ANKRD9	NC_000014.9	102501767	102509776	-	NM_001348651.2	1523	102506955	CDS	GGACC	9	0.666667	0.999964	YES	YES	hsa-let-7e-5p hsa-miR-34a-5p hsa-miR-15a-3p
ANKRD9	NC_000014.9	102501767	102509776	-	NM_001348651.2	1566	102506912	3' UTR	GGATT	21	0.75	0.999994	NO	NO	NO
ANKRD9	NC_000014.9	102501767	102509776	-	NM_001348651.2	1574	102506904	3' UTR	GGACA	20	0.7	0.999991	YES	YES	NO
ANKRD9	NC_000014.9	102501767	102509776	-	NM_001348652.2	1074	102507192	CDS	GGACC	20	0.45	0.999992	YES	YES	hsa-miR-98-5p hsa-let-7f-5p
ANKRD9	NC_000014.9	102501767	102509776	-	NM_001348652.2	1170	102507096	CDS	GGACA	23	0.65	0.999985	YES	YES	NO
ANKRD9	NC_000014.9	102501767	102509776	-	NM_001348652.2	1311	102506955	CDS	GGACC	10	0.6	0.999944	YES	YES	hsa-let-7e-5p hsa-miR-34a-5p hsa-miR-15a-3p
ANKRD9	NC_000014.9	102501767	102509776	-	NM_001348652.2	1354	102506912	3' UTR	GGATT	25	0.952381	0.999956	NO	NO	NO
ANKRD9	NC_000014.9	102501767	102509776	-	NM_001348652.2	1362	102506904	3' UTR	GGACA	24	0.708333	0.999964	YES	YES	NO
DARS1	NC_000002.12	135905881	135985626	-	NM_001349.4	87	135985540	5'UTR	GGAGA	11	0.888889	0.999919	NO	NO	NO
RPS27	NC_000001.11	153990762	153992155	+	NM_001349946.2	457	153992139	3' UTR	ACATT	59	0.530612	0.99991	NO	NO	hsa-miR-17-5p hsa-miR-19b-3p hsa-let-7g-5p hsa-let-7a-5p hsa-let-7i-5p hsa-let-7b-5p hsa-let-7c-5p hsa-let-7f-5p
DBP	NC_000019.10	48630030	48637379	-	NM_001352.5	1410	48630790	3' UTR	TGAGA	34	0.724138	0.999921	NO	NO	NO
DBP	NC_000019.10	48630030	48637379	-	NM_001352.5	1412	48630788	3' UTR	AGACT	26	0.608696	0.999986	YES	YES	NO
DBP	NC_000019.10	48630030	48637379	-	NM_001352.5	1474	48630726	3' UTR	GGACG	20	0.5	0.999985	NO	NO	NO
SMIM30	NC_000007.14	113116718	113118554	-	NM_001352687.2	483	113117334	3' UTR	TGAGA	28	1	0.999998	NO	NO	NO
SMIM30	NC_000007.14	113116718	113118554	-	NM_001352687.2	485	113117332	3' UTR	AGATT	27	1	0.999987	NO	NO	NO
SMIM30	NC_000007.14	113116718	113118554	-	NM_001352688.2	395	113117334	3' UTR	TGAGA	33	1	0.999987	NO	NO	NO
SMIM30	NC_000007.14	113116718	113118554	-	NM_001352688.2	397	113117332	3' UTR	AGATT	33	1	0.999991	NO	NO	NO
C11orf86	NC_000011.10	66975304	66977009	+	NM_001353554.2	519	66976360	3' UTR	GGACT	27	0.96	0.999991	YES	YES	NO
C11orf86	NC_000011.10	66975304	66977009	+	NM_001353554.2	695	66976536	3' UTR	GGACT	30	0.966667	0.999997	YES	YES	NO
C11orf86	NC_000011.10	66975304	66977009	+	NM_001353554.2	828	66976669	3' UTR	GGACG	28	0.958333	0.999956	NO	NO	NO
GRAMD1B	NC_000011.10	123430269	123435715	+	NM_001354837.2	1008	123435543	3' UTR	AGACA	15	0.818182	0.999951	YES	YES	NO
MYC	NC_000008.11	127735434	127742951	+	NM_001354870.1	2455	127740891	CDS	GGACT	64	0.574074	0.999937	YES	YES	hsa-miR-196a-3p hsa-miR-194-5p hsa-miR-194-5p hsa-let-7a-5p
MYC	NC_000008.11	127735434	127742951	+	NM_001354870.1	2633	127741069	3' UTR	TGAGA	71	0.7	0.999966	NO	NO	hsa-miR-5100 hsa-miR-5100 hsa-miR-5100 hsa-miR-30a-3p hsa-miR-30e-3p hsa-miR-30a-3p hsa-miR-499a-5p hsa-miR-516a-5p hsa-miR-30d-3p hsa-miR-30a-3p hsa-miR-30d-3p hsa-miR-30e-3p hsa-miR-516a-5p hsa-miR-300 hsa-miR-125a-3p hsa-miR-4677-3p hsa-miR-3159 hsa-miR-34c-5p hsa-miR-148b-5p hsa-miR-3168 hsa-miR-940 hsa-miR-1294 hsa-let-7b-3p hsa-miR-1248 hsa-miR-92a-3p hsa-miR-455-3p hsa-miR-24-3p hsa-let-7a…
MYC	NC_000008.11	127735434	127742951	+	NM_001354870.1	2635	127741071	3' UTR	AGACT	72	0.66129	0.999986	YES	YES	hsa-miR-5100 hsa-miR-5100 hsa-miR-5100 hsa-miR-30a-3p hsa-miR-30e-3p hsa-miR-30a-3p hsa-miR-516a-5p hsa-miR-30d-3p hsa-miR-30a-3p hsa-miR-30d-3p hsa-miR-30e-3p hsa-miR-516a-5p hsa-miR-300 hsa-miR-125a-3p hsa-miR-4677-3p hsa-miR-3159 hsa-miR-34c-5p hsa-miR-148b-5p hsa-miR-3168 hsa-miR-940 hsa-miR-1294 hsa-let-7b-3p hsa-miR-1248 hsa-miR-92a-3p hsa-miR-455-3p hsa-miR-24-3p hsa-let-7a-5p hsa-miR-135b…
MYC	NC_000008.11	127735434	127742951	+	NM_001354870.1	2675	127741111	3' UTR	GGACT	66	0.904762	0.999999	YES	YES	hsa-miR-17-5p hsa-miR-20a-5p hsa-miR-20b-5p hsa-miR-93-5p hsa-miR-20a-5p hsa-miR-93-5p hsa-miR-17-5p hsa-miR-20a-5p hsa-miR-93-5p hsa-miR-17-5p hsa-miR-20a-5p hsa-miR-93-5p hsa-miR-17-5p hsa-miR-20a-5p hsa-miR-93-5p hsa-miR-148a-5p hsa-miR-148a-5p hsa-miR-300 hsa-miR-125a-3p hsa-miR-4677-3p hsa-miR-3159 hsa-miR-34c-5p hsa-miR-148b-5p hsa-miR-940 hsa-miR-1294 hsa-let-7b-3p hsa-miR-1248 hsa-miR-92a…
VCP	NC_000009.12	35056064	35072625	-	NM_001354927.2	2792	35057078	3' UTR	GGACC	23	0.363636	0.999987	YES	YES	NO
VCP	NC_000009.12	35056064	35072625	-	NM_001354928.2	3312	35057078	3' UTR	GGACC	38	0.378378	0.999989	YES	YES	NO
MMP24OS	NC_000020.11	35276352	35278122	-	NM_001355003.2	553	35277494	3' UTR	CCAGA	10	1	0.99998	NO	NO	hsa-miR-320b hsa-miR-320a-3p
PPP2CA	NC_000005.10	134194332	134225554	-	NM_001355019.2	1299	134197647	3' UTR	GGACC	12	0.833333	0.999932	YES	YES	hsa-miR-182-5p hsa-miR-34a-5p hsa-miR-182-5p hsa-miR-34a-5p hsa-miR-133a-3p hsa-miR-34a-5p hsa-miR-182-5p hsa-miR-34a-5p hsa-miR-34a-5p hsa-miR-182-5p hsa-miR-27a-3p hsa-miR-27b-3p
RPA1	NC_000017.11	1830005	1900082	+	NM_001355120.2	2065	1897292	3' UTR	GGACT	18	0.944444	0.999999	YES	YES	NO
RPA1	NC_000017.11	1830005	1900082	+	NM_001355120.2	2551	1897778	3' UTR	ATAGA	26	0.9	0.999949	NO	NO	hsa-miR-24-3p hsa-miR-345-5p hsa-miR-24-3p hsa-miR-24-3p hsa-miR-345-5p hsa-miR-423-3p
NCBP2AS2	NC_000003.12	196942674	196943543	+	NM_001355243.2	827	196943500	3' UTR	GGACT	76	0.594595	0.999993	YES	YES	hsa-miR-101-3p hsa-miR-101-3p hsa-miR-139-5p
CD24	NC_000006.12	106969831	106974729	-	NM_001359084.1	677	106971310	3' UTR	GGATT	8	0.714286	0.999918	NO	NO	NO
DHCR7	NC_000011.10	71434411	71448393	-	NM_001360.3	1608	71435430	CDS	GGACT	33	0.666667	0.999969	YES	YES	hsa-miR-27b-3p hsa-miR-27a-3p hsa-miR-199a-5p hsa-miR-30e-3p hsa-miR-27a-3p hsa-miR-30d-3p hsa-miR-27b-3p
DHCR7	NC_000011.10	71434411	71448393	-	NM_001360.3	2200	71434838	3' UTR	GGACA	30	0.733333	0.999965	YES	YES	NO
EIF3B	NC_000007.14	2354086	2380745	+	NM_001362792.2	2417	2380363	3' UTR	GGACT	15	1	0.999996	YES	YES	hsa-miR-27a-3p hsa-miR-23a-3p hsa-miR-27b-3p hsa-miR-4454 hsa-miR-128-3p hsa-miR-26a-5p hsa-miR-132-3p hsa-miR-101-3p hsa-miR-1910-5p hsa-miR-128-3p hsa-miR-27b-3p hsa-miR-26a-5p hsa-miR-23b-3p hsa-miR-128-3p hsa-miR-23a-3p hsa-miR-582-5p hsa-miR-23a-3p hsa-miR-27b-3p hsa-miR-23a-3p hsa-miR-27a-3p hsa-miR-101-3p hsa-miR-27a-3p hsa-miR-27a-3p hsa-miR-128-3p hsa-miR-101-3p
EIF3B	NC_000007.14	2354086	2380745	+	NM_001362793.2	2342	2380363	3' UTR	GGACT	11	0.818182	0.999928	YES	YES	hsa-miR-27a-3p hsa-miR-23a-3p hsa-miR-27b-3p hsa-miR-4454 hsa-miR-128-3p hsa-miR-26a-5p hsa-miR-132-3p hsa-miR-101-3p hsa-miR-1910-5p hsa-miR-128-3p hsa-miR-27b-3p hsa-miR-26a-5p hsa-miR-23b-3p hsa-miR-128-3p hsa-miR-23a-3p hsa-miR-582-5p hsa-miR-23a-3p hsa-miR-27b-3p hsa-miR-23a-3p hsa-miR-27a-3p hsa-miR-101-3p hsa-miR-27a-3p hsa-miR-27a-3p hsa-miR-128-3p hsa-miR-101-3p
PUF60	NC_000008.11	143816344	143829041	-	NM_001362896.2	1922	143816627	CDS	AGACT	10	0.888889	0.999907	YES	YES	hsa-miR-627-5p hsa-miR-193a-5p
CALM1	NC_000014.9	90396502	90408268	+	NM_001363669.2	1319	90405432	3' UTR	GGACT	23	0.565217	0.999988	YES	YES	NO
SYNGR2	NC_000017.11	78168545	78172964	+	NM_001363778.1	1228	78172328	3' UTR	AGACT	16	0.857143	0.999985	YES	YES	hsa-miR-193a-5p hsa-miR-101-3p hsa-miR-125b-1-3p hsa-miR-101-3p
MRPL35	NC_000002.12	86199433	86213794	+	NM_001363782.1	660	86213717	3' UTR	GGACT	10	0.8	0.999975	YES	YES	NO
METRNL	NC_000017.11	83081146	83095122	+	NM_001363853.2	1129	83094508	CDS	GGACT	7	1	0.999973	YES	YES	NO
FXR1	NC_000003.12	180912671	180982753	+	NM_001363882.1	2373	180976532	3' UTR	AAAAA	21	1	0.999963	NO	NO	NO
MSL1	NC_000017.11	40121971	40130307	+	NM_001365921.2	2006	40129616	CDS	GGAGA	27	0.96	0.999998	NO	NO	hsa-miR-139-5p hsa-miR-221-3p hsa-miR-221-3p hsa-miR-139-5p hsa-miR-221-3p hsa-miR-139-5p hsa-miR-221-3p
MSL1	NC_000017.11	40121971	40130307	+	NM_001365921.2	2008	40129618	CDS	AGACT	23	0.956522	0.999999	YES	YES	hsa-miR-139-5p hsa-miR-221-3p hsa-miR-92a-3p hsa-miR-221-3p hsa-miR-92a-3p hsa-miR-139-5p hsa-miR-221-3p hsa-miR-92a-3p hsa-miR-139-5p hsa-miR-221-3p
SAC3D1	NC_000011.10	65040933	65044828	+	NM_001367485.1	1039	65044508	CDS	GGACT	24	1	0.999981	YES	YES	NO
SAC3D1	NC_000011.10	65040933	65044828	+	NM_001367485.1	513	65041624	CDS	GGACC	21	0.428571	0.999993	YES	YES	NO
SAC3D1	NC_000011.10	65040933	65044828	+	NM_001367487.1	1179	65044508	3' UTR	GGACT	12	0.7	0.999919	YES	YES	NO
TPM4	NC_000019.10	16067538	16103002	+	NM_001367836.1	1797	16101977	3' UTR	TAATT	37	1	0.999907	NO	NO	NO
SCARB1	NC_000012.12	124776856	124863864	-	NM_001367985.1	2277	124777960	3' UTR	GGACT	10	0.75	0.999933	YES	NO	hsa-miR-17-5p hsa-miR-1180-3p
PDLIM2	NC_000008.11	22580475	22594298	+	NM_001368120.1	1354	22594075	3' UTR	GGACT	23	0.409091	0.999935	YES	YES	NO
SS18L2	NC_000003.12	42590860	42596934	+	NM_001370300.1	551	42594788	3' UTR	AGACA	14	0.357143	0.999925	YES	YES	hsa-miR-9-5p
SUMO1	NC_000002.12	202206171	202238597	-	NM_001371393.1	750	202206883	3' UTR	GGACT	9	0.75	0.999924	YES	YES	NO
MRPS2	NC_000009.12	135499965	135504673	+	NM_001371401.1	1070	135504084	CDS	GGACC	35	0.65625	0.999961	YES	YES	NO
MRPS2	NC_000009.12	135499965	135504673	+	NM_001371401.1	1281	135504295	3' UTR	GGACC	40	0.6	0.999971	YES	YES	hsa-miR-34a-5p hsa-miR-34a-5p hsa-miR-34a-5p
MRPS2	NC_000009.12	135499965	135504673	+	NM_001371401.1	1370	135504384	3' UTR	GGACC	40	0.617647	0.999975	YES	YES	NO
MRPS2	NC_000009.12	135499965	135504673	+	NM_001371401.1	1605	135504619	3' UTR	CCAGG	39	1	0.999997	NO	NO	NO
MRPS2	NC_000009.12	135499965	135504673	+	NM_001371401.1	587	135503601	CDS	ACAGA	28	0.962963	0.999989	NO	NO	hsa-miR-193a-5p hsa-miR-375-3p
GET3	NC_000019.10	12737106	12748323	+	NM_001371488.1	906	12747485	CDS	AGATT	42	0.911765	0.999929	NO	NO	hsa-miR-25-3p hsa-miR-592 hsa-miR-597-5p hsa-miR-92a-3p hsa-miR-92b-3p hsa-miR-23a-3p hsa-miR-92a-3p hsa-miR-92b-3p hsa-miR-25-3p hsa-miR-363-3p hsa-miR-92b-3p hsa-miR-25-3p hsa-miR-92b-3p hsa-miR-23b-3p hsa-miR-92a-3p
GET3	NC_000019.10	12737106	12748323	+	NM_001371489.1	943	12747485	CDS	AGATT	33	0.857143	0.999988	NO	NO	hsa-miR-25-3p hsa-miR-592 hsa-miR-597-5p hsa-miR-92a-3p hsa-miR-92b-3p hsa-miR-23a-3p hsa-miR-92a-3p hsa-miR-92b-3p hsa-miR-25-3p hsa-miR-363-3p hsa-miR-92b-3p hsa-miR-25-3p hsa-miR-92b-3p hsa-miR-23b-3p hsa-miR-92a-3p
WDR18	NC_000019.10	982928	994557	+	NM_001372085.1	1999	994440	3' UTR	GGACT	17	0.941176	0.999941	YES	YES	hsa-miR-151b hsa-miR-522-5p
WDR18	NC_000019.10	982928	994557	+	NM_001372086.1	1718	994440	3' UTR	GGACT	11	0.818182	0.999994	YES	YES	hsa-miR-151b hsa-miR-522-5p
POLR1D	NC_000013.11	27620743	27623449	+	NM_001374407.1	1301	27623104	CDS	AGACT	46	0.659091	0.999917	YES	YES	hsa-miR-187-3p hsa-miR-574-5p
DNASE2	NC_000019.10	12875209	12881449	-	NM_001375.3	1420	12875727	3' UTR	AGACT	80	0.582278	0.99998	YES	YES	NO
DNASE2	NC_000019.10	12875209	12881449	-	NM_001375.3	1784	12875363	3' UTR	GGACT	24	0.681818	0.999989	YES	YES	NO
DAPK3	NC_000019.10	3958453	3971099	-	NM_001375658.1	1832	3958806	3' UTR	GGACC	12	0.5	0.99997	YES	YES	NO
ARFIP2	NC_000011.10	6476519	6481331	-	NM_001376558.2	1203	6477079	3' UTR	AGACA	24	0.869565	0.99999	YES	YES	NO
ARFIP2	NC_000011.10	6476519	6481331	-	NM_001376558.2	1240	6477042	3' UTR	GGACA	21	0.428571	0.999947	YES	YES	NO
ARFIP2	NC_000011.10	6476519	6481331	-	NM_001376558.2	1540	6476742	3' UTR	GGACT	19	0.823529	0.999993	YES	YES	NO
KARS1	NC_000016.10	75627724	75647665	-	NM_001378148.1	1342	75631466	CDS	TGAGA	10	0.7	0.99997	NO	NO	hsa-miR-26a-5p hsa-miR-26a-5p hsa-miR-27a-5p
KARS1	NC_000016.10	75627724	75647665	-	NM_001378148.1	1344	75631464	CDS	AGAAA	10	0.875	0.99995	NO	NO	hsa-miR-6764-5p hsa-miR-1266-5p hsa-miR-27a-5p
DPM2	NC_000009.12	127935099	127937854	-	NM_001378437.1	549	127935372	3' UTR	GGACT	13	0.923077	0.999926	YES	YES	NO
MRPL34	NC_000019.10	17302865	17306843	+	NM_001382342.1	464	17306432	3' UTR	GGACC	33	0.272727	0.999982	YES	YES	hsa-miR-671-5p hsa-miR-331-5p hsa-miR-18b-5p
MRPL34	NC_000019.10	17302865	17306843	+	NM_001382342.1	515	17306483	3' UTR	GGACC	31	0.37931	0.999994	YES	YES	NO
MRPL34	NC_000019.10	17302865	17306843	+	NM_001382342.1	785	17306753	3' UTR	AAAGA	34	0.892857	0.999922	NO	NO	NO
MRPL34	NC_000019.10	17302865	17306843	+	NM_001382342.1	787	17306755	3' UTR	AGACA	31	0.714286	0.999998	YES	YES	NO
MRPL34	NC_000019.10	17302865	17306843	+	NM_001382342.1	789	17306757	3' UTR	ACAAT	31	0.678571	0.999946	NO	NO	NO
MRPL34	NC_000019.10	17305653	17306843	+	NM_001382343.1	474	17306483	3' UTR	GGACC	24	0.375	0.999986	YES	YES	NO
MRPL34	NC_000019.10	17305653	17306843	+	NM_001382343.1	746	17306755	3' UTR	AGACA	24	0.545455	0.999995	YES	YES	NO
DYNLRB1	NC_000020.11	34515602	34540958	+	NM_001382365.1	472	34540700	3' UTR	GGACT	92	0.636364	0.999989	YES	YES	hsa-miR-181a-2-3p hsa-miR-181a-2-3p hsa-miR-181a-2-3p
POR	NC_000007.14	75915155	75986855	+	NM_001382658.3	2574	75986510	3' UTR	AGACT	13	0.6	0.999934	YES	YES	NO
SAMD11	NC_000001.11	923923	944574	+	NM_001385640.1	2997	944103	CDS	GGACC	13	0.769231	0.999992	YES	YES	NO
SAMD11	NC_000001.11	923923	944574	+	NM_001385640.1	3177	944283	3' UTR	TGACT	18	0.9375	0.999988	YES	YES	NO
SAMD11	NC_000001.11	923923	944574	+	NM_001385641.1	2275	942771	CDS	GGACT	16	0.533333	0.999917	YES	YES	NO
SAMD11	NC_000001.11	923923	944574	+	NM_001385641.1	2994	944103	CDS	GGACC	16	0.5	0.999985	YES	YES	NO
SAMD11	NC_000001.11	923923	944574	+	NM_001385641.1	3174	944283	3' UTR	TGACT	21	0.833333	0.999973	YES	YES	NO
SCAND1	NC_000020.11	35953624	35959472	-	NM_001385710.1	1374	35953982	CDS	AGACT	64	0.509434	0.999982	YES	YES	hsa-miR-3913-5p hsa-miR-3913-5p hsa-miR-335-5p
SCAND1	NC_000020.11	35953624	35959472	-	NM_001385710.1	1727	35953629	3' UTR	GCAGC	14	0.928571	0.999935	NO	NO	NO
LOC128706665	NC_000020.11	10413708	10434222	-	NM_001394148.2	230	10420644	CDS	AAAGC	17	0.866667	0.999934	NO	NO	NO
CHRNA5	NC_000015.10	78565520	78595269	+	NM_001395171.1	774	78589965	CDS	GGACT	7	1	0.999984	YES	YES	NO
POR	NC_000007.14	75915155	75986855	+	NM_001395413.1	187	75954150	CDS	AGAAG	13	1	0.99998	NO	NO	NO
FDX2	NC_000019.10	10310045	10316015	-	NM_001397406.1	806	10310251	3' UTR	GGACT	10	0.9	0.999977	YES	YES	NO
MRPL34	NC_000019.10	17292573	17306843	+	NM_001400072.1	676	17306432	3' UTR	GGACC	38	0.184211	0.999943	YES	YES	hsa-miR-671-5p hsa-miR-331-5p hsa-miR-18b-5p
MRPL34	NC_000019.10	17292573	17306843	+	NM_001400072.1	727	17306483	3' UTR	GGACC	32	0.419355	0.999987	YES	YES	NO
MRPL34	NC_000019.10	17292573	17306843	+	NM_001400072.1	997	17306753	3' UTR	AAAGA	40	0.774194	0.999961	NO	NO	NO
MRPL34	NC_000019.10	17292573	17306843	+	NM_001400072.1	999	17306755	3' UTR	AGACA	34	0.433333	0.999983	YES	YES	NO
MRPL34	NC_000019.10	17292573	17306843	+	NM_001400073.1	1063	17306753	3' UTR	AAAGA	36	0.933333	0.999924	NO	NO	NO
MRPL34	NC_000019.10	17292573	17306843	+	NM_001400073.1	1065	17306755	3' UTR	AGACA	34	0.571429	0.999981	YES	YES	NO
MRPL34	NC_000019.10	17292573	17306843	+	NM_001400073.1	1067	17306757	3' UTR	ACAAT	34	0.535714	0.999936	NO	NO	NO
MRPL34	NC_000019.10	17292573	17306843	+	NM_001400073.1	793	17306483	3' UTR	GGACC	32	0.483871	0.999985	YES	YES	NO
EEF1A1	NC_000006.12	73515750	73521032	-	NM_001402.6	1613	73517649	3' UTR	GGACC	4922	0.0727881	1	YES	YES	hsa-miR-17-5p hsa-miR-106b-5p hsa-miR-9985
ZNF598	NC_000016.10	1997654	2009821	-	NM_001405664.1	2690	1998361	CDS	GGACT	8	0.75	0.999949	YES	NO	NO
ZNF598	NC_000016.10	1997654	2009821	-	NM_001405665.1	2642	1998361	CDS	GGACT	11	0.909091	0.999941	YES	NO	NO
LMNA	NC_000001.11	156082573	156140081	+	NM_001406983.1	2734	156139311	3' UTR	AAAAA	12	1	0.999986	NO	NO	NO
LMNA	NC_000001.11	156082573	156140081	+	NM_001406983.1	2735	156139312	3' UTR	AAAAA	12	1	0.999929	NO	NO	NO
LMNA	NC_000001.11	156082573	156140081	+	NM_001406983.1	2736	156139313	3' UTR	AAAAA	14	1	0.999977	NO	NO	NO
LMNA	NC_000001.11	156082573	156140081	+	NM_001406983.1	2737	156139314	3' UTR	AAAAA	13	1	0.999936	NO	NO	NO
LMNA	NC_000001.11	156114711	156140081	+	NM_001406986.1	2589	156139312	3' UTR	AAAAA	10	1	0.999931	NO	NO	NO
LMNA	NC_000001.11	156126170	156140081	+	NM_001406989.1	1895	156139308	3' UTR	AAAAA	10	1	0.999921	NO	NO	NO
LMNA	NC_000001.11	156126170	156140081	+	NM_001406989.1	1899	156139312	3' UTR	AAAAA	10	0.888889	0.999975	NO	NO	NO
LMNA	NC_000001.11	156126170	156140081	+	NM_001406989.1	1900	156139313	3' UTR	AAAAA	10	1	0.999994	NO	NO	NO
LMNA	NC_000001.11	156126170	156140081	+	NM_001406989.1	1901	156139314	3' UTR	AAAAA	10	1	0.999937	NO	NO	NO
LMNA	NC_000001.11	156106716	156140081	+	NM_001406991.1	1651	156136393	CDS	GGATG	15	1	0.999989	NO	NO	hsa-miR-197-3p hsa-miR-500a-3p
LMNA	NC_000001.11	156106716	156140081	+	NM_001406991.1	2512	156139309	3' UTR	AAAAA	14	1	0.999995	NO	NO	NO
LMNA	NC_000001.11	156106716	156140081	+	NM_001406991.1	2513	156139310	3' UTR	AAAAA	13	1	0.999957	NO	NO	NO
LMNA	NC_000001.11	156106716	156140081	+	NM_001406991.1	2514	156139311	3' UTR	AAAAA	13	1	0.999977	NO	NO	NO
LMNA	NC_000001.11	156106716	156140081	+	NM_001406991.1	2515	156139312	3' UTR	AAAAA	13	1	0.999995	NO	NO	NO
LMNA	NC_000001.11	156106716	156140081	+	NM_001406991.1	2516	156139313	3' UTR	AAAAA	13	1	0.999975	NO	NO	NO
LMNA	NC_000001.11	156106716	156140081	+	NM_001406991.1	2517	156139314	3' UTR	AAAAA	12	1	0.999908	NO	NO	NO
NR2F1	NC_000005.10	93587099	93594611	+	NM_001410754.1	1296	93594184	3' UTR	GGACC	8	0.875	0.999926	YES	YES	NO
NR2F1	NC_000005.10	93587099	93594611	+	NM_001410754.1	990	93593878	3' UTR	AGAGA	9	1	0.999911	NO	NO	NO
NR2F1	NC_000005.10	93587099	93594611	+	NM_001410754.1	992	93593880	3' UTR	AGACT	9	0.875	0.999937	YES	YES	NO
OS9	NC_000012.12	57694132	57721557	+	NM_001410978.1	2039	57720956	3' UTR	GGACT	7	0.857143	0.999958	YES	NO	hsa-miR-361-3p
OS9	NC_000012.12	57694132	57721557	+	NM_001410980.1	2084	57720956	3' UTR	GGACT	13	0.692308	0.999957	YES	NO	hsa-miR-361-3p
UBALD1	NC_000016.10	4608884	4614888	-	NM_001411032.1	1304	4609139	3' UTR	GGACT	7	0.857143	0.999936	YES	YES	hsa-miR-145-5p hsa-miR-19a-3p
UBALD1	NC_000016.10	4608884	4614888	-	NM_001411032.1	940	4609503	3' UTR	GGACT	8	0.875	0.999966	YES	YES	NO
FMNL1	NC_000017.11	45221885	45247318	+	NM_001411128.1	3864	45247279	3' UTR	GGACC	29	0.206897	0.999973	YES	YES	NO
ACTN4	NC_000019.10	38647649	38731589	+	NM_001411143.1	3536	38730135	3' UTR	AAAAA	30	0.888889	0.999919	NO	NO	NO
EIF1AX	NC_000023.11	20124525	20141838	-	NM_001412.4	749	20128190	3' UTR	AGACT	70	0.6	0.999968	YES	NO	NO
EIF2B1	NC_000012.12	123620406	123633686	-	NM_001414.4	1170	123621633	3' UTR	GGACT	30	0.8	0.999998	YES	NO	NO
EIF2B1	NC_000012.12	123620406	123633686	-	NM_001414.4	1461	123621342	3' UTR	GGACG	30	0.8	0.999947	NO	NO	NO
TMBIM6	NC_000012.12	49741557	49764934	+	NM_001414462.1	2778	49764716	3' UTR	AAAAA	28	0.75	0.999952	NO	NO	NO
EIF2S3	NC_000023.11	24054956	24078810	+	NM_001415.4	2148	24077501	3' UTR	AGACT	18	0.777778	0.99991	YES	YES	hsa-miR-132-3p hsa-miR-132-3p hsa-miR-1285-3p hsa-miR-24-3p
EIF2S3	NC_000023.11	24054956	24078810	+	NM_001415.4	2315	24077668	3' UTR	GGACA	17	0.5625	0.999963	YES	YES	hsa-miR-200c-3p hsa-miR-548k hsa-miR-200c-3p hsa-miR-1285-3p hsa-miR-24-3p
EIF2S3	NC_000023.11	24054956	24078810	+	NM_001415.4	601	24062525	CDS	AAAGA	20	0.894737	0.999997	NO	NO	hsa-miR-345-5p
EIF2S3	NC_000023.11	24054956	24078810	+	NM_001415.4	603	24062527	CDS	AGAAA	25	0.875	0.999978	NO	NO	hsa-miR-345-5p
EIF2S3	NC_000023.11	24054956	24078810	+	NM_001415.4	604	24062528	CDS	GAAAG	25	0.863636	0.999911	NO	NO	hsa-miR-345-5p hsa-miR-96-5p
FOXF2	NC_000006.12	1389576	1395603	+	NM_001452.2	1952	1395104	3' UTR	GCAGA	15	1	0.99994	NO	NO	NO
FOXF2	NC_000006.12	1389576	1395603	+	NM_001452.2	1954	1395106	3' UTR	AGACT	15	0.733333	0.999925	YES	YES	NO
FZD2	NC_000017.11	44557484	44561262	+	NM_001466.4	1965	44559448	3' UTR	AGACT	53	0.901961	0.999996	YES	YES	NO
FZD2	NC_000017.11	44557484	44561262	+	NM_001466.4	718	44558201	CDS	GGACT	21	0.875	0.99995	YES	YES	NO
GTF2H4	NC_000006.12	30908207	30914106	+	NM_001517.5	1611	30914005	3' UTR	GGACC	29	0.925926	0.999987	YES	NO	NO
HDAC2	NC_000006.12	113933028	113971148	-	NM_001527.4	1815	113940950	3' UTR	GGACT	23	0.681818	0.999986	YES	YES	hsa-miR-101-3p hsa-miR-132-3p
HIF1A	NC_000014.9	61695513	61748258	+	NM_001530.4	189	61695701	5'UTR	GGACT	14	0.642857	0.999972	YES	YES	NO
HIF1A	NC_000014.9	61695513	61748258	+	NM_001530.4	2804	61747116	3' UTR	GGACA	28	0.444444	0.999978	YES	YES	hsa-miR-199a-5p
DNAJA1	NC_000009.12	33025273	33039907	+	NM_001539.4	1215	33038803	CDS	GGACT	124	0.289256	0.999907	YES	YES	hsa-miR-197-3p hsa-miR-182-5p hsa-miR-93-5p hsa-miR-4454 hsa-miR-182-5p
IGFBP4	NC_000017.11	40443450	40457725	+	NM_001552.3	1368	40456888	3' UTR	GGATT	17	1	0.999952	NO	NO	hsa-miR-203b-5p
CCN1	NC_000001.11	85580761	85583950	+	NM_001554.5	1366	85583038	CDS	GGACT	45	0.651163	0.999914	YES	YES	NO
CCN1	NC_000001.11	85580761	85583950	+	NM_001554.5	1553	85583225	3' UTR	GGACA	48	0.617021	0.999995	YES	YES	NO
AARS1	NC_000016.10	70252298	70289506	-	NM_001605.3	3097	70252638	3' UTR	GGACC	111	0.681818	0.999997	YES	YES	NO
ACTG1	NC_000017.11	81509971	81512799	-	NM_001614.5	1205	81510685	3' UTR	GGACT	468	0.611364	0.999928	YES	YES	hsa-miR-125a-5p hsa-miR-128-1-5p hsa-miR-125a-5p
AARS1	NC_000016.10	70252298	70289506	-	NM_001605.3	3333	70252402	3' UTR	GGACC	100	0.515789	0.999962	YES	YES	hsa-miR-32-5p hsa-miR-92a-3p hsa-miR-25-3p hsa-miR-92b-3p hsa-miR-363-3p hsa-miR-92a-3p hsa-miR-25-3p hsa-miR-183-5p hsa-miR-142-3p hsa-miR-4448 hsa-miR-32-5p hsa-miR-92b-3p hsa-miR-32-5p hsa-miR-92a-3p hsa-miR-92b-3p hsa-miR-25-3p hsa-miR-92a-3p hsa-miR-92b-3p hsa-miR-183-5p hsa-miR-25-3p hsa-miR-92a-3p hsa-miR-363-3p hsa-miR-32-5p hsa-miR-92b-3p hsa-miR-92b-3p hsa-miR-92b-3p hsa-miR-32-5p hsa-m…
ACP2	NC_000011.10	47239302	47248814	-	NM_001610.4	1701	47239712	3' UTR	GGACA	12	0.909091	0.999944	YES	YES	NO
PARP1	NC_000001.11	226360691	226408093	-	NM_001618.4	1218	226383141	CDS	AAAAA	13	1	0.999965	NO	NO	hsa-miR-4746-5p
AK2	NC_000001.11	33007986	33036883	-	NM_001625.4	756	33013200	CDS	AGACT	70	0.469697	0.999976	YES	YES	NO
ALPI	NC_000002.12	232456153	232460753	+	NM_001631.5	1907	232459419	3' UTR	AGACT	282	0.810811	0.999922	YES	YES	NO
ALPI	NC_000002.12	232456153	232460753	+	NM_001631.5	1955	232459467	3' UTR	GGACC	374	0.459239	0.999936	YES	YES	NO
ALPI	NC_000002.12	232456153	232460753	+	NM_001631.5	2266	232459778	3' UTR	GGACC	577	0.503731	0.999904	YES	YES	NO
ALPP	NC_000002.12	232378751	232382889	+	NM_001632.5	1816	232381951	3' UTR	GGACT	277	0.790262	0.999964	YES	YES	NO
ALPP	NC_000002.12	232378751	232382889	+	NM_001632.5	1858	232381993	3' UTR	GGACT	302	0.946309	1	YES	YES	NO
ALPP	NC_000002.12	232378751	232382889	+	NM_001632.5	1880	232382015	3' UTR	GGACT	256	0.560345	0.999942	YES	YES	NO
ALPP	NC_000002.12	232378751	232382889	+	NM_001632.5	2052	232382187	3' UTR	GGACT	342	0.822785	0.99993	YES	YES	NO
ALPP	NC_000002.12	232378751	232382889	+	NM_001632.5	2376	232382511	3' UTR	GGACA	409	0.8975	0.999998	YES	YES	NO
ALCAM	NC_000003.12	105366909	105576900	+	NM_001627.4	2477	105574676	3' UTR	ATAAT	10	1	0.999915	NO	NO	hsa-miR-192-5p hsa-miR-215-5p hsa-miR-29c-5p hsa-miR-192-5p hsa-miR-192-5p
ALCAM	NC_000003.12	105366909	105576900	+	NM_001627.4	4425	105576624	3' UTR	AAAAA	27	0.916667	0.999942	NO	NO	NO
ALPP	NC_000002.12	232378751	232382889	+	NM_001632.5	315	232379269	CDS	TGAGA	34	1	0.999995	NO	NO	NO
ALPP	NC_000002.12	232378751	232382889	+	NM_001632.5	317	232379271	CDS	AGATA	34	1	0.999997	NO	NO	NO
APEX1	NC_000014.9	20455226	20457767	+	NM_001641.4	1039	20457353	CDS	GGACT	87	0.847059	1	YES	YES	hsa-miR-142-5p hsa-miR-142-5p
ARAF	NC_000023.11	47561205	47571908	+	NM_001654.5	2112	47571642	3' UTR	AGACT	26	0.88	0.999993	YES	YES	hsa-miR-34a-5p
ARAF	NC_000023.11	47561205	47571908	+	NM_001654.5	2267	47571797	3' UTR	GGATT	25	0.708333	0.999984	NO	NO	hsa-miR-34a-5p
ARAF	NC_000023.11	47561205	47571908	+	NM_001654.5	2295	47571825	3' UTR	GGATT	29	0.888889	0.999997	NO	NO	hsa-miR-186-3p hsa-miR-34a-5p
ARAF	NC_000023.11	47561205	47571908	+	NM_001654.5	2336	47571866	3' UTR	GGACT	21	0.761905	0.999996	YES	YES	hsa-miR-151a-5p hsa-miR-151b hsa-miR-877-5p hsa-miR-1910-5p hsa-miR-151a-5p hsa-miR-877-5p hsa-miR-877-5p hsa-miR-34a-5p
ARF3	NC_000012.12	48935723	48957487	-	NM_001659.3	783	48938981	CDS	GGACT	113	0.559633	0.99998	YES	NO	NO
RHOA	NC_000003.12	49359145	49411976	-	NM_001664.4	885	49360065	3' UTR	GAAGC	233	0.981735	0.999955	NO	NO	hsa-miR-26a-5p hsa-miR-26b-5p hsa-miR-26a-5p hsa-miR-26b-5p hsa-miR-29b-2-5p hsa-miR-26a-5p hsa-miR-26b-5p
ARL4D	NC_000017.11	43398993	43401137	+	NM_001661.4	1011	43400570	3' UTR	GGACT	20	0.888889	0.999974	YES	YES	NO
ARL4D	NC_000017.11	43398993	43401137	+	NM_001661.4	262	43399821	CDS	GGACT	15	1	0.999986	YES	YES	hsa-miR-19b-3p
ARL4D	NC_000017.11	43398993	43401137	+	NM_001661.4	400	43399959	CDS	GGACG	14	0.642857	0.999989	NO	NO	NO
ARF6	NC_000014.9	49893082	49897054	+	NM_001663.4	1040	49894219	CDS	GGACT	18	1	0.999995	YES	YES	hsa-miR-376a-3p hsa-miR-423-3p hsa-miR-423-3p hsa-miR-423-3p
ARF6	NC_000014.9	49893082	49897054	+	NM_001663.4	521	49893700	5'UTR	GGACA	25	0.44	0.999963	YES	YES	NO
ARF6	NC_000014.9	49893082	49897054	+	NM_001663.4	823	49894002	CDS	GGACT	25	1	0.999981	YES	YES	hsa-miR-455-3p hsa-miR-455-3p
RHOG	NC_000011.10	3826978	3840959	-	NM_001665.4	487	3827786	CDS	GGACC	40	0.787879	0.999993	YES	YES	hsa-miR-27a-5p hsa-miR-30d-3p
RHOG	NC_000011.10	3826978	3840959	-	NM_001665.4	797	3827476	3' UTR	GGACT	42	0.757576	0.999907	YES	YES	NO
ATF4	NC_000022.11	39520559	39522686	+	NM_001675.4	1275	39521934	CDS	AGACT	31	0.636364	0.99994	YES	YES	hsa-miR-21-5p hsa-miR-21-5p
ATP1B1	NC_000001.11	169106690	169132719	+	NM_001677.4	946	169131449	CDS	GGACA	32	0.53125	0.999978	YES	YES	hsa-miR-152-3p hsa-miR-152-3p hsa-miR-152-3p
ATP6V0C	NC_000016.10	2513952	2520218	+	NM_001694.4	804	2519929	3' UTR	GGACA	161	0.291139	0.999919	YES	YES	hsa-miR-576-3p hsa-miR-145-3p
ATP5F1D	NC_000019.10	1241751	1244825	+	NM_001687.5	787	1244617	3' UTR	GGACT	70	0.323529	0.99995	YES	YES	NO
POLR3D	NC_000008.11	22245133	22254601	+	NM_001722.3	1616	22250881	3' UTR	GGACT	14	0.615385	0.999982	YES	YES	NO
BSG	NC_000019.10	572596	583493	+	NM_001728.4	1692	583239	3' UTR	GGACT	84	0.605263	0.999961	YES	YES	hsa-miR-148b-5p hsa-miR-125a-3p hsa-miR-203b-5p
BTG1	NC_000012.12	92140278	92145846	-	NM_001731.3	554	92144353	CDS	GGACA	44	0.439024	0.99995	YES	NO	hsa-miR-210-3p
CAMLG	NC_000005.10	134738548	134752157	+	NM_001745.4	1129	134751115	3' UTR	TTAAA	36	0.903226	0.999926	NO	NO	hsa-miR-129-1-3p hsa-miR-129-2-3p
CAMLG	NC_000005.10	134738548	134752157	+	NM_001745.4	417	134741234	CDS	GGACT	25	0.92	0.99998	YES	YES	NO
CBR1	NC_000021.9	36070024	36073164	+	NM_001757.4	890	36072846	CDS	GGACA	62	0.935484	0.99999	YES	YES	NO
CDA	NC_000001.11	20589097	20618903	+	NM_001785.3	112	20589208	CDS	AGAAG	175	0.687898	0.999918	NO	NO	NO
CDA	NC_000001.11	20589097	20618903	+	NM_001785.3	650	20618744	3' UTR	GGACT	286	0.575092	0.999967	YES	YES	hsa-miR-576-5p
ADGRE5	NC_000019.10	14381444	14408723	+	NM_001784.6	2649	14408461	3' UTR	GGACT	15	0.857143	0.999918	YES	YES	NO
SEPTIN7	NC_000007.14	35801057	35907110	+	NM_001788.6	1373	35903161	CDS	TGAGA	18	1	0.999981	NO	NO	hsa-miR-335-3p
SEPTIN7	NC_000007.14	35801057	35907110	+	NM_001788.6	1375	35903163	CDS	AGAAA	20	0.947368	0.999986	NO	NO	hsa-miR-148a-3p hsa-miR-335-3p
SEPTIN7	NC_000007.14	35801057	35907110	+	NM_001788.6	1376	35903164	CDS	GAAAG	20	0.95	0.999982	NO	NO	hsa-miR-145-5p hsa-miR-145-5p hsa-miR-145-5p hsa-miR-148a-3p hsa-miR-335-3p
CDK2	NC_000012.12	55966830	55972789	+	NM_001798.5	1158	55971707	3' UTR	GGACT	23	0.695652	0.999964	YES	NO	NO
CEBPG	NC_000019.10	33373709	33382686	+	NM_001806.4	844	33379800	3' UTR	AGACC	12	0.545455	0.999919	YES	YES	hsa-miR-1182 hsa-miR-193a-5p hsa-miR-627-5p hsa-miR-193a-5p hsa-miR-193a-5p
CENPA	NC_000002.12	26786056	26794589	+	NM_001809.4	675	26793875	3' UTR	GGACT	23	0.826087	0.999963	YES	YES	NO
CENPA	NC_000002.12	26786056	26794589	+	NM_001809.4	830	26794030	3' UTR	AGACT	23	0.894737	0.999982	YES	YES	NO
CENPB	NC_000020.11	3783851	3786740	-	NM_001810.6	1681	3785060	CDS	GGACT	44	0.909091	0.999945	YES	YES	hsa-miR-193a-3p
CENPB	NC_000020.11	3783851	3786740	-	NM_001810.6	1783	3784958	CDS	GGACT	51	0.8	0.999956	YES	YES	hsa-miR-15b-3p hsa-miR-15b-3p hsa-miR-1307-5p hsa-miR-1307-5p
CENPB	NC_000020.11	3783851	3786740	-	NM_001810.6	2045	3784696	CDS	GGACA	49	0.836735	0.999993	YES	YES	NO
CENPB	NC_000020.11	3783851	3786740	-	NM_001810.6	2116	3784625	3' UTR	GGACT	66	0.904762	0.999982	YES	YES	NO
CENPB	NC_000020.11	3783851	3786740	-	NM_001810.6	2359	3784382	3' UTR	GGACT	71	0.695652	0.999994	YES	YES	hsa-miR-181a-2-3p
CTSC	NC_000011.10	88293592	88337736	-	NM_001814.6	1522	88293940	3' UTR	AGACT	52	0.93617	0.999954	YES	YES	NO
CTSC	NC_000011.10	88293592	88337736	-	NM_001814.6	1529	88293933	3' UTR	AGACT	62	0.25	0.999917	YES	YES	NO
COX4I1	NC_000016.10	85799695	85807068	+	NM_001861.6	289	85805093	CDS	TGAGA	671	0.909699	0.999906	NO	NO	NO
CTNNA1	NC_000005.10	138753425	138935034	+	NM_001903.5	2926	138934206	3' UTR	GCAGA	17	1	0.999988	NO	NO	NO
CTNNA1	NC_000005.10	138753425	138935034	+	NM_001903.5	2928	138934208	3' UTR	AGACT	15	0.666667	0.999922	YES	YES	NO
CTSB	NC_000008.11	11842524	11868087	-	NM_001908.5	1238	11845019	3' UTR	GGACT	43	0.769231	0.999924	YES	YES	NO
CTSB	NC_000008.11	11842524	11868087	-	NM_001908.5	819	11847138	CDS	CGAGA	21	0.75	0.999944	NO	NO	hsa-miR-145-3p
DR1	NC_000001.11	93345907	93369493	+	NM_001938.3	1373	93360742	3' UTR	GGACT	30	0.633333	0.999995	YES	YES	NO
DUT	NC_000015.10	48332197	48343373	+	NM_001948.4	871	48342399	3' UTR	AAAAA	159	0.886525	0.999982	NO	NO	NO
DUT	NC_000015.10	48332197	48343373	+	NM_001948.4	872	48342400	3' UTR	AAAAA	156	0.828571	0.999994	NO	NO	NO
DR1	NC_000001.11	93345907	93369493	+	NM_001938.3	688	93346594	5'UTR	GGACC	22	0.571429	0.99996	YES	YES	NO
DR1	NC_000001.11	93345907	93369493	+	NM_001938.3	810	93346716	CDS	AGAGA	26	0.85	0.999932	NO	NO	hsa-let-7a-5p hsa-miR-7-5p hsa-miR-9-5p hsa-miR-7706 hsa-miR-130b-5p hsa-let-7a-5p hsa-miR-9-5p
DR1	NC_000001.11	93345907	93369493	+	NM_001938.3	812	93346718	CDS	AGACT	29	0.678571	0.999985	YES	YES	hsa-let-7a-5p hsa-miR-7-5p hsa-miR-7706 hsa-miR-130b-5p hsa-let-7a-5p
ATN1	NC_000012.12	6927959	6942321	+	NM_001940.4	4648	6942267	3' UTR	AAAAA	20	0.8	0.999927	NO	NO	NO
ATN1	NC_000012.12	6927959	6942321	+	NM_001940.4	4649	6942268	3' UTR	AAAAA	19	1	0.999982	NO	NO	NO
DSG2	NC_000018.10	31498177	31549008	+	NM_001943.5	4174	31547485	3' UTR	CCAGG	17	0.9375	0.999918	NO	NO	NO
DSG2	NC_000018.10	31498177	31549008	+	NM_001943.5	4371	31547682	3' UTR	AAAAA	16	0.857143	0.999918	NO	NO	NO
DSG2	NC_000018.10	31498177	31549008	+	NM_001943.5	4373	31547684	3' UTR	AAAAA	16	1	0.999917	NO	NO	NO
E2F4	NC_000016.10	67192155	67198918	+	NM_001950.4	1514	67198322	3' UTR	GGACT	22	0.666667	0.999928	YES	YES	NO
EEF2	NC_000019.10	3976056	3985463	-	NM_001961.4	2886	3976328	3' UTR	GGACT	943	0.819196	0.999992	YES	YES	NO
EIF4A2	NC_000003.12	186783577	186789897	+	NM_001967.4	1461	186789472	3' UTR	AGACT	344	0.671779	0.999993	YES	YES	NO
EEF2	NC_000019.10	3976056	3985463	-	NM_001961.4	2638	3976576	CDS	GGACA	855	0.0998825	0.999994	YES	YES	hsa-miR-873-5p hsa-miR-33b-3p hsa-miR-196a-5p hsa-miR-382-5p hsa-miR-196a-5p hsa-miR-26a-5p hsa-miR-196b-5p hsa-miR-26b-5p hsa-miR-26a-5p hsa-miR-196a-5p hsa-miR-196a-5p hsa-miR-26a-5p hsa-miR-196a-5p hsa-miR-196a-5p hsa-miR-196a-5p hsa-miR-196a-5p
EIF4E	NC_000004.12	98879276	98929133	-	NM_001968.5	766	98880937	3' UTR	GGACT	12	0.833333	0.999995	YES	YES	NO
FDPS	NC_000001.11	155308866	155320665	+	NM_002004.4	1150	155319918	CDS	CCAGA	32	0.933333	0.999989	NO	NO	NO
FDPS	NC_000001.11	155308866	155320665	+	NM_002004.4	1264	155320512	CDS	TTACA	22	0.8	0.999937	NO	NO	hsa-miR-106b-5p
FNTA	NC_000008.11	43056323	43085785	+	NM_002027.3	1212	43085330	3' UTR	GGACC	15	0.333333	0.999904	YES	YES	NO
KDSR	NC_000018.10	63327726	63367206	-	NM_002035.4	1150	63331719	3' UTR	GGACC	14	0.642857	0.999977	YES	YES	NO
KDSR	NC_000018.10	63327726	63367206	-	NM_002035.4	1168	63331701	3' UTR	ATAGA	20	0.95	0.999972	NO	NO	hsa-miR-20b-5p
KDSR	NC_000018.10	63327726	63367206	-	NM_002035.4	1170	63331699	3' UTR	AGACA	20	0.9	0.999968	YES	YES	hsa-miR-20b-5p
GOT2	NC_000016.10	58707131	58734316	-	NM_002080.4	1649	58707903	3' UTR	CAAGA	56	0.627451	0.999914	NO	NO	NO
GPC1	NC_000002.12	240435663	240468076	+	NM_002081.3	1970	240466327	3' UTR	TGACT	19	0.529412	0.999917	YES	YES	hsa-miR-19a-3p hsa-miR-19b-3p hsa-miR-34a-5p hsa-miR-182-5p hsa-miR-19b-3p hsa-miR-34a-5p hsa-miR-15b-3p hsa-miR-182-5p hsa-miR-19a-3p hsa-miR-19b-3p hsa-miR-34a-5p
GPC1	NC_000002.12	240435663	240468076	+	NM_002081.3	2567	240466924	3' UTR	GGACT	11	0.888889	0.999953	YES	YES	NO
GRSF1	NC_000004.12	70815783	70839890	-	NM_002092.4	1667	70820726	3' UTR	GGACT	102	0.73913	0.999997	YES	YES	hsa-miR-132-3p hsa-miR-139-5p
GPC1	NC_000002.12	240435663	240468076	+	NM_002081.3	825	240462434	CDS	GGACT	13	0.615385	0.999987	YES	YES	hsa-miR-455-3p
GRB2	NC_000017.11	75318076	75405678	-	NM_002086.5	1898	75319451	3' UTR	AAAAA	17	0.916667	0.99991	NO	NO	NO
H2AX	NC_000011.10	119093874	119095465	-	NM_002105.3	1473	119093993	3' UTR	GGACT	60	0.87931	0.999967	YES	YES	hsa-miR-423-3p hsa-miR-24-3p hsa-miR-423-3p hsa-miR-24-3p hsa-miR-423-3p hsa-miR-24-3p hsa-miR-423-3p hsa-miR-423-3p hsa-miR-24-3p hsa-miR-24-3p hsa-miR-423-3p hsa-miR-423-3p hsa-miR-140-3p hsa-miR-140-3p hsa-miR-24-3p hsa-miR-423-3p hsa-miR-24-3p hsa-miR-423-3p hsa-miR-21-5p hsa-miR-24-3p hsa-miR-24-3p hsa-miR-24-3p
H2AX	NC_000011.10	119093874	119095465	-	NM_002105.3	1559	119093907	3' UTR	GGACT	63	0.612903	0.999988	YES	YES	hsa-miR-181a-2-3p hsa-miR-24-3p
H2AX	NC_000011.10	119093874	119095465	-	NM_002105.3	605	119094861	3' UTR	AGACT	29	0.928571	0.99999	YES	YES	hsa-miR-92a-3p
HARS1	NC_000005.10	140673905	140691370	-	NM_002109.6	1629	140674224	3' UTR	GGACT	20	0.9	0.999924	YES	YES	hsa-miR-223-3p hsa-miR-142-3p
HLA-C	NC_000006.12	31268749	31272092	-	NM_002117.6	362	31271601	CDS	GGACG	48	0.809524	0.999947	NO	NO	NO
HMOX2	NC_000016.10	4476398	4510347	+	NM_002134.4	1058	4509732	CDS	GGACT	36	0.558824	0.999916	YES	NO	hsa-miR-484 hsa-miR-484
HMOX2	NC_000016.10	4476398	4510347	+	NM_002134.4	681	4508058	CDS	GGACC	35	0.575758	0.99996	YES	YES	NO
RBMX	NC_000023.11	136873461	136880725	-	NM_002139.4	1410	136874063	3' UTR	GGACT	81	0.807692	0.999976	YES	YES	NO
ID2	NC_000002.12	8682056	8684461	+	NM_002166.5	636	8683798	3' UTR	GGACC	92	0.755556	1	YES	YES	NO
ID2	NC_000002.12	8682056	8684461	+	NM_002166.5	710	8683872	3' UTR	GGACT	86	0.930233	1	YES	YES	hsa-miR-26a-5p hsa-miR-26b-5p hsa-miR-26a-5p hsa-miR-26b-5p hsa-miR-27a-3p hsa-miR-27b-3p hsa-miR-27a-3p hsa-miR-23a-3p hsa-miR-144-5p hsa-miR-26a-5p hsa-miR-26b-5p hsa-miR-27a-3p hsa-miR-27b-3p hsa-miR-455-3p hsa-miR-27a-3p hsa-miR-212-3p hsa-miR-23b-3p hsa-miR-26a-5p
INSL4	NC_000009.12	5231419	5235304	+	NM_002195.2	540	5233892	3' UTR	GGACT	21	0.9	0.999975	YES	YES	NO
ITGA3	NC_000017.11	50056110	50090481	+	NM_002204.4	3868	50089460	3' UTR	GGACC	26	0.8	0.999997	YES	YES	NO
ITGA3	NC_000017.11	50056110	50090481	+	NM_002204.4	3933	50089525	3' UTR	GGACT	23	1	0.999995	YES	YES	NO
ITGA3	NC_000017.11	50056110	50090481	+	NM_002204.4	4100	50089692	3' UTR	GGATT	32	0.461538	0.999964	NO	NO	NO
ITGA3	NC_000017.11	50056110	50090481	+	NM_002204.4	4104	50089696	3' UTR	TGACT	32	0.774194	0.999979	YES	NO	NO
ITGA3	NC_000017.11	50056110	50090481	+	NM_002204.4	4271	50089863	3' UTR	GGACC	34	0.242424	0.999948	YES	YES	hsa-miR-1285-3p
ITGA3	NC_000017.11	50056110	50090481	+	NM_002204.4	4326	50089918	3' UTR	AGACT	25	0.904762	0.99998	YES	YES	NO
ITGA3	NC_000017.11	50056110	50090481	+	NM_002204.4	4434	50090026	3' UTR	GGACC	35	0.28125	0.999976	YES	YES	NO
ITGA3	NC_000017.11	50056110	50090481	+	NM_002204.4	4873	50090465	3' UTR	AAACA	28	1	0.999911	YES	YES	hsa-miR-193a-3p hsa-miR-28-5p
ITGA5	NC_000012.12	54395261	54419266	-	NM_002205.5	3418	54396093	3' UTR	GGACC	15	0.866667	0.999985	YES	NO	hsa-miR-30a-5p hsa-miR-30a-5p hsa-miR-30e-5p hsa-miR-30a-5p hsa-miR-30e-5p hsa-miR-30a-5p hsa-miR-30b-5p hsa-miR-30d-5p hsa-miR-205-5p hsa-miR-30a-5p hsa-miR-30b-5p hsa-miR-30c-5p hsa-miR-30d-5p hsa-miR-30e-5p hsa-miR-30a-5p hsa-miR-30b-5p hsa-miR-30c-5p hsa-miR-30d-5p hsa-miR-30e-5p hsa-miR-30e-5p hsa-miR-30c-5p hsa-miR-30b-5p hsa-miR-30d-5p hsa-miR-30a-5p hsa-miR-30e-5p hsa-miR-30a-5p hsa-miR-3…
ITGA5	NC_000012.12	54395261	54419266	-	NM_002205.5	3582	54395929	3' UTR	GGACT	17	0.666667	0.999928	YES	NO	NO
ITGA5	NC_000012.12	54395261	54419266	-	NM_002205.5	4185	54395326	3' UTR	GGACT	20	0.777778	0.999987	YES	NO	hsa-miR-148b-5p hsa-miR-627-5p hsa-miR-148a-5p hsa-miR-1910-5p hsa-miR-148b-5p hsa-miR-1910-5p hsa-miR-302a-3p hsa-miR-148b-5p hsa-miR-3184-3p
ITGB1	NC_000010.11	32900318	32958230	-	NM_002211.4	1173	32922298	CDS	CAAAT	23	0.55	0.99992	NO	NO	hsa-miR-182-5p hsa-miR-450b-5p hsa-miR-182-5p hsa-miR-450a-5p
ITGB1	NC_000010.11	32900318	32958230	-	NM_002211.4	1504	32919936	CDS	TGAAA	28	1	0.999999	NO	NO	NO
ITGB1	NC_000010.11	32900318	32958230	-	NM_002211.4	1505	32919935	CDS	GAAAG	27	1	0.999985	NO	NO	NO
JUNB	NC_000019.10	12791486	12793315	+	NM_002229.3	1352	12792837	3' UTR	GGACA	112	0.834951	0.999974	YES	YES	hsa-miR-3184-5p hsa-miR-16-5p hsa-miR-320a-3p hsa-let-7a-5p
JUNB	NC_000019.10	12791486	12793315	+	NM_002229.3	1429	12792914	3' UTR	GGACC	126	0.516129	0.999994	YES	YES	NO
JUNB	NC_000019.10	12791486	12793315	+	NM_002229.3	1456	12792941	3' UTR	GGACT	126	0.944	1	YES	YES	hsa-miR-1910-5p hsa-miR-3652 hsa-miR-1910-5p
JUNB	NC_000019.10	12791486	12793315	+	NM_002229.3	1554	12793039	3' UTR	AGACT	138	0.895522	0.999999	YES	YES	NO
JUN	NC_000001.11	58780791	58784047	-	NM_002228.4	2251	58781797	3' UTR	GGACT	16	1	0.999982	YES	YES	hsa-miR-191-5p hsa-miR-106a-5p hsa-miR-191-5p hsa-miR-95-3p hsa-miR-106a-5p hsa-miR-191-5p hsa-miR-106a-5p hsa-miR-191-5p hsa-miR-191-5p
JUN	NC_000001.11	58780791	58784047	-	NM_002228.4	2348	58781700	3' UTR	AGAGA	15	0.846154	0.999967	NO	NO	hsa-miR-17-3p hsa-miR-139-5p hsa-miR-139-5p hsa-miR-139-5p hsa-miR-139-5p hsa-miR-139-5p hsa-miR-139-5p hsa-miR-17-3p hsa-miR-3184-3p hsa-miR-148b-5p hsa-miR-182-3p hsa-miR-139-5p hsa-miR-139-5p hsa-miR-139-5p hsa-miR-148a-3p hsa-miR-30d-5p hsa-miR-429 hsa-miR-200c-3p hsa-miR-200c-3p hsa-miR-200c-3p hsa-miR-139-5p
JUN	NC_000001.11	58780791	58784047	-	NM_002228.4	2350	58781698	3' UTR	AGACT	14	0.846154	0.999986	YES	YES	hsa-miR-17-3p hsa-miR-139-5p hsa-miR-139-5p hsa-miR-139-5p hsa-miR-139-5p hsa-miR-139-5p hsa-miR-139-5p hsa-miR-17-3p hsa-miR-3184-3p hsa-miR-148b-5p hsa-miR-182-3p hsa-miR-139-5p hsa-miR-139-5p hsa-miR-139-5p hsa-miR-148a-3p hsa-miR-30d-5p hsa-miR-200c-3p hsa-miR-200c-3p hsa-miR-200c-3p hsa-miR-139-5p
JUNB	NC_000019.10	12791486	12793315	+	NM_002229.3	1318	12792803	CDS	GGACA	90	0.44186	0.999935	YES	YES	hsa-miR-16-5p hsa-miR-16-5p hsa-let-7a-5p hsa-miR-16-5p hsa-miR-16-5p hsa-miR-24-3p hsa-miR-424-5p hsa-miR-16-5p hsa-miR-16-5p hsa-miR-16-5p hsa-miR-192-5p hsa-miR-320a-3p hsa-let-7a-5p
JUNB	NC_000019.10	12791486	12793315	+	NM_002229.3	258	12791743	5'UTR	GGACC	54	0.351852	0.999981	YES	YES	NO
JUNB	NC_000019.10	12791486	12793315	+	NM_002229.3	717	12792202	CDS	GGACG	63	0.607143	0.999983	NO	YES	hsa-miR-33a-5p hsa-miR-33b-5p hsa-miR-431-3p hsa-miR-19a-3p hsa-miR-107 hsa-miR-23a-3p
KPNB1	NC_000017.11	47649919	47685505	+	NM_002265.6	3238	47682685	3' UTR	AAAAA	63	0.684211	0.999971	NO	NO	NO
LAMC1	NC_000001.11	183023420	183145592	+	NM_002293.4	5018	183142681	CDS	GGACT	24	0.916667	0.999985	YES	YES	hsa-miR-433-3p
LGALS3	NC_000014.9	55129252	55145423	+	NM_002306.4	345	55138318	CDS	CCACC	23	1	0.999986	NO	NO	hsa-miR-183-5p hsa-miR-183-5p hsa-miR-183-5p
LOXL2	NC_000008.11	23296897	23404120	-	NM_002318.3	3195	23297423	3' UTR	AGACT	55	0.571429	0.999976	YES	YES	hsa-miR-29b-3p hsa-miR-29b-3p
LTBR	NC_000012.12	6384162	6391566	+	NM_002342.3	1688	6391120	3' UTR	GGACT	24	0.952381	0.999996	YES	NO	hsa-miR-30c-1-3p
LTBR	NC_000012.12	6384162	6391566	+	NM_002342.3	1768	6391200	3' UTR	GGACA	18	0.5	0.999906	YES	NO	NO
M6PR	NC_000012.12	8940361	8949645	-	NM_002355.4	2131	8940680	3' UTR	GGACT	19	0.842105	0.999991	YES	NO	hsa-miR-204-5p
M6PR	NC_000012.12	8940361	8949645	-	NM_002355.4	2271	8940540	3' UTR	GGACT	18	0.833333	0.999995	YES	NO	NO
SLC3A2	NC_000011.10	62856109	62888860	+	NM_002394.6	1808	62888447	CDS	GGACT	48	0.355556	0.999968	YES	YES	hsa-let-7d-5p hsa-let-7d-5p hsa-let-7d-5p hsa-let-7d-5p
SLC3A2	NC_000011.10	62856109	62888860	+	NM_002394.6	2071	62888710	3' UTR	GGACC	36	0.361111	0.999909	YES	YES	hsa-miR-196b-5p hsa-let-7d-5p hsa-miR-196a-5p hsa-miR-23b-5p hsa-let-7d-5p hsa-let-7d-5p hsa-let-7d-5p hsa-miR-196b-5p hsa-miR-196a-5p hsa-miR-196a-5p hsa-let-7d-5p hsa-let-7d-5p hsa-miR-196b-5p hsa-miR-196a-5p hsa-miR-196a-5p hsa-miR-197-5p hsa-miR-203b-5p hsa-miR-196b-5p
ME1	NC_000006.12	83210402	83431051	-	NM_002395.6	1671	83212069	CDS	AAAGA	27	0.916667	0.999923	NO	NO	NO
ME2	NC_000018.10	50879118	50954257	+	NM_002396.5	1005	50920523	CDS	GAAAG	17	0.9375	0.999942	NO	NO	NO
ME2	NC_000018.10	50879118	50954257	+	NM_002396.5	1002	50920520	CDS	TGAGA	17	0.9375	0.99996	NO	NO	hsa-miR-335-5p hsa-miR-335-5p
ME2	NC_000018.10	50879118	50954257	+	NM_002396.5	1004	50920522	CDS	AGAAA	17	0.9375	0.999986	NO	NO	NO
MGAT1	NC_000005.10	180784780	180802806	-	NM_002406.4	903	180792322	CDS	GGACT	7	1	0.999926	YES	YES	NO
MGAT2	NC_000014.9	49620799	49623481	+	NM_002408.4	1347	49622145	CDS	GGACC	20	0.578947	0.999991	YES	YES	hsa-miR-625-3p hsa-miR-625-3p hsa-miR-625-3p
MGAT2	NC_000014.9	49620799	49623481	+	NM_002408.4	1475	49622273	CDS	ACAGA	25	0.954545	0.999971	NO	NO	hsa-miR-106a-5p hsa-miR-106b-5p hsa-miR-17-5p hsa-miR-106b-5p hsa-miR-17-5p hsa-miR-106a-5p hsa-miR-106b-5p hsa-miR-17-5p hsa-miR-106b-5p hsa-miR-17-5p hsa-miR-210-3p hsa-miR-106b-5p hsa-miR-17-5p hsa-miR-20a-5p hsa-miR-210-3p hsa-miR-93-5p hsa-miR-106b-5p hsa-miR-17-5p
MGAT2	NC_000014.9	49620799	49623481	+	NM_002408.4	1477	49622275	CDS	AGACA	25	0.833333	0.999994	YES	YES	hsa-miR-106a-5p hsa-miR-106b-5p hsa-miR-17-5p hsa-miR-106b-5p hsa-miR-17-5p hsa-miR-106a-5p hsa-miR-106b-5p hsa-miR-17-5p hsa-miR-106b-5p hsa-miR-17-5p hsa-miR-106b-5p hsa-miR-17-5p hsa-miR-20a-5p hsa-miR-93-5p hsa-miR-106b-5p hsa-miR-17-5p
MGAT2	NC_000014.9	49620799	49623481	+	NM_002408.4	1510	49622308	CDS	GGACT	21	1	0.999993	YES	YES	NO
MGAT2	NC_000014.9	49620799	49623481	+	NM_002408.4	1515	49622313	CDS	GGACT	23	0.95	0.999997	YES	YES	NO
MGAT2	NC_000014.9	49620799	49623481	+	NM_002408.4	1598	49622396	CDS	GGAGA	25	1	0.999959	NO	NO	hsa-miR-132-3p hsa-miR-338-3p hsa-miR-766-3p
MGAT2	NC_000014.9	49620799	49623481	+	NM_002408.4	1600	49622398	CDS	AGACT	23	0.913043	0.999997	YES	YES	hsa-miR-132-3p hsa-miR-766-3p
MGAT2	NC_000014.9	49620799	49623481	+	NM_002408.4	877	49621675	CDS	GGACT	20	0.894737	0.99999	YES	YES	hsa-miR-16-5p
MAP3K11	NC_000011.10	65597757	65614221	-	NM_002419.4	2888	65598412	CDS	GGACT	10	0.9	0.999975	YES	YES	NO
MAP3K11	NC_000011.10	65597757	65614221	-	NM_002419.4	2945	65598355	CDS	GGACT	12	1	0.999997	YES	YES	NO
MTAP	NC_000009.12	21802636	21867081	+	NM_002451.4	1126	21862175	3' UTR	AGACT	18	0.666667	0.999914	YES	YES	NO
MTAP	NC_000009.12	21802636	21867081	+	NM_002451.4	1323	21862372	3' UTR	GGACT	15	0.692308	0.999992	YES	YES	NO
MTX1	NC_000001.11	155208695	155213823	+	NM_002455.5	1532	155213719	3' UTR	AGACT	88	0.567901	0.999992	YES	NO	NO
MVD	NC_000016.10	88651940	88663091	-	NM_002461.3	1296	88652443	3' UTR	GGACT	17	0.588235	0.999982	YES	YES	NO
MYBL2	NC_000020.11	43667114	43716482	+	NM_002466.4	1909	43713021	CDS	CAAGA	73	0.875	0.999924	NO	NO	hsa-miR-378a-3p
MYBL2	NC_000020.11	43667114	43716482	+	NM_002466.4	2110	43715249	CDS	CCAGA	45	0.975	0.999948	NO	NO	NO
MYC	NC_000008.11	127736231	127742951	+	NM_002467.6	1661	127740891	CDS	GGACT	51	0.704545	0.999975	YES	YES	hsa-miR-196a-3p hsa-miR-194-5p hsa-miR-194-5p hsa-let-7a-5p
MYC	NC_000008.11	127736231	127742951	+	NM_002467.6	1841	127741071	3' UTR	AGACT	61	0.58	0.999933	YES	YES	hsa-miR-5100 hsa-miR-5100 hsa-miR-5100 hsa-miR-30a-3p hsa-miR-30e-3p hsa-miR-30a-3p hsa-miR-516a-5p hsa-miR-30d-3p hsa-miR-30a-3p hsa-miR-30d-3p hsa-miR-30e-3p hsa-miR-516a-5p hsa-miR-300 hsa-miR-125a-3p hsa-miR-4677-3p hsa-miR-3159 hsa-miR-34c-5p hsa-miR-148b-5p hsa-miR-3168 hsa-miR-940 hsa-miR-1294 hsa-let-7b-3p hsa-miR-1248 hsa-miR-92a-3p hsa-miR-455-3p hsa-miR-24-3p hsa-let-7a-5p hsa-miR-135b…
MYC	NC_000008.11	127736231	127742951	+	NM_002467.6	1881	127741111	3' UTR	GGACT	55	0.927273	0.999999	YES	YES	hsa-miR-17-5p hsa-miR-20a-5p hsa-miR-20b-5p hsa-miR-93-5p hsa-miR-20a-5p hsa-miR-93-5p hsa-miR-17-5p hsa-miR-20a-5p hsa-miR-93-5p hsa-miR-17-5p hsa-miR-20a-5p hsa-miR-93-5p hsa-miR-17-5p hsa-miR-20a-5p hsa-miR-93-5p hsa-miR-148a-5p hsa-miR-148a-5p hsa-miR-300 hsa-miR-125a-3p hsa-miR-4677-3p hsa-miR-3159 hsa-miR-34c-5p hsa-miR-148b-5p hsa-miR-940 hsa-miR-1294 hsa-let-7b-3p hsa-miR-1248 hsa-miR-92a…
MYH9	NC_000022.11	36281280	36387967	-	NM_002473.6	6661	36282070	3' UTR	GGAGT	21	0.933333	0.999985	NO	NO	hsa-miR-15b-3p hsa-miR-15b-3p
NDUFA6	NC_000022.11	42085526	42090772	-	NM_002490.6	549	42086049	3' UTR	GGACC	17	0.4375	0.999979	YES	NO	hsa-miR-4521
NEK2	NC_000001.11	211662772	211675621	-	NM_002497.4	1536	211663370	3' UTR	AGACT	38	0.857143	0.999991	YES	YES	NO
NME3	NC_000016.10	1770320	1771543	-	NM_002513.3	291	1770991	CDS	GTATG	24	0.958333	0.99995	NO	NO	NO
NPTX1	NC_000017.11	80466834	80476607	-	NM_002522.4	1431	80470842	CDS	GGACC	25	0.36	0.99997	YES	YES	NO
NPTX1	NC_000017.11	80466834	80476607	-	NM_002522.4	1679	80470594	3' UTR	GGACT	27	0.846154	0.999997	YES	YES	NO
NPTX1	NC_000017.11	80466834	80476607	-	NM_002522.4	3471	80468802	3' UTR	GGACT	10	0.6	0.999937	YES	YES	hsa-miR-34a-5p
NPTX1	NC_000017.11	80466834	80476607	-	NM_002522.4	5038	80467235	3' UTR	GGACT	37	0.8	0.999982	YES	YES	hsa-miR-30a-3p hsa-miR-30e-3p
NPTX1	NC_000017.11	80466834	80476607	-	NM_002522.4	5432	80466841	3' UTR	GGAGA	30	0.458333	0.999915	NO	NO	NO
NTHL1	NC_000016.10	2039820	2047834	-	NM_002528.7	827	2040023	CDS	GGACT	27	0.592593	0.999978	YES	YES	hsa-miR-561-5p
ODC1	NC_000002.12	10439968	10448327	-	NM_002539.3	1791	10440653	3' UTR	TAATT	33	0.928571	0.999982	NO	NO	hsa-miR-34a-5p hsa-miR-199a-3p hsa-miR-199b-3p hsa-miR-34a-5p hsa-miR-449a hsa-miR-449b-5p hsa-miR-34a-5p hsa-miR-34a-5p hsa-miR-449a hsa-miR-199a-3p hsa-miR-199b-3p hsa-miR-34a-5p hsa-miR-449b-5p hsa-miR-34a-5p hsa-miR-34a-5p hsa-miR-34a-5p hsa-miR-199a-3p hsa-miR-199b-3p hsa-miR-34a-5p hsa-miR-449a hsa-miR-34a-5p hsa-miR-34a-5p hsa-miR-34a-5p
TNFRSF11B	NC_000008.11	118923557	118951885	-	NM_002546.4	1428	118924216	3' UTR	GGACT	22	0.714286	0.999951	YES	YES	NO
OSBP	NC_000011.10	59574398	59615774	-	NM_002556.3	3332	59575779	3' UTR	AGACT	14	0.785714	0.99992	YES	YES	hsa-miR-5001-5p hsa-miR-34a-5p hsa-miR-34a-5p hsa-miR-20a-5p
PDCD2	NC_000006.12	170575295	170584637	-	NM_002598.4	1209	170577441	3' UTR	AGATT	17	1	0.999999	NO	NO	NO
PDCD2	NC_000006.12	170575295	170584637	-	NM_002598.4	605	170583166	CDS	CCAGA	16	1	0.999985	NO	NO	hsa-miR-382-5p
PDK4	NC_000007.14	95583499	95596516	-	NM_002612.4	2631	95584469	3' UTR	AGAGA	32	0.96	0.999985	NO	NO	hsa-miR-139-5p
PDK4	NC_000007.14	95583499	95596516	-	NM_002612.4	2633	95584467	3' UTR	AGATA	30	0.9	0.999981	NO	NO	NO
PFDN1	NC_000005.10	140245035	140303101	-	NM_002622.5	1074	140245297	3' UTR	AGACT	38	0.777778	0.999984	YES	YES	NO
PFKP	NC_000010.11	3067548	3136802	+	NM_002627.5	2440	3136616	3' UTR	GGACT	25	0.473684	0.999984	YES	YES	NO
SLC25A3	NC_000012.12	98593686	98606367	+	NM_002635.4	1166	98601549	3' UTR	GGACT	499	0.618449	0.999956	YES	NO	hsa-miR-23a-3p hsa-miR-23a-3p hsa-miR-376a-5p hsa-miR-23a-3p hsa-miR-23a-3p hsa-miR-23a-3p hsa-miR-23a-3p hsa-miR-23a-3p
PGM1	NC_000001.11	63593411	63660245	+	NM_002633.3	1960	63659868	3' UTR	GGACC	41	0.625	0.99998	YES	YES	NO
SERPINB5	NC_000018.10	63476958	63505085	+	NM_002639.5	1194	63503693	CDS	TTATT	37	1	0.999991	NO	NO	NO
SERPINB5	NC_000018.10	63476958	63505085	+	NM_002639.5	870	63503369	CDS	GGACT	31	0.466667	0.999989	YES	NO	hsa-miR-324-3p
PIGC	NC_000001.11	172441457	172444069	-	NM_002642.4	264	172442672	5'UTR	GGACT	7	1	0.999945	YES	YES	NO
PITX1	NC_000005.10	135027734	135034228	-	NM_002653.5	1174	135028897	CDS	GGACA	42	0.756098	0.999935	YES	YES	hsa-miR-153-3p hsa-miR-92b-3p hsa-miR-92a-3p hsa-miR-25-3p hsa-miR-519e-3p hsa-miR-363-3p hsa-miR-519e-3p hsa-miR-92b-3p hsa-miR-363-3p hsa-miR-32-5p hsa-miR-25-3p hsa-miR-92a-3p hsa-miR-25-3p hsa-miR-597-5p hsa-miR-92b-3p hsa-miR-92a-3p hsa-miR-92b-3p hsa-miR-25-3p hsa-miR-32-5p hsa-miR-92a-3p hsa-miR-32-5p hsa-miR-363-3p hsa-miR-92a-3p hsa-miR-25-3p hsa-miR-92b-3p
PITX1	NC_000005.10	135027734	135034228	-	NM_002653.5	1473	135028598	3' UTR	GGACC	31	0.413793	0.999967	YES	YES	hsa-miR-128-1-5p
PITX1	NC_000005.10	135027734	135034228	-	NM_002653.5	1494	135028577	3' UTR	AAAGA	46	0.956522	0.999997	NO	NO	NO
PITX1	NC_000005.10	135027734	135034228	-	NM_002653.5	1496	135028575	3' UTR	AGACA	41	0.95122	0.999999	YES	YES	NO
PITX1	NC_000005.10	135027734	135034228	-	NM_002653.5	1723	135028348	3' UTR	GGACT	46	0.785714	0.999989	YES	YES	NO
PITX1	NC_000005.10	135027734	135034228	-	NM_002653.5	1744	135028327	3' UTR	GGACT	24	0.869565	0.999966	YES	YES	hsa-miR-181a-5p
PITX1	NC_000005.10	135027734	135034228	-	NM_002653.5	1764	135028307	3' UTR	GGACT	16	0.846154	0.999993	YES	YES	NO
PKM	NC_000015.10	72199029	72231190	-	NM_002654.6	1802	72199532	3' UTR	GGACA	656	0.0811232	0.999907	YES	YES	hsa-miR-331-3p hsa-miR-200a-5p hsa-miR-331-3p hsa-miR-4664-3p hsa-miR-9-5p
PLAUR	NC_000019.10	43648579	43670169	-	NM_002659.4	1133	43648814	3' UTR	AGACT	21	0.8	0.999994	YES	YES	NO
PNN	NC_000014.9	39175254	39183220	+	NM_002687.4	2313	39181996	3' UTR	AGACT	26	0.727273	0.999988	YES	YES	hsa-miR-132-3p hsa-miR-212-3p
PPP1CA	NC_000011.10	67398183	67401858	-	NM_002708.4	1416	67398188	3' UTR	GGATT	10	0.875	0.999918	NO	NO	NO
PPP1CC	NC_000012.12	110719680	110742891	-	NM_002710.4	1184	110721048	3' UTR	GGACT	72	0.2	0.999926	YES	NO	hsa-miR-148b-5p hsa-miR-550a-3p hsa-miR-224-5p hsa-miR-148b-5p hsa-miR-148b-5p hsa-miR-378a-5p hsa-miR-378a-5p hsa-miR-378a-5p hsa-miR-6882-5p
PPP2CA	NC_000005.10	134194332	134226073	-	NM_002715.4	1267	134197647	3' UTR	GGACC	62	0.677419	0.999994	YES	YES	hsa-miR-182-5p hsa-miR-34a-5p hsa-miR-182-5p hsa-miR-34a-5p hsa-miR-133a-3p hsa-miR-34a-5p hsa-miR-182-5p hsa-miR-34a-5p hsa-miR-34a-5p hsa-miR-182-5p hsa-miR-27a-3p hsa-miR-27b-3p
PPP2CA	NC_000005.10	134194332	134226073	-	NM_002715.4	1427	134197487	3' UTR	AGACT	94	0.75	0.999928	YES	YES	hsa-miR-21-5p hsa-miR-17-3p
PPP2R2A	NC_000008.11	26291508	26372680	+	NM_002717.4	1919	26370676	3' UTR	GGACT	8	1	0.999942	YES	YES	hsa-miR-26a-5p hsa-miR-33b-5p hsa-miR-26a-5p
PPP2R2A	NC_000008.11	26291508	26372680	+	NM_002717.4	1929	26370686	3' UTR	GGACT	14	0.923077	0.999987	YES	YES	hsa-miR-26a-5p hsa-miR-26a-5p hsa-miR-132-3p hsa-miR-653-5p
MAP2K6	NC_000017.11	69414697	69553865	+	NM_002758.4	1304	69541764	3' UTR	GGACT	28	0.5	0.999948	YES	YES	NO
CHMP1A	NC_000016.10	89644435	89657708	-	NM_002768.5	988	89645789	3' UTR	GGACT	11	1	0.999968	YES	YES	NO
HTRA1	NC_000010.11	122461553	122514907	+	NM_002775.5	1581	122514397	3' UTR	AGACT	51	0.652174	0.999992	YES	YES	hsa-miR-193a-5p hsa-miR-193a-5p
HTRA1	NC_000010.11	122461553	122514907	+	NM_002775.5	1606	122514422	3' UTR	GGACT	52	0.745098	0.999976	YES	YES	NO
HTRA1	NC_000010.11	122461553	122514907	+	NM_002775.5	1917	122514733	3' UTR	GGACT	47	0.619048	0.999949	YES	YES	NO
HTRA1	NC_000010.11	122461553	122514907	+	NM_002775.5	1972	122514788	3' UTR	AGACC	53	0.313725	0.999961	YES	YES	NO
HTRA1	NC_000010.11	122461553	122514907	+	NM_002775.5	840	122489589	CDS	TGAGA	24	0.954545	0.999952	NO	NO	NO
PSMB3	NC_000017.11	38752741	38764225	+	NM_002795.4	68	38752808	5'UTR	GGATC	75	0.985507	0.999954	NO	NO	NO
PSMB10	NC_000016.10	67934506	67936850	-	NM_002801.4	315	67936243	CDS	AGAAG	20	0.722222	0.999931	NO	NO	NO
PSMC1	NC_000014.9	90256553	90275429	+	NM_002802.3	246	90263364	CDS	AGAAT	50	0.208333	0.999911	NO	NO	NO
PSMC1	NC_000014.9	90256553	90275429	+	NM_002802.3	247	90263365	CDS	GAATT	51	0.22449	0.999943	NO	NO	NO
PSMC5	NC_000017.11	63827431	63832019	+	NM_002805.6	484	63830373	CDS	AGAAA	80	0.847222	0.999977	NO	NO	NO
PSMD7	NC_000016.10	74296814	74306288	+	NM_002811.5	1246	74305903	3' UTR	AGACT	128	0.626087	0.999983	YES	YES	NO
PSMD7	NC_000016.10	74296814	74306288	+	NM_002811.5	1414	74306071	3' UTR	AGACT	116	0.808081	0.999909	YES	YES	NO
PSMD7	NC_000016.10	74296814	74306288	+	NM_002811.5	351	74301135	CDS	AGAAA	157	0.864865	0.99997	NO	NO	NO
PSMD8	NC_000019.10	38374571	38383824	+	NM_002812.5	1163	38383469	3' UTR	GGACT	134	0.532258	0.999906	YES	YES	NO
PSMD8	NC_000019.10	38374571	38383824	+	NM_002812.5	858	38382140	CDS	CGAGA	210	0.970149	0.999983	NO	NO	hsa-miR-942-5p
PSMD8	NC_000019.10	38374571	38383824	+	NM_002812.5	860	38382142	CDS	AGAAG	211	0.995098	0.99998	NO	NO	hsa-miR-942-5p
PSME2	NC_000014.9	24143365	24146610	-	NM_002818.3	325	24145122	CDS	GAAAG	162	0.510345	0.999953	NO	NO	NO
PSMD12	NC_000017.11	67337916	67366577	-	NM_002816.5	1480	67340792	3' UTR	AGACT	25	0.4	0.999928	YES	YES	hsa-miR-132-3p hsa-miR-194-5p hsa-miR-212-3p hsa-miR-34a-5p hsa-miR-374a-5p hsa-miR-374b-5p hsa-miR-212-3p hsa-miR-34a-5p hsa-miR-374a-5p
PSMD13	NC_000011.10	236976	252984	+	NM_002817.4	1333	252728	3' UTR	AGACT	55	0.54717	0.999932	YES	YES	NO
PTBP1	NC_000019.10	797452	812312	+	NM_002819.5	2105	811211	3' UTR	GGACC	18	0.294118	0.999912	YES	YES	NO
QSOX1	NC_000001.11	180154869	180204030	+	NM_002826.5	1667	180196421	CDS	GGACT	12	0.833333	0.999984	YES	YES	hsa-miR-196a-5p
QSOX1	NC_000001.11	180154869	180204030	+	NM_002826.5	1775	180196529	CDS	GGACC	14	0.571429	0.999952	YES	YES	NO
QSOX1	NC_000001.11	180154869	180204030	+	NM_002826.5	1839	180196593	CDS	GGACC	12	0.416667	0.999918	YES	YES	NO
QSOX1	NC_000001.11	180154869	180204030	+	NM_002826.5	1976	180196730	CDS	AGACA	16	0.5	0.999964	YES	YES	NO
QSOX1	NC_000001.11	180154869	180204030	+	NM_002826.5	2165	180196919	CDS	GGACA	15	0.571429	0.999954	YES	YES	NO
RAD1	NC_000005.10	34905260	34915504	-	NM_002853.4	589	34911689	CDS	GGACT	36	0.333333	0.999974	YES	NO	hsa-miR-17-5p hsa-miR-20a-5p hsa-miR-20b-5p hsa-miR-93-5p
NECTIN2	NC_000019.10	44846297	44878938	+	NM_002856.3	1754	44878705	3' UTR	GGACT	18	0.888889	0.999996	YES	YES	NO
NECTIN2	NC_000019.10	44846297	44878938	+	NM_002856.3	1807	44878758	3' UTR	GGACT	22	0.714286	0.999992	YES	YES	NO
NECTIN2	NC_000019.10	44846297	44878938	+	NM_002856.3	1916	44878867	3' UTR	AGACT	11	0.9	0.999948	YES	YES	hsa-miR-1323 hsa-miR-330-5p hsa-miR-224-5p hsa-miR-3184-3p
RAD23B	NC_000009.12	107283279	107332189	+	NM_002874.5	1587	107329662	3' UTR	GGACT	15	0.642857	0.999907	YES	YES	NO
RANBP1	NC_000022.11	20117505	20127355	+	NM_002882.4	1036	20127337	3' UTR	AAAAC	32	0.806452	0.999993	NO	NO	hsa-miR-17-5p
RCN1	NC_000011.10	32091074	32105722	+	NM_002901.4	1123	32104476	3' UTR	AGACA	106	0.601942	0.999932	YES	YES	NO
RCN1	NC_000011.10	32091074	32105722	+	NM_002901.4	1142	32104495	3' UTR	GCAGA	111	0.950495	0.999909	NO	NO	hsa-miR-34a-5p hsa-miR-34a-5p hsa-miR-34a-5p hsa-miR-34a-5p hsa-miR-183-5p hsa-miR-183-5p hsa-miR-34a-5p hsa-miR-34a-5p hsa-miR-34a-5p hsa-miR-34a-5p hsa-miR-34a-5p hsa-miR-34a-5p hsa-miR-34a-5p hsa-miR-34a-5p
RCN1	NC_000011.10	32091074	32105722	+	NM_002901.4	1144	32104497	3' UTR	AGACT	101	0.623762	0.999996	YES	YES	hsa-miR-34a-5p hsa-miR-34a-5p hsa-miR-34a-5p hsa-miR-34a-5p hsa-miR-183-5p hsa-miR-183-5p hsa-miR-34a-5p hsa-miR-34a-5p hsa-miR-34a-5p hsa-miR-34a-5p hsa-miR-34a-5p hsa-miR-34a-5p hsa-miR-34a-5p hsa-miR-34a-5p
RCN1	NC_000011.10	32091074	32105722	+	NM_002901.4	2096	32105449	3' UTR	GGACT	143	0.642336	0.999946	YES	YES	NO
RCN2	NC_000015.10	76931749	76954393	+	NM_002902.3	971	76949146	CDS	GGACT	101	0.183673	0.999933	YES	YES	NO
RBM4	NC_000011.10	66638703	66646468	+	NM_002896.4	614	66643589	CDS	GCAGA	40	0.973684	0.999975	NO	NO	hsa-miR-26a-5p hsa-miR-26b-5p hsa-miR-182-5p hsa-miR-26b-5p hsa-miR-182-5p hsa-miR-26a-5p hsa-miR-3934-5p hsa-miR-26a-5p hsa-miR-26b-5p hsa-miR-26a-5p hsa-miR-26a-5p hsa-miR-26b-5p hsa-miR-26a-5p hsa-miR-26b-5p hsa-miR-26a-5p hsa-miR-26b-5p hsa-miR-26a-5p hsa-miR-182-5p hsa-miR-26b-5p hsa-miR-26b-5p hsa-miR-26a-5p hsa-miR-26a-5p hsa-miR-26b-5p hsa-miR-26a-5p hsa-miR-26b-5p hsa-miR-26a-5p hsa-miR-…
RBM4	NC_000011.10	66638703	66646468	+	NM_002896.4	616	66643591	CDS	AGACT	37	0.65625	0.999994	YES	YES	hsa-miR-26a-5p hsa-miR-26b-5p hsa-miR-182-5p hsa-miR-26b-5p hsa-miR-182-5p hsa-miR-26a-5p hsa-miR-3934-5p hsa-miR-26a-5p hsa-miR-26b-5p hsa-miR-26a-5p hsa-miR-26a-5p hsa-miR-26b-5p hsa-miR-26a-5p hsa-miR-26b-5p hsa-miR-26a-5p hsa-miR-26b-5p hsa-miR-26a-5p hsa-miR-182-5p hsa-miR-26b-5p hsa-miR-26b-5p hsa-miR-26a-5p hsa-miR-26a-5p hsa-miR-26b-5p hsa-miR-26a-5p hsa-miR-26b-5p hsa-miR-26a-5p hsa-miR-…
RBM4	NC_000011.10	66638703	66646468	+	NM_002896.4	884	66643859	CDS	AGACA	44	0.268293	0.999975	YES	YES	hsa-miR-194-5p
RCN1	NC_000011.10	32091074	32105722	+	NM_002901.4	1286	32104639	3' UTR	GGACA	85	0.821429	0.999998	YES	YES	NO
RING1	NC_000006.12	33208500	33212716	+	NM_002931.4	1187	33211867	CDS	GGACC	31	0.413793	0.999989	YES	NO	NO
RING1	NC_000006.12	33208500	33212716	+	NM_002931.4	1549	33212524	3' UTR	GGACA	39	0.558824	0.999973	YES	YES	hsa-miR-320a-3p hsa-miR-320c
RNF4	NC_000004.12	2469106	2515857	+	NM_002938.5	975	2513911	3' UTR	AGACT	10	0.888889	0.999905	YES	YES	hsa-miR-132-3p hsa-miR-132-3p
RPA1	NC_000017.11	1830005	1900082	+	NM_002945.5	2057	1897292	3' UTR	GGACT	37	0.864865	0.999996	YES	YES	NO
RPA1	NC_000017.11	1830005	1900082	+	NM_002945.5	2545	1897780	3' UTR	AGACT	43	0.425	0.999948	YES	YES	hsa-miR-24-3p hsa-miR-345-5p hsa-miR-24-3p hsa-miR-24-3p hsa-miR-345-5p hsa-miR-423-3p
RPS2	NC_000016.10	1962058	1964826	-	NM_002952.4	285	1964281	CDS	CTATT	5977	0.993935	1	NO	NO	hsa-miR-1296-3p hsa-miR-1296-3p hsa-let-7e-5p hsa-miR-1296-3p hsa-miR-320a-3p hsa-miR-200c-3p
RPS6KA1	NC_000001.11	26529761	26575025	+	NM_002953.4	2549	26574382	3' UTR	GGACT	14	1	0.999984	YES	YES	NO
RPS6KA1	NC_000001.11	26529761	26575025	+	NM_002953.4	2722	26574555	3' UTR	TGAGA	17	0.823529	0.99999	NO	NO	NO
RPS6KA1	NC_000001.11	26529761	26575025	+	NM_002953.4	2724	26574557	3' UTR	AGACT	19	0.789474	0.999996	YES	YES	NO
RPS27A	NC_000002.12	55232688	55235853	+	NM_002954.6	529	55235597	3' UTR	AGACA	1478	0.0503059	0.999998	YES	YES	NO
RPS27A	NC_000002.12	55232688	55235853	+	NM_002954.6	531	55235599	3' UTR	ACATG	1341	0.0358476	0.999936	NO	NO	NO
SDC4	NC_000020.11	45325288	45348424	-	NM_002999.4	663	45327238	3' UTR	GGACT	8	0.857143	0.99993	YES	YES	hsa-miR-106b-5p hsa-miR-20a-5p hsa-miR-3184-3p
SET	NC_000009.12	128689222	128696396	+	NM_003011.4	686	128692712	CDS	CCAGA	25	0.909091	0.999936	NO	NO	hsa-miR-181a-5p hsa-miR-182-5p hsa-miR-9-5p hsa-miR-9-5p hsa-miR-182-5p hsa-miR-181a-5p hsa-miR-9-5p hsa-miR-182-5p hsa-miR-182-5p hsa-miR-423-3p
SLC16A1	NC_000001.11	112911847	112956196	-	NM_003051.4	1034	112917578	CDS	GGACT	7	0.857143	0.99995	YES	YES	hsa-miR-19a-3p hsa-miR-19b-3p hsa-miR-19a-3p hsa-miR-19a-3p hsa-miR-19b-3p hsa-miR-19a-3p hsa-miR-19b-3p hsa-miR-19a-3p hsa-miR-19b-3p hsa-miR-19a-3p hsa-miR-19b-3p
SLC16A1	NC_000001.11	112911847	112956196	-	NM_003051.4	1812	112913788	3' UTR	AGACA	13	0.583333	0.999955	YES	YES	hsa-miR-377-3p hsa-miR-376a-3p
SNAI2	NC_000008.11	48917598	48921429	-	NM_003068.5	1233	48918545	3' UTR	AGACA	15	0.642857	0.999934	YES	YES	hsa-miR-18a-5p hsa-miR-506-3p hsa-miR-506-3p
FSCN1	NC_000007.14	5592816	5606655	+	NM_003088.4	1767	5605638	3' UTR	GGACT	82	0.628205	0.999993	YES	YES	hsa-miR-145-5p
SNTA1	NC_000020.11	33407957	33443763	-	NM_003098.3	1850	33408318	3' UTR	GGACT	15	0.538462	0.999972	YES	YES	NO
SPG7	NC_000016.10	89508403	89557766	+	NM_003119.4	2969	89557659	3' UTR	GGACT	11	0.7	0.999953	YES	YES	NO
SPR	NC_000002.12	72887408	72892158	+	NM_003124.5	795	72891521	CDS	GGACT	36	0.942857	0.999996	YES	YES	NO
SQLE	NC_000008.11	124998505	125022283	+	NM_003129.4	906	124999410	CDS	GGACT	21	1	0.999987	YES	YES	NO
SQLE	NC_000008.11	124998505	125022283	+	NM_003129.4	955	124999459	CDS	GGACT	18	0.941176	0.999993	YES	YES	hsa-miR-27a-3p
SRM	NC_000001.11	11054589	11060018	-	NM_003132.3	1143	11054706	3' UTR	GGACT	96	0.265957	0.999906	YES	YES	hsa-miR-132-3p
SRP19	NC_000005.10	112861287	112869788	+	NM_003135.3	565	112867577	3' UTR	AGACA	73	0.275362	0.99995	YES	YES	hsa-miR-181b-5p
SRP19	NC_000005.10	112861287	112869788	+	NM_003135.3	788	112867800	3' UTR	GGACT	60	0.933333	0.999999	YES	YES	hsa-miR-5701 hsa-miR-92b-3p
SRPRA	NC_000011.10	126262938	126268895	-	NM_003139.4	2396	126263528	3' UTR	AGACT	21	0.578947	0.999921	YES	YES	NO
TRIM21	NC_000011.10	4384897	4393702	-	NM_003141.4	1561	4385271	3' UTR	GGACA	15	0.666667	0.999919	YES	YES	NO
TRIM21	NC_000011.10	4384897	4393702	-	NM_003141.4	1813	4385019	3' UTR	GGACT	11	0.909091	0.999962	YES	YES	NO
SSB	NC_000002.12	169798871	169812064	+	NM_003142.5	1072	169811004	CDS	ATAGA	48	0.844444	0.999943	NO	NO	hsa-miR-942-5p
SSR2	NC_000001.11	156009048	156020951	-	NM_003145.4	952	156009204	3' UTR	AGACT	296	0.713781	0.999995	YES	YES	hsa-miR-196a-5p hsa-miR-34a-5p hsa-miR-196a-5p hsa-miR-196b-5p hsa-miR-196a-5p hsa-let-7i-5p hsa-let-7i-5p
STX5	NC_000011.10	62806860	62832051	-	NM_003164.5	822	62824540	CDS	GCAGA	27	0.95	0.999971	NO	NO	NO
SUPT4H1	NC_000017.11	58345178	58352201	-	NM_003168.3	585	58346081	3' UTR	GGACT	63	0.83871	0.999997	YES	YES	NO
SUPT4H1	NC_000017.11	58345178	58352201	-	NM_003168.3	701	58345965	3' UTR	GGACT	58	0.410714	0.999908	YES	YES	hsa-miR-148b-5p hsa-miR-221-5p
SUPT4H1	NC_000017.11	58345178	58352201	-	NM_003168.3	737	58345929	3' UTR	AGAAA	34	0.741935	0.999946	NO	NO	NO
TBCC	NC_000006.12	42744498	42746103	-	NM_003192.3	1067	42745037	CDS	GGACT	15	1	0.999928	YES	YES	NO
TBCC	NC_000006.12	42744498	42746103	-	NM_003192.3	681	42745423	CDS	AGACT	15	0.928571	0.999952	YES	YES	hsa-let-7f-2-3p hsa-let-7g-3p hsa-miR-485-3p hsa-miR-5581-3p hsa-let-7f-2-3p hsa-let-7f-2-3p hsa-miR-23a-3p hsa-miR-23a-3p hsa-miR-23a-3p hsa-miR-23a-3p
TBCE	NC_000001.11	235367427	235452443	+	NM_003193.5	864	235435762	CDS	CCAGA	14	1	0.99996	NO	NO	NO
ELOA	NC_000001.11	23743471	23762059	+	NM_003198.3	1379	23751951	CDS	GGACT	9	1	0.99997	YES	YES	hsa-miR-378a-3p hsa-miR-378d hsa-miR-26a-5p hsa-miR-26b-5p hsa-miR-26a-5p
THOP1	NC_000019.10	2785503	2815807	+	NM_003249.5	2330	2813376	3' UTR	GGACT	40	0.394737	0.999977	YES	YES	hsa-miR-28-3p hsa-miR-28-3p
TIAL1	NC_000010.11	119573465	119596964	-	NM_003252.4	1634	119575658	3' UTR	GGACT	14	0.928571	0.999993	YES	YES	hsa-miR-941 hsa-miR-484 hsa-miR-642a-5p hsa-miR-642a-5p
TIMP2	NC_000017.11	78852977	78925387	-	NM_003255.5	1366	78855263	3' UTR	AGACT	30	0.571429	0.999984	YES	YES	NO
TIMP2	NC_000017.11	78852977	78925387	-	NM_003255.5	1853	78854776	3' UTR	GGATT	48	0.615385	0.999936	NO	NO	hsa-miR-19a-3p hsa-miR-19b-3p hsa-miR-19a-3p hsa-miR-19b-3p hsa-miR-19b-3p hsa-miR-19a-3p hsa-miR-19b-3p hsa-miR-19a-3p hsa-miR-19b-3p
TIMP2	NC_000017.11	78852977	78925387	-	NM_003255.5	1986	78854643	3' UTR	AGACT	42	0.552632	0.999958	YES	YES	hsa-miR-34a-5p hsa-miR-34a-5p hsa-miR-34a-5p hsa-miR-9-5p hsa-miR-423-3p hsa-miR-135b-5p hsa-miR-9-5p
TPD52L2	NC_000020.11	63865270	63891538	+	NM_003288.4	1312	63890540	3' UTR	GGACT	17	0.705882	0.999991	YES	YES	hsa-miR-1304-3p hsa-miR-589-5p hsa-miR-181a-2-3p hsa-miR-122-5p
TPM4	NC_000019.10	16076495	16103002	+	NM_003290.3	1449	16101977	3' UTR	TAATT	85	1	0.999965	NO	NO	NO
TPT1	NC_000013.11	45333471	45341183	-	NM_003295.4	1135	45336884	3' UTR	AGACT	129	0.818182	0.999998	YES	YES	NO
TPT1	NC_000013.11	45333471	45341183	-	NM_003295.4	725	45337294	3' UTR	GGACT	1633	0.697071	0.999925	YES	YES	hsa-let-7g-5p hsa-miR-24-3p hsa-miR-1910-5p hsa-miR-24-3p hsa-miR-217-3p
TPT1	NC_000013.11	45333471	45341183	-	NM_003295.4	973	45337046	3' UTR	GGACT	156	0.880597	0.999901	YES	YES	NO
HSP90B1	NC_000012.12	103930410	103947926	+	NM_003299.3	845	103934283	CDS	CAATT	148	1	0.999974	NO	NO	NO
PHLDA2	NC_000011.10	2928273	2929420	-	NM_003311.4	649	2928544	3' UTR	GGACT	181	0.6625	0.999985	YES	NO	hsa-miR-196a-5p hsa-miR-196a-5p hsa-miR-196b-5p hsa-miR-196a-5p
TST	NC_000022.11	37010865	37019447	-	NM_003312.6	542	37018260	CDS	GGACC	45	0.363636	0.999992	YES	YES	NO
TUFM	NC_000016.10	28842411	28846348	-	NM_003321.5	1567	28842855	3' UTR	GGACA	193	0.349462	0.999921	YES	YES	NO
UBA52	NC_000019.10	18571857	18577550	+	NM_003333.5	580	18575304	3' UTR	GGACT	31	0.607143	0.999991	YES	YES	hsa-let-7a-5p
UBA1	NC_000023.11	47193829	47215128	+	NM_003334.4	1724	47203649	CDS	AGAAG	26	0.857143	0.999906	NO	NO	NO
UBA1	NC_000023.11	47193829	47215128	+	NM_003334.4	2073	47206383	CDS	TGAGA	25	0.84	0.999977	NO	NO	hsa-miR-1304-3p hsa-miR-378a-3p hsa-miR-378c hsa-miR-27b-3p hsa-miR-27b-3p hsa-miR-27a-3p hsa-miR-378a-3p hsa-miR-378a-3p
UBE2A	NC_000023.11	119574563	119584423	+	NM_003336.4	1328	119583975	3' UTR	GGAAT	40	0.405405	0.99999	NO	NO	NO
UBE2D2	NC_000005.10	139561339	139628434	+	NM_003339.3	953	139626857	3' UTR	AGAAA	35	0.518519	0.999946	NO	NO	NO
UBE2D2	NC_000005.10	139561339	139628434	+	NM_003339.3	954	139626858	3' UTR	GAAAG	34	0.566667	0.999988	NO	NO	NO
UBE2L3	NC_000022.11	21567714	21624034	+	NM_003347.4	492	21621665	CDS	GGACT	189	0.705882	0.999919	YES	YES	NO
UBE2L3	NC_000022.11	21567714	21624034	+	NM_003347.4	1624	21622797	3' UTR	GGACT	13	0.666667	0.999953	YES	YES	hsa-miR-625-5p
UBE2L3	NC_000022.11	21567714	21624034	+	NM_003347.4	1641	21622814	3' UTR	GGACT	19	0.611111	0.999992	YES	YES	hsa-miR-627-5p hsa-miR-210-3p hsa-miR-4677-3p hsa-miR-320a-3p hsa-miR-4677-3p
UBE2N	NC_000012.12	93405684	93441947	-	NM_003348.4	214	93411179	CDS	GGACT	69	0.530303	0.999903	YES	NO	hsa-miR-203b-5p hsa-miR-148a-5p hsa-miR-3184-3p
UBE2V2	NC_000008.11	48008431	48064708	+	NM_003350.3	586	48060952	3' UTR	GGACA	60	0.783333	0.999997	YES	YES	NO
USP1	NC_000001.11	62437049	62451804	+	NM_003368.5	2422	62450624	CDS	GGACT	14	0.642857	0.999977	YES	YES	hsa-let-7d-5p hsa-let-7d-5p hsa-let-7d-5p
VASP	NC_000019.10	45507479	45526983	+	NM_003370.4	1983	45526724	3' UTR	ATATC	13	1	0.999948	NO	NO	NO
VCL	NC_000010.11	73998116	74121363	+	NM_003373.4	3276	74118152	CDS	AGACT	13	0.777778	0.999982	YES	YES	NO
VCL	NC_000010.11	73998116	74121363	+	NM_003373.4	3569	74118445	3' UTR	GGACT	13	0.692308	0.999926	YES	YES	NO
VDAC2	NC_000010.11	75210170	75231448	+	NM_003375.5	358	75210856	5'UTR	GGAGC	37	1	0.999964	NO	NO	NO
YY1	NC_000014.9	100239144	100282788	+	NM_003403.5	1476	100277730	3' UTR	GGACA	52	0.78	0.999999	YES	YES	hsa-miR-330-3p hsa-miR-34a-5p
YY1	NC_000014.9	100239144	100282788	+	NM_003403.5	1668	100277922	3' UTR	GGACT	50	0.979167	0.999997	YES	YES	hsa-miR-186-5p hsa-miR-19a-3p hsa-miR-19b-3p hsa-miR-186-5p hsa-miR-186-5p hsa-miR-186-5p hsa-miR-19b-3p hsa-miR-186-5p hsa-miR-186-5p hsa-miR-186-5p hsa-miR-660-5p hsa-miR-34a-5p
YWHAB	NC_000020.11	44885705	44908532	+	NM_003404.5	410	44901663	CDS	GAAAT	23	0.26087	0.999946	NO	NO	hsa-miR-103a-3p hsa-miR-103a-3p hsa-miR-107
YWHAH	NC_000022.11	31944535	31957603	+	NM_003405.4	1118	31956970	3' UTR	GGACT	53	0.980392	0.999941	YES	YES	NO
YWHAH	NC_000022.11	31944535	31957603	+	NM_003405.4	825	31956677	CDS	GGACA	43	0.6	0.999989	YES	YES	hsa-miR-147b-3p hsa-miR-1282 hsa-miR-597-5p hsa-miR-4326 hsa-miR-142-3p hsa-miR-145-5p hsa-miR-142-3p hsa-miR-142-3p hsa-miR-145-5p hsa-miR-196a-5p hsa-miR-455-5p hsa-miR-145-5p hsa-miR-145-5p
YWHAH	NC_000022.11	31944535	31957603	+	NM_003405.4	852	31956704	CDS	GGACT	52	0.784314	0.99998	YES	YES	hsa-miR-3140-3p hsa-miR-30c-1-3p hsa-miR-148b-5p hsa-miR-148b-5p hsa-miR-148b-5p
PTP4A1	NC_000006.12	63572480	63583588	+	NM_003463.5	499	63576694	5'UTR	GGATT	27	0.434783	0.999903	NO	NO	hsa-miR-30d-3p
PTP4A1	NC_000006.12	63572480	63583588	+	NM_003463.5	603	63576798	5'UTR	AGACT	27	0.423077	0.999932	YES	YES	NO
DEK	NC_000006.12	18223860	18264530	-	NM_003472.4	2811	18224191	3' UTR	TAAAT	35	0.517241	0.999911	NO	NO	NO
SLC7A5	NC_000016.10	87830023	87869507	-	NM_003486.7	3541	87831038	3' UTR	GGACA	106	0.451923	0.999972	YES	YES	hsa-miR-324-3p
SLC7A5	NC_000016.10	87830023	87869507	-	NM_003486.7	4092	87830487	3' UTR	GGACT	139	0.480315	0.999906	YES	YES	hsa-miR-132-3p hsa-miR-378c hsa-miR-378c hsa-miR-449c-5p hsa-miR-132-3p
SLC7A5	NC_000016.10	87830023	87869507	-	NM_003486.7	2243	87832336	3' UTR	GGACT	21	0.761905	0.999982	YES	YES	hsa-miR-183-5p hsa-miR-183-5p hsa-miR-183-5p hsa-miR-183-5p hsa-miR-203b-5p hsa-miR-183-5p hsa-miR-183-5p
SLC7A5	NC_000016.10	87830023	87869507	-	NM_003486.7	3227	87831352	3' UTR	GGACT	73	0.728571	0.999992	YES	YES	NO
SLC7A5	NC_000016.10	87830023	87869507	-	NM_003486.7	3423	87831156	3' UTR	GGACT	90	0.920455	1	YES	YES	hsa-miR-101-3p hsa-miR-128-3p hsa-miR-34a-5p
SLC7A5	NC_000016.10	87830023	87869507	-	NM_003486.7	3709	87830870	3' UTR	GGACG	46	0.244444	0.99996	NO	YES	hsa-miR-335-5p
TMEM187	NC_000023.11	153972754	153983194	+	NM_003492.3	1156	153982898	3' UTR	GGACT	24	0.869565	0.999991	YES	YES	NO
TMEM187	NC_000023.11	153972754	153983194	+	NM_003492.3	1225	153982967	3' UTR	AGACT	22	0.789474	0.999993	YES	YES	NO
TMEM187	NC_000023.11	153972754	153983194	+	NM_003492.3	664	153982406	CDS	GGACC	17	0.470588	0.999979	YES	YES	NO
H2AC6	NC_000006.12	26124172	26124690	+	NM_003512.4	70	26124241	CDS	GGACG	27	0.307692	0.999963	NO	NO	NO
SLC25A11	NC_000017.11	4937130	4940046	-	NM_003562.5	1210	4937612	3' UTR	GGACT	70	0.823529	0.999997	YES	YES	NO
ULK1	NC_000012.12	131894622	131923150	+	NM_003565.4	4974	131922802	3' UTR	GGACT	15	0.538462	0.999986	YES	NO	hsa-miR-505-3p
DUSP11	NC_000002.12	73762213	73780103	-	NM_003584.3	1076	73762707	CDS	TAATT	26	1	0.999913	NO	NO	NO
DUSP11	NC_000002.12	73762213	73780103	-	NM_003584.3	1114	73762669	CDS	GGACC	21	0.47619	0.999989	YES	YES	NO
DUSP11	NC_000002.12	73762213	73780103	-	NM_003584.3	1183	73762600	3' UTR	TGACT	28	0.48	0.999914	YES	NO	NO
TPST2	NC_000022.11	26521996	26590132	-	NM_003595.5	716	26541155	CDS	GGACC	9	1	0.999957	YES	YES	hsa-miR-193a-5p
SMARCA5	NC_000004.12	143513702	143557486	+	NM_003601.4	2022	143540391	CDS	TAAGA	12	1	0.999942	NO	NO	hsa-miR-3064-5p
SMARCA5	NC_000004.12	143513702	143557486	+	NM_003601.4	3236	143550024	CDS	TAATT	28	1	0.999984	NO	NO	hsa-miR-106a-5p hsa-miR-20a-5p hsa-miR-26b-5p hsa-miR-106b-5p hsa-miR-93-5p hsa-miR-26b-5p hsa-miR-17-5p
RAE1	NC_000020.11	57351255	57379202	+	NM_003610.4	1380	57378197	3' UTR	GGACA	44	0.348837	0.999991	YES	YES	NO
SLC27A2	NC_000015.10	50182196	50236385	+	NM_003645.4	1786	50229041	CDS	CCAGA	16	0.916667	0.999946	NO	NO	NO
YBX3	NC_000012.12	10699089	10723323	-	NM_003651.5	1478	10699542	3' UTR	GGACA	57	0.75	0.999947	YES	NO	hsa-miR-181b-5p hsa-miR-181b-5p hsa-miR-19a-3p hsa-miR-181a-5p hsa-miR-181b-5p hsa-miR-19a-3p hsa-miR-181b-5p hsa-miR-19a-3p
DEGS1	NC_000001.11	224183240	224193441	+	NM_003676.4	291	224189688	CDS	GGACT	33	0.9375	0.999997	YES	YES	NO
DEGS1	NC_000001.11	224183240	224193441	+	NM_003676.4	687	224190084	CDS	TGACA	43	0.595238	0.999963	YES	YES	hsa-miR-106b-5p hsa-miR-106b-5p hsa-miR-106b-5p hsa-miR-19b-3p hsa-miR-19b-3p hsa-miR-19a-3p hsa-miR-19b-3p hsa-miR-19a-3p hsa-miR-19b-3p hsa-miR-19b-3p hsa-miR-106b-5p hsa-miR-19b-3p hsa-miR-106b-5p
DEGS1	NC_000001.11	224183240	224193441	+	NM_003676.4	778	224190175	CDS	GGACA	32	1	0.999995	YES	YES	hsa-miR-106b-5p hsa-miR-106b-5p hsa-miR-142-5p hsa-miR-20a-5p hsa-miR-106b-5p hsa-miR-142-5p hsa-miR-142-5p hsa-miR-340-5p hsa-miR-340-5p hsa-miR-106b-5p
DENR	NC_000012.12	122752824	122771064	+	NM_003677.5	2337	122770682	3' UTR	GGACA	39	0.307692	0.999968	YES	NO	NO
YARS1	NC_000001.11	32775239	32817358	-	NM_003680.4	1816	32775866	3' UTR	GGACT	51	0.960784	0.999998	YES	YES	hsa-miR-142-5p
YARS1	NC_000001.11	32775239	32817358	-	NM_003680.4	2096	32775586	3' UTR	GGACT	43	0.357143	0.999905	YES	YES	NO
RRP1	NC_000021.9	43789577	43805293	+	NM_003683.6	1522	43803857	3' UTR	AGACT	13	0.545455	0.999966	YES	YES	NO
RUVBL1	NC_000003.12	128080810	128123812	-	NM_003707.3	1487	128081222	3' UTR	AGACT	75	0.57971	0.999972	YES	YES	NO
DYNLL1	NC_000012.12	120496113	120498493	+	NM_003746.3	389	120498219	3' UTR	GGACT	479	0.650549	0.999937	YES	NO	hsa-miR-101-3p hsa-miR-101-3p hsa-miR-101-3p hsa-miR-455-3p hsa-miR-5581-3p hsa-miR-101-3p hsa-miR-455-3p hsa-miR-101-3p hsa-miR-101-3p hsa-miR-183-5p hsa-miR-128-3p hsa-miR-183-5p hsa-miR-101-3p hsa-miR-455-3p hsa-miR-5581-3p hsa-miR-455-3p hsa-miR-101-3p hsa-miR-455-3p
EIF3A	NC_000010.11	119033670	119080817	-	NM_003750.4	4255	119036074	CDS	AGACT	31	0.655172	0.999994	YES	YES	hsa-miR-141-5p hsa-miR-361-5p hsa-miR-141-5p hsa-miR-335-3p hsa-miR-141-5p
EIF3A	NC_000010.11	119033670	119080817	-	NM_003750.4	5264	119035065	3' UTR	TGATA	38	0.361111	0.999976	NO	NO	NO
EIF3B	NC_000007.14	2354827	2380745	+	NM_003751.4	2639	2380363	3' UTR	GGACT	16	0.5625	0.999941	YES	YES	hsa-miR-27a-3p hsa-miR-23a-3p hsa-miR-27b-3p hsa-miR-4454 hsa-miR-128-3p hsa-miR-26a-5p hsa-miR-132-3p hsa-miR-101-3p hsa-miR-1910-5p hsa-miR-128-3p hsa-miR-27b-3p hsa-miR-26a-5p hsa-miR-23b-3p hsa-miR-128-3p hsa-miR-23a-3p hsa-miR-582-5p hsa-miR-23a-3p hsa-miR-27b-3p hsa-miR-23a-3p hsa-miR-27a-3p hsa-miR-101-3p hsa-miR-27a-3p hsa-miR-27a-3p hsa-miR-128-3p hsa-miR-101-3p
EIF3J	NC_000015.10	44537147	44562803	+	NM_003758.4	1471	44561795	3' UTR	AGACT	37	0.583333	0.999969	YES	YES	hsa-miR-378d hsa-miR-708-3p hsa-miR-378a-3p hsa-miR-378d hsa-miR-708-3p hsa-let-7f-2-3p hsa-miR-378a-3p hsa-miR-708-3p hsa-miR-378a-3p hsa-miR-378d hsa-miR-708-3p
TRADD	NC_000016.10	67154185	67159909	-	NM_003789.4	1106	67154562	3' UTR	GGACC	14	0.615385	0.999965	YES	YES	hsa-miR-203b-5p
TRADD	NC_000016.10	67154185	67159909	-	NM_003789.4	1346	67154322	3' UTR	GGACT	16	0.875	0.999996	YES	YES	NO
TRADD	NC_000016.10	67154185	67159909	-	NM_003789.4	860	67154808	CDS	GGACT	15	0.769231	0.999904	YES	YES	NO
MBTPS1	NC_000016.10	84053763	84116942	-	NM_003791.4	3954	84054186	3' UTR	AGACT	16	0.533333	0.999942	YES	YES	NO
SNX4	NC_000003.12	125446650	125520202	-	NM_003794.4	630	125489461	CDS	GCAGA	18	1	0.999943	NO	NO	NO
TNFSF9	NC_000019.10	6531026	6535924	+	NM_003811.4	1049	6535339	3' UTR	GGACT	43	0.902439	0.999993	YES	YES	NO
TNFSF9	NC_000019.10	6531026	6535924	+	NM_003811.4	1120	6535410	3' UTR	GGACT	41	0.95	0.999999	YES	YES	NO
TNFSF9	NC_000019.10	6531026	6535924	+	NM_003811.4	1273	6535563	3' UTR	ATAGA	48	0.756757	0.999906	NO	NO	NO
TNFSF9	NC_000019.10	6531026	6535924	+	NM_003811.4	562	6534852	CDS	GGACC	31	0.5	0.999992	YES	YES	NO
TNFSF9	NC_000019.10	6531026	6535924	+	NM_003811.4	719	6535009	CDS	GGACT	53	0.98	1	YES	YES	NO
TNFSF9	NC_000019.10	6531026	6535924	+	NM_003811.4	752	6535042	CDS	GGACT	50	0.897959	0.999999	YES	YES	NO
TNFSF9	NC_000019.10	6531026	6535924	+	NM_003811.4	949	6535239	3' UTR	GGACC	51	0.787234	0.999983	YES	YES	NO
FADD	NC_000011.10	70203296	70207390	+	NM_003824.4	1314	70206996	3' UTR	GGACA	35	1	0.999983	YES	YES	NO
FADD	NC_000011.10	70203296	70207390	+	NM_003824.4	840	70206522	3' UTR	GGACT	24	1	0.999982	YES	YES	hsa-miR-106b-5p
NAPA	NC_000019.10	47487637	47515063	-	NM_003827.4	1645	47487654	3' UTR	AAAAC	17	0.941176	0.999931	NO	NO	hsa-miR-106a-5p hsa-miR-106b-5p
TNFRSF10B	NC_000008.11	23020133	23069031	-	NM_003842.5	1527	23022604	3' UTR	GGACT	7	1	0.999959	YES	YES	NO
SUCLA2	NC_000013.11	47942656	48001273	-	NM_003850.3	1540	47943227	3' UTR	GGACT	43	0.512821	0.999959	YES	YES	NO
SUCLA2	NC_000013.11	47942656	48001273	-	NM_003850.3	1569	47943198	3' UTR	GGACT	36	0.529412	0.999942	YES	YES	NO
SUCLA2	NC_000013.11	47942656	48001273	-	NM_003850.3	792	47968609	CDS	AGATT	31	0.62069	0.999978	NO	NO	NO
CREG1	NC_000001.11	167541013	167553762	-	NM_003851.3	1337	167541645	3' UTR	AAAGA	73	0.939394	0.999998	NO	NO	NO
DPM2	NC_000009.12	127935099	127937854	-	NM_003863.4	639	127935372	3' UTR	GGACT	46	0.933333	0.999999	YES	YES	NO
IQGAP1	NC_000015.10	90388242	90502239	+	NM_003870.4	5237	90500271	3' UTR	GGACA	23	0.681818	0.999938	YES	YES	hsa-miR-194-5p hsa-miR-124-3p
TMEM11	NC_000017.11	21197954	21214161	-	NM_003876.3	514	21198398	CDS	AGAGA	27	0.958333	0.999994	NO	NO	hsa-miR-34a-5p
TMEM11	NC_000017.11	21197954	21214161	-	NM_003876.3	516	21198396	CDS	AGACT	29	0.892857	0.999921	YES	YES	hsa-miR-34a-5p
TMEM11	NC_000017.11	21197954	21214161	-	NM_003876.3	635	21198277	3' UTR	AGACA	32	0.566667	0.999955	YES	YES	NO
CCN5	NC_000020.11	44715369	44727811	+	NM_003881.4	1168	44727700	3' UTR	GGACT	90	0.406977	0.999915	YES	NO	NO
EIF2S2	NC_000020.11	34088309	34112243	-	NM_003908.5	1183	34089682	3' UTR	GGACA	108	0.747664	0.999994	YES	YES	NO
IER3	NC_000006.12	30743199	30744547	-	NM_003897.4	592	30743844	3' UTR	GGACT	99	0.678161	0.999998	YES	YES	hsa-miR-27b-3p hsa-miR-27a-3p hsa-miR-27b-3p hsa-miR-30d-3p hsa-miR-148b-5p hsa-miR-148b-5p hsa-miR-425-3p hsa-miR-106b-5p hsa-miR-106b-5p hsa-miR-17-5p hsa-miR-185-5p hsa-miR-200c-3p hsa-miR-20a-5p hsa-miR-20a-5p hsa-miR-210-3p hsa-miR-26a-5p hsa-miR-27a-3p hsa-miR-27a-3p hsa-miR-29a-3p hsa-miR-29a-3p hsa-miR-29b-3p hsa-miR-92a-3p hsa-miR-320a-3p
TIMELESS	NC_000012.12	56416363	56449426	-	NM_003920.5	3972	56417549	3' UTR	GGACT	14	0.636364	0.999955	YES	NO	NO
MBD2	NC_000018.10	54151606	54224669	-	NM_003927.5	852	54188972	CDS	AAACA	28	1	0.999938	YES	NO	NO
ATP6V0E1	NC_000005.10	172983771	173035445	+	NM_003945.4	727	173034753	3' UTR	AGACT	167	0.597484	0.999968	YES	YES	NO
RPS6KB2	NC_000011.10	67428494	67435401	+	NM_003952.3	1580	67435248	3' UTR	CCAGA	24	0.894737	0.999904	NO	NO	NO
MPZL1	NC_000001.11	167721982	167791919	+	NM_003953.6	1027	167787968	3' UTR	GGACT	10	0.8	0.999975	YES	YES	hsa-miR-145-5p
RNF8	NC_000006.12	37353983	37394734	+	NM_003958.4	1765	37390883	3' UTR	AGACT	15	0.692308	0.999939	YES	YES	hsa-miR-26a-5p hsa-miR-26b-5p
HIP1R	NC_000012.12	122835457	122862961	+	NM_003959.3	3699	122862151	3' UTR	GGACT	14	1	0.999981	YES	NO	NO
RHOB	NC_000002.12	20447074	20449440	+	NM_004040.4	1081	20448154	3' UTR	GGACC	73	0.782609	0.999998	YES	YES	hsa-let-7c-5p
RHOB	NC_000002.12	20447074	20449440	+	NM_004040.4	1419	20448492	3' UTR	ATAGA	95	0.895349	0.999997	NO	NO	hsa-miR-320a-3p hsa-let-7c-5p hsa-miR-223-3p
RHOB	NC_000002.12	20447074	20449440	+	NM_004040.4	1421	20448494	3' UTR	AGACC	89	0.790698	1	YES	YES	hsa-miR-320a-3p hsa-let-7c-5p hsa-miR-223-3p
RHOB	NC_000002.12	20447074	20449440	+	NM_004040.4	661	20447734	CDS	GGACT	60	0.716667	0.999999	YES	YES	hsa-miR-1285-3p hsa-miR-1285-3p hsa-miR-139-5p hsa-miR-139-5p hsa-miR-1285-3p hsa-miR-139-5p hsa-miR-627-5p hsa-miR-1285-3p hsa-miR-1285-3p hsa-miR-1285-3p
RHOB	NC_000002.12	20447074	20449440	+	NM_004040.4	751	20447824	CDS	AGACC	59	0.20339	0.999934	YES	YES	hsa-miR-34a-5p hsa-miR-34a-5p hsa-let-7a-5p hsa-let-7b-5p
ATIC	NC_000002.12	215312059	215349764	+	NM_004044.7	1108	215336050	CDS	TAATT	44	1	0.999977	NO	NO	NO
BYSL	NC_000006.12	41921499	41933046	+	NM_004053.4	1536	41932864	3' UTR	GGACT	32	0.793103	0.999947	YES	YES	NO
CS	NC_000012.12	56271699	56300330	-	NM_004077.3	1514	56273100	CDS	GGACT	50	0.591837	0.999966	YES	NO	hsa-miR-10b-5p
TIMM8A	NC_000023.11	101345661	101348742	-	NM_004085.4	488	101346383	3' UTR	GGACA	40	0.567568	0.999992	YES	YES	NO
TIMM8A	NC_000023.11	101345661	101348742	-	NM_004085.4	639	101346232	3' UTR	GGACT	21	0.55	0.999946	YES	YES	NO
DUSP3	NC_000017.11	43766125	43778977	-	NM_004090.4	3495	43766725	3' UTR	GGACT	36	0.363636	0.999902	YES	YES	NO
FEN1	NC_000011.10	61792911	61797238	+	NM_004111.6	1676	61796898	3' UTR	AGACT	106	0.871287	0.999999	YES	YES	NO
FASN	NC_000017.11	82078338	82098236	-	NM_004104.5	7800	82079002	3' UTR	AGATG	53	0.688889	0.999973	NO	NO	hsa-miR-424-5p
FDX1	NC_000011.10	110429948	110464884	+	NM_004109.5	820	110462560	3' UTR	GGACT	19	0.444444	0.999974	YES	YES	NO
FEN1	NC_000011.10	61792911	61797238	+	NM_004111.6	1529	61796751	3' UTR	GGACA	97	0.185567	0.999929	YES	YES	NO
FEN1	NC_000011.10	61792911	61797238	+	NM_004111.6	1670	61796892	3' UTR	GGACC	99	0.316327	0.999932	YES	YES	NO
FEN1	NC_000011.10	61792911	61797238	+	NM_004111.6	681	61795903	CDS	GGACT	68	0.983871	0.999954	YES	YES	hsa-let-7b-5p hsa-let-7c-5p hsa-let-7i-5p hsa-let-7a-5p hsa-let-7b-5p hsa-let-7c-5p hsa-let-7e-5p hsa-let-7g-5p hsa-let-7i-5p hsa-miR-98-5p hsa-let-7b-5p hsa-let-7c-5p hsa-let-7i-5p hsa-let-7a-5p hsa-let-7b-5p hsa-let-7c-5p hsa-let-7e-5p hsa-let-7g-5p hsa-let-7i-5p hsa-miR-196a-5p hsa-miR-98-5p hsa-let-7c-5p hsa-miR-196a-5p hsa-let-7b-5p hsa-let-7c-5p hsa-let-7i-5p hsa-miR-196a-5p
NINJ1	NC_000009.12	93121496	93134251	-	NM_004148.4	822	93121911	3' UTR	GGACA	58	0.618182	0.999954	YES	YES	NO
NINJ1	NC_000009.12	93121496	93134251	-	NM_004148.4	894	93121839	3' UTR	GGACA	62	0.574074	0.999965	YES	YES	hsa-miR-141-5p
NINJ1	NC_000009.12	93121496	93134251	-	NM_004148.4	1002	93121731	3' UTR	GGACC	39	0.263158	0.999973	YES	YES	hsa-miR-34a-5p
RAB1A	NC_000002.12	65086854	65130106	-	NM_004161.5	748	65088554	CDS	TGAGA	69	0.953846	0.999996	NO	NO	hsa-miR-92a-3p hsa-miR-92b-3p hsa-miR-3065-3p hsa-miR-92a-3p hsa-miR-92b-3p
RAB1A	NC_000002.12	65086854	65130106	-	NM_004161.5	750	65088552	CDS	AGAAG	67	0.95	0.99998	NO	NO	hsa-miR-92a-3p hsa-miR-92b-3p hsa-miR-92a-3p hsa-miR-92b-3p
RAB5A	NC_000003.12	19947097	19985175	+	NM_004162.5	1269	19983926	3' UTR	AGACT	18	0.588235	0.999989	YES	YES	NO
RAB5A	NC_000003.12	19947097	19985175	+	NM_004162.5	500	19950880	5'UTR	GGACT	16	0.875	0.999968	YES	YES	NO
SHMT1	NC_000017.11	18327873	18363550	-	NM_004169.5	1786	18328614	3' UTR	GGACT	17	0.647059	0.999957	YES	NO	NO
SLC9A3	NC_000005.10	470456	524449	-	NM_004174.4	4297	471714	3' UTR	GGATT	15	0.571429	0.999984	NO	NO	NO
SLC9A3	NC_000005.10	470456	524449	-	NM_004174.4	4669	471342	3' UTR	GGACC	13	0.916667	0.999984	YES	YES	NO
SLC16A3	NC_000017.11	82229042	82240086	+	NM_004207.4	1407	82238894	CDS	GGACT	93	0.7	0.999998	YES	YES	NO
SLC16A3	NC_000017.11	82229042	82240086	+	NM_004207.4	1566	82239053	3' UTR	GGACT	84	0.961538	0.99999	YES	YES	hsa-miR-27a-5p hsa-miR-671-3p
NEURL1	NC_000010.11	103493705	103592546	+	NM_004210.5	2182	103590146	CDS	CAATT	37	0.533333	0.999928	NO	NO	NO
RAB11B	NC_000019.10	8390360	8404434	+	NM_004218.4	1257	8404101	3' UTR	AGAAG	50	1	0.999972	NO	NO	NO
RAB11B	NC_000019.10	8390360	8404434	+	NM_004218.4	1258	8404102	3' UTR	GAAGC	48	1	0.99997	NO	NO	NO
RAB11B	NC_000019.10	8390360	8404434	+	NM_004218.4	861	8403705	3' UTR	GGACA	41	0.512821	0.999943	YES	YES	NO
RAB11B	NC_000019.10	8390360	8404434	+	NM_004218.4	903	8403747	3' UTR	AGAAG	42	1	0.999993	NO	NO	NO
RAB11B	NC_000019.10	8390360	8404434	+	NM_004218.4	904	8403748	3' UTR	GAAGC	41	0.944444	0.999994	NO	NO	NO
CD83	NC_000006.12	14117772	14136906	+	NM_004233.4	1013	14135591	3' UTR	ACAGA	17	1	0.999974	NO	NO	NO
CD83	NC_000006.12	14117772	14136906	+	NM_004233.4	1052	14135630	3' UTR	GGACA	14	0.769231	0.999953	YES	YES	NO
CD83	NC_000006.12	14117772	14136906	+	NM_004233.4	1132	14135710	3' UTR	TGAGA	21	0.833333	0.999954	NO	NO	NO
CD83	NC_000006.12	14117772	14136906	+	NM_004233.4	1402	14135980	3' UTR	GGACA	18	0.529412	0.999946	YES	YES	NO
CD83	NC_000006.12	14117772	14136906	+	NM_004233.4	1863	14136441	3' UTR	GGACA	16	0.75	0.999981	YES	YES	NO
CD83	NC_000006.12	14117772	14136906	+	NM_004233.4	1889	14136467	3' UTR	GGACT	17	0.764706	0.999991	YES	YES	NO
CD83	NC_000006.12	14117772	14136906	+	NM_004233.4	632	14135210	CDS	TGACT	15	0.692308	0.999966	YES	NO	hsa-let-7a-5p hsa-miR-423-5p
CD83	NC_000006.12	14117772	14136906	+	NM_004233.4	926	14135504	3' UTR	GGACA	18	1	0.999995	YES	YES	hsa-miR-186-5p hsa-miR-186-5p hsa-miR-576-3p hsa-miR-106a-5p hsa-miR-93-5p hsa-miR-576-3p hsa-miR-106b-5p hsa-miR-106b-5p hsa-miR-93-5p
COPS2	NC_000015.10	49122727	49155599	-	NM_004236.4	1303	49128000	CDS	GGACC	25	0.8	0.999988	YES	YES	hsa-miR-1306-3p hsa-miR-571 hsa-miR-133a-3p hsa-miR-133b hsa-miR-133a-3p hsa-miR-380-5p hsa-miR-876-3p hsa-miR-1468-5p
COPS2	NC_000015.10	49122727	49155599	-	NM_004236.4	1572	49127731	3' UTR	GGATT	27	0.5	0.999982	NO	NO	hsa-miR-103a-3p hsa-miR-107 hsa-miR-103a-3p hsa-miR-107 hsa-miR-103a-3p hsa-miR-107
TRIP13	NC_000005.10	892884	918120	+	NM_004237.4	1529	917218	3' UTR	AGACT	44	0.651163	0.999991	YES	YES	hsa-miR-155-5p
TRIP13	NC_000005.10	892884	918120	+	NM_004237.4	1920	917609	3' UTR	AGACT	46	0.348837	0.999976	YES	YES	hsa-miR-155-5p
TRIP10	NC_000019.10	6739680	6751530	+	NM_004240.4	1999	6751490	3' UTR	AAAAA	37	0.9375	0.999907	NO	NO	NO
TRIP10	NC_000019.10	6739680	6751530	+	NM_004240.4	2000	6751491	3' UTR	AAAAA	36	0.9	0.99992	NO	NO	NO
HMGN3	NC_000006.12	79201245	79234682	-	NM_004242.4	556	79201554	3' UTR	GGACA	17	0.588235	0.999941	YES	YES	hsa-miR-1-3p hsa-miR-142-5p
EFTUD2	NC_000017.11	44849948	44899445	-	NM_004247.4	3009	44851265	3' UTR	GGACT	34	0.909091	0.999966	YES	YES	NO
RAB9A	NC_000023.11	13689128	13710504	+	NM_004251.5	435	13708905	CDS	GGACA	27	0.884615	0.999985	YES	YES	hsa-miR-194-5p
MED27	NC_000009.12	131860112	132079867	-	NM_004269.4	1142	131860355	3' UTR	GGACT	23	0.636364	0.999965	YES	YES	NO
MED27	NC_000009.12	131860112	132079867	-	NM_004269.4	1167	131860330	3' UTR	GGACT	18	0.75	0.999988	YES	YES	NO
MED7	NC_000005.10	157137424	157142865	-	NM_004270.5	335	157139160	CDS	GGACC	7	1	0.999926	YES	YES	hsa-miR-26a-5p hsa-miR-26b-5p
BAG2	NC_000006.12	57172326	57189833	+	NM_004282.4	898	57184080	CDS	AGACT	53	0.96	0.999916	YES	YES	NO
TRAF4	NC_000017.11	28744011	28750956	+	NM_004295.4	1321	28749383	CDS	AGACC	30	0.214286	0.999925	YES	YES	hsa-miR-4446-3p hsa-miR-4446-3p hsa-miR-4446-3p hsa-miR-30b-3p hsa-miR-30b-3p hsa-miR-30b-3p hsa-miR-30b-3p hsa-miR-139-5p hsa-miR-139-5p hsa-miR-139-5p hsa-miR-99b-3p hsa-miR-99b-3p hsa-miR-24-3p hsa-miR-30d-3p hsa-miR-128-3p hsa-miR-7-5p hsa-miR-128-3p
TRAF4	NC_000017.11	28744011	28750956	+	NM_004295.4	1433	28749495	CDS	GGACA	21	0.95	0.999905	YES	YES	NO
ARHGDIA	NC_000017.11	81867721	81871337	-	NM_004309.6	1056	81868502	3' UTR	GGACG	56	0.236364	0.999956	NO	NO	NO
ARHGDIA	NC_000017.11	81867721	81871337	-	NM_004309.6	1698	81867860	3' UTR	GGACC	54	0.148148	0.999954	YES	YES	hsa-miR-33b-5p hsa-miR-33a-5p hsa-miR-33a-5p hsa-miR-33b-5p hsa-miR-33b-5p hsa-miR-33a-5p
GET3	NC_000019.10	12737497	12748323	+	NM_004317.4	817	12747485	CDS	AGATT	32	0.923077	0.999951	NO	NO	hsa-miR-25-3p hsa-miR-592 hsa-miR-597-5p hsa-miR-92a-3p hsa-miR-92b-3p hsa-miR-23a-3p hsa-miR-92a-3p hsa-miR-92b-3p hsa-miR-25-3p hsa-miR-363-3p hsa-miR-92b-3p hsa-miR-25-3p hsa-miR-92b-3p hsa-miR-23b-3p hsa-miR-92a-3p
BNIP3L	NC_000008.11	26383054	26413127	+	NM_004331.3	1259	26410934	3' UTR	AAAAA	33	0.740741	0.999917	NO	NO	NO
PTTG1IP	NC_000021.9	44849598	44873690	-	NM_004339.4	2287	44849911	3' UTR	GGACT	28	0.740741	0.999991	YES	YES	hsa-miR-17-5p hsa-miR-20a-5p hsa-miR-20b-5p hsa-miR-93-5p hsa-miR-101-3p
CDC34	NC_000019.10	531760	542087	+	NM_004359.2	1187	541856	3' UTR	GGACT	44	0.731707	0.999968	YES	YES	NO
CDC34	NC_000019.10	531760	542087	+	NM_004359.2	927	541596	3' UTR	GGACC	45	0.333333	0.999946	YES	YES	hsa-miR-125b-1-3p
CDC34	NC_000019.10	531760	542087	+	NM_004359.2	950	541619	3' UTR	AGACT	41	0.852941	0.99994	YES	YES	hsa-let-7a-5p hsa-let-7b-5p hsa-let-7c-5p hsa-let-7d-5p hsa-let-7e-5p hsa-let-7f-5p hsa-let-7g-5p hsa-let-7i-5p hsa-miR-196a-5p hsa-let-7a-5p hsa-let-7b-5p hsa-let-7c-5p hsa-let-7d-5p hsa-let-7e-5p hsa-let-7f-5p hsa-let-7g-5p hsa-let-7i-5p hsa-miR-196a-5p hsa-miR-98-5p hsa-let-7a-5p hsa-let-7b-5p hsa-let-7c-5p hsa-let-7d-5p hsa-let-7e-5p hsa-let-7f-5p hsa-let-7g-5p hsa-let-7i-5p hsa-miR-196a-5p h…
DAP	NC_000005.10	10679230	10761234	-	NM_004394.3	1268	10680263	3' UTR	GGACC	56	0.254545	0.999934	YES	YES	NO
DAP	NC_000005.10	10679230	10761234	-	NM_004394.3	1286	10680245	3' UTR	AGACT	74	0.397059	0.999932	YES	YES	NO
DLX2	NC_000002.12	172099438	172102900	-	NM_004405.4	1624	172100268	3' UTR	GGACT	11	0.545455	0.999916	YES	YES	NO
DUSP1	NC_000005.10	172768096	172771195	-	NM_004417.4	1069	172769040	CDS	GGACT	39	0.34375	0.999928	YES	YES	NO
DUSP1	NC_000005.10	172768096	172771195	-	NM_004417.4	1386	172768723	3' UTR	GGACT	46	0.790698	0.999998	YES	YES	hsa-miR-107 hsa-miR-615-5p hsa-miR-103a-3p hsa-miR-107
DUSP1	NC_000005.10	172768096	172771195	-	NM_004417.4	1516	172768593	3' UTR	AGACA	50	0.395833	0.999938	YES	YES	hsa-miR-550a-3p
DUSP1	NC_000005.10	172768096	172771195	-	NM_004417.4	1600	172768509	3' UTR	GGACT	52	0.58	0.999933	YES	YES	hsa-miR-320b hsa-miR-320a-3p
DUSP1	NC_000005.10	172768096	172771195	-	NM_004417.4	326	172770870	CDS	GGACT	24	0.652174	0.999985	YES	YES	hsa-miR-34a-5p hsa-miR-34a-5p hsa-miR-34a-5p hsa-miR-34a-5p hsa-miR-34a-5p
DUSP2	NC_000002.12	96143169	96145440	-	NM_004418.4	1085	96143769	3' UTR	GGACT	50	0.5625	0.99994	YES	YES	NO
EFNA1	NC_000001.11	155127876	155134899	+	NM_004428.3	419	155131563	CDS	TGAGA	22	1	0.999983	NO	NO	NO
EFNA1	NC_000001.11	155127876	155134899	+	NM_004428.3	679	155134026	CDS	GGACT	26	0.565217	0.999992	YES	YES	hsa-miR-107 hsa-miR-15a-5p hsa-miR-103a-3p hsa-miR-107 hsa-miR-15a-5p hsa-miR-15b-5p hsa-miR-16-5p hsa-miR-195-5p hsa-miR-424-5p hsa-miR-16-5p hsa-miR-15a-5p hsa-miR-15b-5p hsa-miR-107 hsa-miR-103a-3p hsa-miR-15a-5p hsa-miR-101-3p hsa-miR-15a-5p hsa-miR-16-5p hsa-miR-15b-5p hsa-miR-107 hsa-miR-103a-3p hsa-miR-132-3p hsa-miR-101-3p hsa-miR-103a-3p hsa-miR-15a-5p hsa-miR-15a-5p hsa-miR-16-5p hsa-mi…
ELF3	NC_000001.11	202010587	202017183	+	NM_004433.5	1265	202015344	3' UTR	GGACC	28	0.321429	0.999931	YES	YES	NO
ELF3	NC_000001.11	202010587	202017183	+	NM_004433.5	1278	202015357	3' UTR	GGACC	25	0.541667	0.999988	YES	YES	hsa-miR-203b-5p
ELF3	NC_000001.11	202010587	202017183	+	NM_004433.5	1406	202015485	3' UTR	GGACT	39	0.894737	0.999997	YES	YES	NO
ELF3	NC_000001.11	202010587	202017183	+	NM_004433.5	1414	202015493	3' UTR	AGACT	36	0.30303	0.999906	YES	YES	hsa-miR-33a-5p
ELF3	NC_000001.11	202010587	202017183	+	NM_004433.5	1473	202015552	3' UTR	TGACT	38	0.771429	0.999993	YES	YES	hsa-miR-15b-5p hsa-miR-340-5p hsa-miR-107 hsa-miR-106b-5p hsa-miR-17-5p hsa-miR-20a-5p
ELF3	NC_000001.11	202010587	202017183	+	NM_004433.5	1531	202015610	3' UTR	AGACA	33	0.516129	0.999997	YES	YES	NO
ELF3	NC_000001.11	202010587	202017183	+	NM_004433.5	1572	202015651	3' UTR	GGACT	36	0.909091	0.999907	YES	YES	hsa-miR-24-3p hsa-miR-339-5p
ELF3	NC_000001.11	202010587	202017183	+	NM_004433.5	1656	202015735	3' UTR	GGACT	32	0.9375	0.999974	YES	YES	NO
ENDOG	NC_000009.12	128818500	128822676	+	NM_004435.2	1095	128822626	3' UTR	TGAGA	51	0.775	0.999954	NO	NO	NO
ENDOG	NC_000009.12	128818500	128822676	+	NM_004435.2	1097	128822628	3' UTR	AGACT	46	0.65	0.999911	YES	YES	NO
ENDOG	NC_000009.12	128818500	128822676	+	NM_004435.2	290	128818789	CDS	GGACT	42	0.527778	0.999942	YES	YES	NO
ENSA	NC_000001.11	150622125	150629612	-	NM_004436.4	1169	150622183	3' UTR	GGACT	68	0.375	0.999921	YES	YES	hsa-miR-3184-3p hsa-miR-3184-3p
ESRRA	NC_000011.10	64305524	64316743	+	NM_004451.5	1493	64315962	CDS	GGACT	16	0.875	0.999988	YES	YES	hsa-miR-148a-3p hsa-miR-148b-3p hsa-miR-33a-5p hsa-miR-30e-3p hsa-miR-30e-3p hsa-miR-148a-3p hsa-miR-33a-5p hsa-miR-30a-3p hsa-miR-24-3p hsa-miR-205-5p
FDFT1	NC_000008.11	11802741	11839298	+	NM_004462.5	1332	11838595	CDS	AGACT	27	0.65	0.9999	YES	YES	hsa-miR-139-5p hsa-miR-182-3p
FDFT1	NC_000008.11	11802741	11839298	+	NM_004462.5	1475	11838738	3' UTR	GGACC	25	0.24	0.999931	YES	YES	NO
HOXB7	NC_000017.11	48607232	48611017	-	NM_004502.4	1027	48607568	3' UTR	GGATA	25	0.958333	0.99996	NO	NO	hsa-miR-196b-5p
HOXB7	NC_000017.11	48607232	48611017	-	NM_004502.4	1029	48607566	3' UTR	ATATT	25	1	0.999973	NO	NO	hsa-miR-196a-5p hsa-miR-199a-3p hsa-miR-196b-5p hsa-let-7d-5p hsa-miR-196a-5p
HOXB7	NC_000017.11	48607232	48611017	-	NM_004502.4	1145	48607450	3' UTR	GGACT	40	0.6	0.999981	YES	YES	NO
IDI1	NC_000010.11	1039419	1049119	-	NM_004508.4	776	1041382	CDS	CCAGA	14	1	0.999968	NO	NO	hsa-miR-149-5p
FOXK2	NC_000017.11	82519732	82604602	+	NM_004514.4	2296	82601655	3' UTR	AGACA	16	0.8	0.999985	YES	YES	NO
FOXK2	NC_000017.11	82519732	82604602	+	NM_004514.4	2628	82601987	3' UTR	TGAGA	19	1	0.99997	NO	NO	hsa-miR-545-5p hsa-miR-17-5p
FOXK2	NC_000017.11	82519732	82604602	+	NM_004514.4	2630	82601989	3' UTR	AGACT	19	1	0.999981	YES	YES	hsa-miR-17-5p
FOXK2	NC_000017.11	82519732	82604602	+	NM_004514.4	2841	82602200	3' UTR	GGACA	20	0.75	0.999997	YES	YES	NO
FOXK2	NC_000017.11	82519732	82604602	+	NM_004514.4	2918	82602277	3' UTR	GGACT	17	0.6	0.999989	YES	YES	hsa-miR-423-3p hsa-miR-183-5p
PCK2	NC_000014.9	24094311	24104125	+	NM_004563.4	2146	24104092	3' UTR	AGACT	14	1	0.999992	YES	YES	hsa-miR-330-5p hsa-miR-92a-3p
RABGGTB	NC_000001.11	75786256	75795086	+	NM_004582.4	622	75792207	CDS	GCAAT	22	1	0.999991	NO	NO	NO
RABGGTB	NC_000001.11	75786256	75795086	+	NM_004582.4	623	75792208	CDS	CAATT	21	1	0.999913	NO	NO	NO
SCO1	NC_000017.11	10672474	10697533	-	NM_004589.4	1318	10680733	3' UTR	GGACT	40	0.894737	0.999959	YES	YES	NO
SCO1	NC_000017.11	10672474	10697533	-	NM_004589.4	833	10681218	CDS	CCAGA	12	0.7	0.999925	NO	NO	NO
TTC4	NC_000001.11	54715861	54742657	+	NM_004623.5	1451	54741752	3' UTR	GGACT	9	0.875	0.999944	YES	YES	NO
TTC4	NC_000001.11	54715861	54742657	+	NM_004623.5	1528	54741829	3' UTR	GGACT	10	0.8	0.999978	YES	YES	NO
TTC4	NC_000001.11	54715861	54742657	+	NM_004623.5	1848	54742149	3' UTR	AGACT	10	0.9	0.999918	YES	YES	NO
DAP3	NC_000001.11	155689091	155739010	+	NM_004632.4	1413	155738367	3' UTR	GGACT	23	0.727273	0.99992	YES	YES	hsa-miR-339-5p hsa-miR-1296-5p
CDC23	NC_000005.10	138187650	138213323	-	NM_004661.4	1948	138188835	3' UTR	TAATT	14	1	0.999979	NO	NO	hsa-miR-196a-5p hsa-let-7a-5p hsa-let-7b-5p hsa-let-7c-5p hsa-let-7d-5p hsa-let-7i-5p hsa-miR-98-5p
ATP6V0D1	NC_000016.10	67438019	67481157	-	NM_004691.5	1297	67438358	3' UTR	AGACT	49	0.711111	0.999971	YES	YES	NO
ATG12	NC_000005.10	115828200	115841565	-	NM_004707.4	524	115831716	3' UTR	AGACT	37	0.515152	0.999985	YES	YES	NO
ATG12	NC_000005.10	115828200	115841565	-	NM_004707.4	599	115831641	3' UTR	GGACT	30	0.62069	0.999996	YES	YES	hsa-miR-181a-5p hsa-miR-181b-5p hsa-miR-181a-5p hsa-miR-181b-5p
SYNGR2	NC_000017.11	78168581	78172720	+	NM_004710.7	1103	78172328	3' UTR	AGACT	44	0.930233	0.999996	YES	YES	hsa-miR-193a-5p hsa-miR-101-3p hsa-miR-125b-1-3p hsa-miR-101-3p
SYNGR2	NC_000017.11	78168581	78172720	+	NM_004710.7	764	78171989	3' UTR	GGACT	18	0.866667	0.999989	YES	YES	NO
COX7A2L	NC_000002.12	42349338	42361217	-	NM_004718.4	417	42351203	3' UTR	GGACT	38	0.742857	0.999987	YES	YES	NO
ZW10	NC_000011.10	113733187	113773692	-	NM_004724.4	2437	113733623	3' UTR	AGACT	11	0.777778	0.999914	YES	YES	NO
ZBED1_1	NC_000024.10	2486435	2500976	-	NM_004729.4	4223	2486707	3' UTR	GGACA	13	0.75	0.999982	YES	NO	NO
ETF1	NC_000005.10	138506095	138543236	-	NM_004730.4	1710	138508067	3' UTR	GGACT	25	1	0.999964	YES	YES	NO
ETF1	NC_000005.10	138506095	138543236	-	NM_004730.4	1953	138507824	3' UTR	AGACT	21	0.65	0.999986	YES	YES	hsa-miR-491-3p
ETF1	NC_000005.10	138506095	138543236	-	NM_004730.4	2130	138507647	3' UTR	TGACT	17	0.6875	0.999956	YES	YES	NO
ETF1	NC_000005.10	138506095	138543236	-	NM_004730.4	483	138517638	CDS	AGAAA	13	0.818182	0.999939	NO	NO	hsa-miR-409-3p
ETF1	NC_000005.10	138506095	138543236	-	NM_004730.4	484	138517637	CDS	GAAAG	13	0.769231	0.999915	NO	NO	hsa-miR-409-3p
TBRG4	NC_000007.14	45100100	45111697	-	NM_004749.4	215	45109128	CDS	TAAGA	23	0.869565	0.999927	NO	NO	hsa-miR-27a-5p
TBRG4	NC_000007.14	45100100	45111697	-	NM_004749.4	217	45109126	CDS	AGACT	25	0.88	0.999981	YES	YES	hsa-miR-27a-5p
STK17A	NC_000007.14	43583108	43627379	+	NM_004760.3	1442	43624903	3' UTR	GGACC	14	1	0.999989	YES	YES	hsa-let-7d-5p
STK17A	NC_000007.14	43583108	43627379	+	NM_004760.3	1698	43625159	3' UTR	AAAAT	14	0.923077	0.9999	NO	NO	NO
COPB2	NC_000003.12	139357406	139389647	-	NM_004766.3	2901	139357780	3' UTR	GGACT	16	0.8125	0.999954	YES	YES	hsa-miR-103b
LONP1	NC_000019.10	5691834	5720146	-	NM_004793.4	1168	5705985	CDS	GGAGA	11	0.777778	0.999985	NO	NO	NO
LONP1	NC_000019.10	5691834	5720146	-	NM_004793.4	2908	5692018	3' UTR	GGACT	12	0.545455	0.999941	YES	YES	NO
KIF3B	NC_000020.11	32277651	32335011	+	NM_004798.4	5263	32334158	3' UTR	AGACT	9	0.888889	0.999946	YES	YES	hsa-miR-616-5p hsa-miR-222-3p
TM9SF2	NC_000013.11	99501472	99564048	+	NM_004800.3	2130	99562761	3' UTR	AGAAG	67	0.968254	0.999993	NO	NO	hsa-miR-139-5p hsa-miR-139-5p hsa-miR-139-5p hsa-miR-139-5p hsa-miR-139-5p hsa-miR-139-5p hsa-miR-378a-3p hsa-miR-378c hsa-miR-378d hsa-miR-876-5p hsa-miR-876-5p hsa-miR-378a-3p hsa-miR-378c hsa-miR-378d hsa-miR-378i
HS6ST1	NC_000002.12	128265480	128318868	-	NM_004807.3	2647	128267056	3' UTR	GGACT	10	0.8	0.999904	YES	YES	NO
DDX23	NC_000012.12	48829756	48852163	-	NM_004818.3	2434	48830578	CDS	GGAAA	14	1	0.99997	NO	NO	hsa-miR-1285-3p
DDX23	NC_000012.12	48829756	48852163	-	NM_004818.3	2435	48830577	CDS	GAAAG	14	1	0.999981	NO	NO	hsa-miR-1285-3p
DDX23	NC_000012.12	48829756	48852163	-	NM_004818.3	2891	48830121	3' UTR	GGACC	44	0.813953	0.999996	YES	NO	hsa-miR-877-5p
ECEL1	NC_000002.12	232479827	232487834	-	NM_004826.4	591	232486280	CDS	GGACT	29	0.444444	0.999902	YES	YES	NO
ECEL1	NC_000002.12	232479827	232487834	-	NM_004826.4	837	232486034	CDS	GGACT	34	0.566667	0.999968	YES	YES	NO
GGPS1	NC_000001.11	235328570	235344532	+	NM_004837.4	1157	235342794	3' UTR	GGACC	25	0.2	0.999931	YES	YES	NO
GGPS1	NC_000001.11	235328570	235344532	+	NM_004837.4	1286	235342923	3' UTR	AGAAG	29	1	0.999987	NO	NO	hsa-miR-423-5p
GGPS1	NC_000001.11	235328570	235344532	+	NM_004837.4	1287	235342924	3' UTR	GAAGC	29	1	0.999987	NO	NO	hsa-miR-423-5p
GGPS1	NC_000001.11	235328570	235344532	+	NM_004837.4	607	235342244	CDS	GGACA	27	0.444444	0.999984	YES	YES	hsa-miR-2355-3p hsa-miR-2355-3p hsa-miR-2355-3p hsa-miR-2355-3p
GGPS1	NC_000001.11	235328570	235344532	+	NM_004837.4	694	235342331	CDS	GGACT	30	0.931034	0.999995	YES	YES	hsa-miR-132-3p hsa-miR-132-3p
IL27RA	NC_000019.10	14031762	14053218	+	NM_004843.4	2186	14052454	3' UTR	GGACC	11	0.6	0.999955	YES	YES	NO
CLTC	NC_000017.11	59619895	59696956	+	NM_004859.4	4363	59683471	CDS	TAATT	22	1	0.999935	NO	NO	NO
CLTC	NC_000017.11	59619895	59696956	+	NM_004859.4	5385	59693972	3' UTR	GGACT	32	0.65625	0.999998	YES	YES	hsa-miR-205-5p
CLTC	NC_000017.11	59619895	59696956	+	NM_004859.4	5415	59694002	3' UTR	GGATC	35	0.785714	0.999946	NO	NO	hsa-miR-26a-5p hsa-miR-26b-5p hsa-miR-376c-3p hsa-miR-26a-5p hsa-miR-26b-5p hsa-miR-4454 hsa-miR-182-3p hsa-miR-182-3p
FXR2	NC_000017.11	7591230	7614897	-	NM_004860.4	2710	7591507	3' UTR	CGACC	37	0.833333	0.999981	NO	NO	hsa-miR-10b-5p
GDF15	NC_000019.10	18386158	18389176	+	NM_004864.4	634	18388610	CDS	GGACC	18	0.3125	0.999943	YES	YES	NO
GDF15	NC_000019.10	18386158	18389176	+	NM_004864.4	943	18388919	CDS	AGACT	25	0.88	0.999997	YES	YES	hsa-miR-34a-5p hsa-miR-9-5p hsa-miR-9-5p hsa-miR-34a-5p
MPDU1	NC_000017.11	7583852	7588212	+	NM_004870.4	921	7587717	3' UTR	CCAGA	31	0.846154	0.999929	NO	NO	NO
PTGES	NC_000009.12	129738349	129753042	-	NM_004878.5	555	129739545	3' UTR	GGACT	22	0.904762	0.999986	YES	YES	NO
APBA3	NC_000019.10	3750772	3761692	-	NM_004886.4	2001	3750947	3' UTR	CCAGG	10	1	0.999913	NO	NO	NO
MINPP1	NC_000010.11	87504893	87553461	+	NM_004897.5	1302	87552293	CDS	AGACT	15	0.928571	0.999981	YES	YES	NO
MINPP1	NC_000010.11	87504893	87553461	+	NM_004897.5	1642	87552633	3' UTR	GGACA	14	0.642857	0.999952	YES	YES	hsa-miR-181b-5p
MINPP1	NC_000010.11	87504893	87553461	+	NM_004897.5	1841	87552832	3' UTR	GGACC	14	0.538462	0.999975	YES	YES	NO
APOBEC3B	NC_000022.11	38982347	38992779	+	NM_004900.5	675	38986411	CDS	TCAGA	13	1	0.999993	NO	NO	NO
IER2	NC_000019.10	13150411	13154911	+	NM_004907.3	1060	13153861	3' UTR	GGACC	72	0.264706	0.999927	YES	YES	NO
IER2	NC_000019.10	13150411	13154911	+	NM_004907.3	1217	13154018	3' UTR	GGACT	80	0.571429	0.999909	YES	YES	NO
IER2	NC_000019.10	13150411	13154911	+	NM_004907.3	1364	13154165	3' UTR	GGACT	65	0.969231	0.999999	YES	YES	NO
IER2	NC_000019.10	13150411	13154911	+	NM_004907.3	1442	13154243	3' UTR	GGACT	65	0.936508	1	YES	YES	NO
IER2	NC_000019.10	13150411	13154911	+	NM_004907.3	787	13153588	CDS	GGACT	52	0.44	0.999972	YES	YES	hsa-miR-1910-5p
PDIA4	NC_000007.14	149003062	149028505	-	NM_004911.5	560	149019004	CDS	CCAGA	12	0.7	0.999932	NO	NO	hsa-miR-330-5p hsa-miR-1180-3p hsa-miR-516b-5p hsa-miR-4664-3p hsa-miR-330-5p
AQP3	NC_000009.12	33441160	33447593	-	NM_004925.5	1106	33441879	3' UTR	GGACC	128	0.23622	0.999951	YES	YES	NO
ACTN4	NC_000019.10	38647649	38731589	+	NM_004924.6	3510	38730109	3' UTR	AAAAA	39	0.787879	0.999937	NO	NO	NO
AQP3	NC_000009.12	33441160	33447593	-	NM_004925.5	1079	33441906	3' UTR	CGAGA	91	0.890244	0.999972	NO	NO	NO
MRPL49	NC_000011.10	65122321	65127371	+	NM_004927.4	648	65125993	3' UTR	GGACT	27	0.782609	0.999974	YES	YES	hsa-miR-192-5p
CDK5	NC_000007.14	151053815	151057897	-	NM_004935.4	1086	151053851	3' UTR	GGACT	54	0.134615	0.99992	YES	NO	NO
CDKN2B	NC_000009.12	22002903	22009305	-	NM_004936.4	1030	22005726	3' UTR	TGACA	13	1	0.999981	YES	NO	NO
CDKN2B	NC_000009.12	22002903	22009305	-	NM_004936.4	1096	22005660	3' UTR	GGACC	12	0.818182	0.999992	YES	YES	NO
CDKN2B	NC_000009.12	22002903	22009305	-	NM_004936.4	1268	22005488	3' UTR	AGACT	15	0.785714	0.999956	YES	YES	NO
CDKN2B	NC_000009.12	22002903	22009305	-	NM_004936.4	427	22008879	CDS	GGACT	11	0.8	0.999907	YES	YES	NO
CDKN2B	NC_000009.12	22002903	22009305	-	NM_004936.4	672	22006084	CDS	GGACG	12	0.583333	0.999969	NO	NO	NO
CDKN2B	NC_000009.12	22002903	22009305	-	NM_004936.4	897	22005859	3' UTR	TGAGA	14	1	0.999975	NO	NO	NO
EIF4G1	NC_000003.12	184320263	184335353	+	NM_004953.5	4697	184334972	3' UTR	GGACT	8	0.625	0.999914	YES	YES	hsa-miR-139-5p hsa-miR-455-3p hsa-miR-139-5p hsa-miR-455-3p
HMGN1	NC_000021.9	39342315	39349088	-	NM_004965.7	1137	39342449	3' UTR	GGAAA	49	1	0.99999	NO	NO	NO
HNRNPF	NC_000010.11	43385618	43409186	-	NM_004966.4	986	43387242	CDS	GGACT	11	1	0.999996	YES	YES	hsa-miR-34a-5p hsa-miR-34a-5p hsa-miR-34a-5p hsa-miR-34a-5p hsa-miR-34a-5p hsa-miR-34a-5p hsa-miR-34a-5p hsa-miR-34a-5p
OXA1L	NC_000014.9	22766688	22773042	+	NM_005015.5	1368	22771604	3' UTR	AGACT	182	0.578313	0.99992	YES	YES	hsa-miR-3605-5p hsa-miR-3605-5p
OXA1L	NC_000014.9	22766688	22773042	+	NM_005015.5	1386	22771622	3' UTR	AGACT	183	0.568047	0.999917	YES	YES	hsa-miR-26a-5p hsa-miR-26a-5p hsa-miR-26b-5p hsa-miR-26b-5p
NME4	NC_000016.10	397199	400754	+	NM_005009.3	783	400537	3' UTR	GGACC	59	0.305085	0.999989	YES	YES	hsa-miR-133a-3p hsa-let-7b-5p hsa-miR-19b-3p
PIK3R2	NC_000019.10	18153163	18170532	+	NM_005027.4	3336	18169888	3' UTR	CGAGA	22	0.947368	0.999962	NO	NO	NO
PPID	NC_000004.12	158709127	158723396	-	NM_005038.3	393	158719228	CDS	GGAGA	30	0.862069	0.999992	NO	NO	NO
PSMD5	NC_000009.12	120816053	120842922	-	NM_005047.4	1614	120817820	3' UTR	AGACT	9	1	0.999941	YES	YES	hsa-miR-34a-5p
RAD23A	NC_000019.10	12945862	12953642	+	NM_005053.4	1192	12953062	3' UTR	CCAGG	40	1	0.999923	NO	NO	NO
SIAH2	NC_000003.12	150741125	150763169	-	NM_005067.7	1709	150741727	3' UTR	GGAAT	14	0.538462	0.999924	NO	NO	NO
TPD52	NC_000008.11	80034745	80171564	-	NM_005079.4	932	80037860	3' UTR	GGACA	43	0.333333	0.999951	YES	YES	NO
CCS	NC_000011.10	66593185	66606019	+	NM_005125.2	975	66605928	3' UTR	GGACT	35	0.424242	0.99993	YES	YES	NO
FGFBP1	NC_000004.12	15935577	15938740	-	NM_005130.5	385	15936543	CDS	GGACT	18	0.647059	0.999985	YES	YES	NO
FGFBP1	NC_000004.12	15935577	15938740	-	NM_005130.5	561	15936367	CDS	GGACC	13	1	0.999974	YES	YES	NO
FGFBP1	NC_000004.12	15935577	15938740	-	NM_005130.5	894	15936034	CDS	GGACC	28	0.321429	0.999968	YES	YES	NO
SCO2	NC_000022.11	50523568	50525598	-	NM_005138.3	350	50524202	CDS	GGACT	33	0.806452	0.99999	YES	YES	NO
SCO2	NC_000022.11	50523568	50525598	-	NM_005138.3	701	50523851	CDS	AGACT	30	0.857143	0.999992	YES	YES	NO
DNAJA3	NC_000016.10	4425868	4456775	+	NM_005147.6	1747	4455822	3' UTR	AGACT	9	0.777778	0.999982	YES	YES	NO
USP14	NC_000018.10	158557	214629	+	NM_005151.4	1850	211507	3' UTR	AGACA	30	0.517241	0.999994	YES	YES	hsa-miR-106a-5p
USP14	NC_000018.10	158557	214629	+	NM_005151.4	1966	211623	3' UTR	TCAGC	24	1	0.99991	NO	NO	NO
USP10	NC_000016.10	84700000	84779922	+	NM_005153.3	526	84744916	CDS	GGACA	8	1	0.999988	YES	YES	NO
ATF1	NC_000012.12	50764101	50821162	+	NM_005171.5	1057	50819807	3' UTR	GGACA	18	1	0.999985	YES	NO	hsa-miR-1283
BCL3	NC_000019.10	44748708	44760044	+	NM_005178.5	1322	44759489	CDS	GGATT	27	0.96	0.99999	NO	NO	NO
CAPN1	NC_000011.10	65181928	65212006	+	NM_005186.4	2452	65211506	3' UTR	GGACT	17	0.764706	0.999978	YES	YES	NO
CAPN1	NC_000011.10	65181928	65212006	+	NM_005186.4	2832	65211886	3' UTR	GGACT	20	0.6	0.999989	YES	YES	NO
CAPN1	NC_000011.10	65181928	65212006	+	NM_005186.4	2843	65211897	3' UTR	GGACT	21	0.619048	0.999991	YES	YES	hsa-miR-6882-5p
CEBPB	NC_000020.11	50190830	50192668	+	NM_005194.4	1283	50192112	3' UTR	AGACT	61	0.77193	0.999985	YES	YES	NO
CEBPB	NC_000020.11	50190830	50192668	+	NM_005194.4	752	50191581	CDS	GGACT	31	0.83871	0.999993	YES	YES	hsa-miR-4664-3p
CEBPD	NC_000008.11	47736913	47738164	-	NM_005195.4	1141	47737024	3' UTR	AGACT	25	0.681818	0.99997	YES	YES	hsa-miR-106a-5p
CEBPD	NC_000008.11	47736913	47738164	-	NM_005195.4	1181	47736984	3' UTR	AAAGA	55	0.803922	0.999973	NO	NO	hsa-miR-423-3p hsa-miR-423-3p
CEBPD	NC_000008.11	47736913	47738164	-	NM_005195.4	1183	47736982	3' UTR	AGACT	54	0.660377	0.999997	YES	YES	hsa-miR-423-3p hsa-miR-423-3p
CEBPD	NC_000008.11	47736913	47738164	-	NM_005195.4	874	47737291	3' UTR	AGAGA	50	0.931818	0.999927	NO	NO	hsa-let-7d-5p hsa-let-7d-5p hsa-let-7d-5p hsa-let-7e-5p hsa-let-7a-5p hsa-let-7a-5p hsa-let-7a-5p hsa-let-7d-5p hsa-let-7d-5p hsa-let-7d-5p hsa-let-7f-5p hsa-let-7i-5p hsa-let-7a-5p hsa-let-7a-5p hsa-let-7a-5p hsa-let-7d-5p hsa-let-7d-5p hsa-let-7e-5p hsa-let-7e-5p hsa-let-7f-5p hsa-let-7f-5p hsa-let-7d-5p
CEBPD	NC_000008.11	47736913	47738164	-	NM_005195.4	876	47737289	3' UTR	AGACT	48	0.844444	0.999995	YES	YES	hsa-let-7a-5p hsa-let-7b-5p hsa-let-7d-5p hsa-let-7d-5p hsa-let-7d-5p hsa-let-7e-5p hsa-let-7e-5p hsa-let-7f-5p hsa-let-7f-5p hsa-let-7g-5p hsa-let-7i-5p hsa-let-7a-5p hsa-let-7a-5p hsa-let-7a-5p hsa-let-7b-5p hsa-let-7b-5p hsa-let-7d-5p hsa-let-7d-5p hsa-let-7d-5p hsa-let-7e-5p hsa-let-7e-5p hsa-let-7f-5p hsa-let-7g-5p hsa-let-7i-5p hsa-let-7i-5p hsa-miR-21-5p hsa-let-7a-5p hsa-let-7a-5p hsa-let…
CEBPD	NC_000008.11	47736913	47738164	-	NM_005195.4	976	47737189	3' UTR	GGACA	48	0.489362	0.999968	YES	YES	hsa-let-7d-5p
NR2F6	NC_000019.10	17231883	17245919	-	NM_005234.4	2100	17232166	3' UTR	AGACT	107	0.820225	0.999912	YES	YES	NO
E2F1	NC_000020.11	33675477	33686385	-	NM_005225.3	492	33679956	CDS	GGAGA	23	0.863636	0.999996	NO	NO	NO
E2F1	NC_000020.11	33675477	33686385	-	NM_005225.3	494	33679954	CDS	AGAAG	22	0.947368	0.999958	NO	NO	NO
ELK1	NC_000023.11	47635520	47650604	-	NM_005229.4	1598	47636734	3' UTR	AGACT	9	0.666667	0.999904	YES	YES	NO
NR2F6	NC_000019.10	17231883	17245919	-	NM_005234.4	2009	17232257	3' UTR	GGACT	85	0.644737	0.999976	YES	YES	hsa-miR-28-5p hsa-miR-148b-5p hsa-miR-671-5p hsa-miR-203b-5p
NR2F6	NC_000019.10	17231883	17245919	-	NM_005234.4	2046	17232220	3' UTR	AGACT	91	0.885057	0.999999	YES	YES	hsa-miR-25-3p hsa-miR-27b-3p hsa-miR-26b-5p hsa-miR-27a-3p hsa-miR-26a-5p hsa-miR-27b-3p hsa-miR-26b-5p hsa-miR-27a-3p hsa-miR-92b-3p hsa-miR-26b-5p hsa-miR-25-3p hsa-miR-27b-3p hsa-miR-27a-3p hsa-miR-26a-5p hsa-miR-92b-3p hsa-miR-27a-3p hsa-miR-27b-3p hsa-miR-27b-3p hsa-miR-27a-3p hsa-miR-27b-3p hsa-miR-26b-5p hsa-miR-27a-3p hsa-miR-27a-3p hsa-miR-27b-3p hsa-miR-27a-3p hsa-miR-27b-3p
NR2F6	NC_000019.10	17231883	17245919	-	NM_005234.4	2239	17232027	3' UTR	GGACA	84	0.301205	0.999972	YES	YES	NO
FOS	NC_000014.9	75278828	75282230	+	NM_005252.4	1006	75281132	CDS	TGAGA	55	0.692308	0.999977	NO	NO	NO
FOS	NC_000014.9	75278828	75282230	+	NM_005252.4	1008	75281134	CDS	AGACA	46	0.780488	0.999965	YES	YES	NO
FOS	NC_000014.9	75278828	75282230	+	NM_005252.4	1060	75281186	CDS	AGACT	51	0.468085	0.999978	YES	YES	hsa-miR-27a-3p hsa-miR-27b-3p hsa-miR-152-3p hsa-miR-27a-5p
FOS	NC_000014.9	75278828	75282230	+	NM_005252.4	1454	75281580	3' UTR	GGACT	77	0.971429	0.999989	YES	YES	hsa-miR-26a-5p hsa-miR-148b-5p hsa-miR-30e-3p hsa-miR-22-5p hsa-miR-362-5p hsa-miR-30a-3p hsa-miR-27b-3p hsa-miR-26a-5p hsa-miR-26b-5p hsa-miR-26a-5p hsa-miR-26b-5p hsa-miR-30a-3p hsa-miR-30e-3p hsa-miR-26a-5p hsa-miR-148a-5p hsa-miR-27b-3p hsa-miR-125b-5p hsa-miR-26a-5p hsa-miR-26b-5p hsa-miR-221-3p
FOSL2	NC_000002.12	28392858	28417317	+	NM_005253.4	1992	28412596	3' UTR	GGACT	9	1	0.999946	YES	YES	NO
GLUD1	NC_000010.11	87050202	87094843	-	NM_005271.5	1705	87051797	CDS	TGAGA	19	0.866667	0.999953	NO	NO	NO
H1-0	NC_000022.11	37805229	37807432	+	NM_005318.4	1026	37806254	3' UTR	AGACA	53	0.265306	0.999902	YES	YES	hsa-miR-5699-3p hsa-miR-128-3p hsa-let-7b-5p
H1-0	NC_000022.11	37805229	37807432	+	NM_005318.4	2200	37807428	3' UTR	GGAGA	17	0.923077	0.999987	NO	NO	hsa-miR-92a-3p hsa-miR-92a-3p
H1-0	NC_000022.11	37805229	37807432	+	NM_005318.4	566	37805794	CDS	AGACC	52	0.307692	0.999947	YES	YES	hsa-miR-9-5p
H1-0	NC_000022.11	37805229	37807432	+	NM_005318.4	800	37806028	CDS	AGACT	57	0.964286	0.999999	YES	YES	hsa-miR-34a-5p hsa-miR-34a-5p hsa-miR-34a-5p hsa-miR-34a-5p hsa-miR-34a-5p hsa-miR-34a-5p hsa-miR-34a-5p hsa-miR-34a-5p hsa-miR-221-3p hsa-miR-221-3p hsa-miR-222-3p
H1-0	NC_000022.11	37805229	37807432	+	NM_005318.4	923	37806151	3' UTR	GGACA	39	0.871795	0.999983	YES	YES	hsa-miR-574-5p hsa-miR-141-3p hsa-miR-221-3p hsa-miR-96-5p
HADH	NC_000004.12	107989889	108035171	+	NM_005327.7	1163	108034531	3' UTR	ATAGA	36	0.806452	0.999962	NO	NO	NO
HSPA1A	NC_000006.12	31815543	31817942	+	NM_005345.6	2182	31817724	3' UTR	AGACT	101	0.46875	0.999961	YES	YES	hsa-miR-130a-3p hsa-miR-130b-3p hsa-miR-301a-3p hsa-miR-301b-3p hsa-miR-454-3p hsa-miR-454-3p hsa-miR-301a-3p hsa-miR-130a-3p hsa-miR-130b-3p hsa-miR-301b-3p hsa-miR-454-3p hsa-miR-130a-3p hsa-miR-454-3p hsa-miR-130a-3p hsa-miR-130b-3p hsa-miR-301b-3p hsa-miR-454-3p
HSPA5	NC_000009.12	125234853	125241343	-	NM_005347.5	2221	125236553	3' UTR	GGACT	341	0.960725	1	YES	YES	hsa-miR-125b-5p hsa-miR-125a-5p hsa-miR-378a-5p
HRAS	NC_000011.10	532242	535576	-	NM_005343.4	955	532357	3' UTR	AGACT	27	0.851852	0.999995	YES	YES	hsa-miR-183-5p hsa-miR-182-5p hsa-miR-26a-5p hsa-miR-182-5p hsa-miR-183-5p hsa-miR-132-3p hsa-miR-182-5p hsa-miR-182-5p hsa-miR-183-5p hsa-miR-335-5p
HSPA1A	NC_000006.12	31815543	31817942	+	NM_005345.6	1569	31817111	CDS	AGACA	65	0.359375	0.999909	YES	YES	hsa-miR-3613-5p hsa-miR-6766-3p hsa-miR-6830-3p
HSPA1A	NC_000006.12	31815543	31817942	+	NM_005345.6	1929	31817471	CDS	GGACA	95	0.157895	0.999924	YES	YES	hsa-miR-34a-5p hsa-miR-96-5p hsa-miR-1271-5p hsa-miR-338-3p hsa-miR-338-3p
HSPA1A	NC_000006.12	31815543	31817942	+	NM_005345.6	543	31816085	CDS	GGAGA	23	0.909091	0.999991	NO	NO	NO
HSPA1A	NC_000006.12	31815543	31817942	+	NM_005345.6	909	31816451	CDS	GGACT	44	0.783784	0.999928	YES	NO	hsa-miR-106b-5p hsa-miR-148a-5p hsa-miR-17-5p hsa-miR-19a-3p hsa-miR-19b-3p hsa-miR-20a-5p hsa-miR-93-5p
HSP90AA1	NC_000014.9	102080742	102087044	-	NM_005348.4	496	102085850	CDS	TGAGA	81	0.973684	0.999919	NO	NO	hsa-miR-139-5p hsa-miR-335-3p
HSP90AA1	NC_000014.9	102080742	102087044	-	NM_005348.4	498	102085848	CDS	AGAAA	75	0.971429	0.999996	NO	NO	hsa-miR-139-5p hsa-miR-101-3p hsa-miR-335-3p
HSP90AA1	NC_000014.9	102080742	102087044	-	NM_005348.4	499	102085847	CDS	GAAAG	67	0.953125	0.999994	NO	NO	hsa-miR-23b-3p hsa-miR-23b-3p hsa-miR-101-3p hsa-miR-23b-3p hsa-miR-23b-3p hsa-miR-335-3p hsa-miR-23a-3p
JUND	NC_000019.10	18279694	18281622	-	NM_005354.6	1258	18280365	3' UTR	GGACT	54	0.921569	0.999995	YES	YES	NO
JUND	NC_000019.10	18279694	18281622	-	NM_005354.6	1362	18280261	3' UTR	GGACT	37	0.59375	0.999933	YES	YES	hsa-miR-21-5p
JUND	NC_000019.10	18279694	18281622	-	NM_005354.6	929	18280694	CDS	GGACA	30	0.758621	0.999995	YES	YES	NO
RAB8A	NC_000019.10	16111889	16134234	+	NM_005370.5	1723	16133390	3' UTR	GGACT	18	0.875	0.999988	YES	YES	hsa-miR-454-3p
RAB8A	NC_000019.10	16111889	16134234	+	NM_005370.5	1735	16133402	3' UTR	GGACC	19	0.315789	0.999948	YES	YES	NO
NBL1	NC_000001.11	19644311	19658452	+	NM_005380.8	825	19657253	3' UTR	GGACT	12	0.727273	0.99998	YES	YES	NO
PDCL	NC_000009.12	122818097	122828588	-	NM_005388.5	911	122820203	CDS	GGACC	9	0.777778	0.999925	YES	YES	hsa-miR-140-3p
ROCK1	NC_000018.10	20946906	21111813	-	NM_005406.3	5548	20950804	3' UTR	GGACT	13	0.545455	0.999984	YES	YES	hsa-miR-26b-5p hsa-miR-26b-5p hsa-miR-130a-3p
SLC20A1	NC_000002.12	112645939	112663825	+	NM_005415.5	2534	112663062	3' UTR	GGACC	19	0.388889	0.999975	YES	YES	NO
ZBTB22	NC_000006.12	33314418	33317744	-	NM_005453.5	1590	33315488	CDS	GGACT	8	0.714286	0.999912	YES	NO	NO
ZRANB2	NC_000001.11	71063291	71081035	-	NM_005455.5	1066	71065116	3' UTR	GGATC	20	0.764706	0.999931	NO	NO	hsa-miR-6812-5p
MED6	NC_000014.9	70583221	70600655	-	NM_005466.4	110	70597708	CDS	GGATT	30	0.76	0.999975	NO	NO	hsa-miR-106a-5p hsa-miR-106b-5p hsa-miR-488-3p hsa-miR-548ay-5p hsa-miR-548d-5p hsa-miR-106b-5p
DNAJB6	NC_000007.14	157337004	157386324	+	NM_005494.3	1051	157385804	3' UTR	AGACT	61	0.857143	0.999936	YES	YES	NO
SMC4	NC_000003.12	160400559	160434953	+	NM_005496.3	4126	160433800	CDS	GGACT	19	0.578947	0.999934	YES	YES	hsa-miR-17-5p hsa-miR-20b-5p hsa-miR-93-5p hsa-miR-3065-5p hsa-miR-3529-3p
SAE1	NC_000019.10	47130835	47210636	+	NM_005500.3	1541	47209655	3' UTR	GGACT	29	0.555556	0.999988	YES	YES	NO
SCARB1	NC_000012.12	124776856	124863864	-	NM_005505.5	1906	124778355	3' UTR	GGACT	57	0.716981	0.999944	YES	NO	hsa-miR-148b-5p
SCARB1	NC_000012.12	124776856	124863864	-	NM_005505.5	2153	124778108	3' UTR	GGACT	52	0.891304	0.999985	YES	NO	NO
SCARB1	NC_000012.12	124776856	124863864	-	NM_005505.5	2301	124777960	3' UTR	GGACT	53	0.686275	0.999992	YES	NO	hsa-miR-17-5p hsa-miR-1180-3p
SCARB1	NC_000012.12	124776856	124863864	-	NM_005505.5	2388	124777873	3' UTR	GGACT	51	0.925	0.999981	YES	NO	NO
SCARB2	NC_000004.12	76158737	76213824	-	NM_005506.4	445	76195818	CDS	GAAGC	7	0.833333	0.9999	NO	NO	NO
HSF1	NC_000008.11	144291604	144314720	+	NM_005526.4	1984	144314570	3' UTR	GGACT	23	0.526316	0.999963	YES	YES	hsa-let-7c-5p
HSF1	NC_000008.11	144291604	144314720	+	NM_005526.4	2118	144314704	3' UTR	AAACA	28	1	0.999956	YES	NO	hsa-let-7c-5p
IFNGR2	NC_000021.9	33403413	33437516	+	NM_005534.4	1219	33437036	3' UTR	GGACT	19	0.842105	0.999998	YES	YES	NO
STMN1	NC_000001.11	25900116	25906419	-	NM_005563.4	594	25900965	3' UTR	AGACT	216	0.47449	0.999941	YES	YES	hsa-let-7f-2-3p hsa-miR-199a-3p hsa-miR-148a-3p hsa-miR-148a-3p hsa-miR-148b-3p hsa-miR-9-5p hsa-miR-130b-3p hsa-miR-148b-3p hsa-miR-130a-3p hsa-miR-222-3p hsa-miR-148b-3p hsa-miR-130b-3p hsa-miR-301b-3p hsa-miR-148a-3p hsa-miR-9-5p hsa-miR-130b-3p hsa-miR-148a-3p hsa-miR-148b-3p hsa-miR-148b-3p hsa-miR-9-5p hsa-miR-9-5p hsa-miR-9-5p
KARS1	NC_000016.10	75627724	75647665	-	NM_005548.3	1228	75631466	CDS	TGAGA	65	0.966667	0.999993	NO	NO	hsa-miR-26a-5p hsa-miR-26a-5p hsa-miR-27a-5p
KARS1	NC_000016.10	75627724	75647665	-	NM_005548.3	1230	75631464	CDS	AGAAA	64	0.912281	0.999995	NO	NO	hsa-miR-6764-5p hsa-miR-1266-5p hsa-miR-27a-5p
KARS1	NC_000016.10	75627724	75647665	-	NM_005548.3	1231	75631463	CDS	GAAAG	62	0.894737	0.999967	NO	NO	hsa-miR-6764-5p hsa-miR-1266-5p hsa-miR-2355-5p hsa-miR-27a-5p
KRT7	NC_000012.12	52233243	52248921	+	NM_005556.4	1621	52248917	3' UTR	TGATC	54	0.5625	0.999974	NO	NO	NO
LGALS3BP	NC_000017.11	78971255	78979923	-	NM_005567.4	1100	78972357	CDS	GGACA	159	0.85034	0.999942	YES	YES	NO
LGALS3BP	NC_000017.11	78971255	78979923	-	NM_005567.4	1510	78971947	CDS	AGACT	219	0.557895	0.999914	YES	YES	NO
LGALS3BP	NC_000017.11	78971255	78979923	-	NM_005567.4	1877	78971580	CDS	GGACT	245	0.848101	0.999998	YES	YES	NO
LGALS3BP	NC_000017.11	78971255	78979923	-	NM_005567.4	908	78972549	CDS	GGACC	165	0.4875	0.999977	YES	YES	NO
LGALS3BP	NC_000017.11	78971255	78979923	-	NM_005567.4	389	78974798	CDS	GGATG	55	0.981132	0.999982	NO	NO	NO
BCAM	NC_000019.10	44809103	44821421	+	NM_005581.5	2293	44821305	3' UTR	GGATT	25	1	0.999982	NO	NO	hsa-miR-128-3p hsa-miR-199a-5p
LGMN	NC_000014.9	92703809	92748627	-	NM_005606.7	887	92711847	CDS	AGATT	20	1	0.99999	NO	NO	NO
RTN2	NC_000019.10	45485294	45497047	-	NM_005619.5	2012	45485556	3' UTR	TAATT	29	1	0.999994	NO	NO	hsa-miR-196a-5p hsa-miR-196b-5p
RTN2	NC_000019.10	45485294	45497047	-	NM_005619.5	2103	45485465	3' UTR	GGACT	33	0.848485	0.999994	YES	YES	hsa-miR-6882-5p
SGK1	NC_000006.12	134169256	134174866	-	NM_005627.4	1342	134170281	CDS	GGACT	62	0.789474	0.999984	YES	YES	hsa-miR-940
SLC1A5	NC_000019.10	46774883	46788594	-	NM_005628.3	2300	46775465	3' UTR	GGACA	40	0.95	0.999989	YES	YES	hsa-miR-130b-3p
SLC1A5	NC_000019.10	46774883	46788594	-	NM_005628.3	757	46787838	CDS	GGACC	23	0.304348	0.999955	YES	YES	NO
SLC1A5	NC_000019.10	46774883	46788594	-	NM_005628.3	836	46787759	CDS	GGACT	22	0.952381	0.99999	YES	YES	hsa-miR-1910-5p
TAF7	NC_000005.10	141318490	141320784	-	NM_005642.3	1821	141318964	3' UTR	AGACT	33	0.59375	0.999939	YES	YES	NO
TAF7	NC_000005.10	141318490	141320784	-	NM_005642.3	470	141320315	5'UTR	GGACT	23	0.826087	0.99995	YES	YES	NO
TAF7	NC_000005.10	141318490	141320784	-	NM_005642.3	563	141320222	5'UTR	AGACT	21	0.8	0.999934	YES	YES	NO
TAF11	NC_000006.12	34877462	34888042	-	NM_005643.4	785	34878526	3' UTR	AGACT	14	0.916667	0.999988	YES	YES	hsa-miR-454-3p hsa-miR-454-3p
TAF11	NC_000006.12	34877462	34888042	-	NM_005643.4	923	34878388	3' UTR	GGACC	13	0.666667	0.999992	YES	YES	NO
UFD1	NC_000022.11	19449911	19479193	-	NM_005659.7	1023	19450679	CDS	AGAAA	39	0.942857	0.999983	NO	NO	hsa-miR-3158-3p
UFD1	NC_000022.11	19449911	19479193	-	NM_005659.7	1024	19450678	CDS	GAAAG	38	0.941176	0.999922	NO	NO	hsa-miR-3158-3p
PSCA	NC_000008.11	142680495	142682725	+	NM_005672.5	819	142682562	3' UTR	GGACT	177	0.789474	0.999984	YES	YES	hsa-miR-423-3p
PSCA	NC_000008.11	142680495	142682725	+	NM_005672.5	975	142682718	3' UTR	GGATA	31	0.869565	0.999904	NO	NO	NO
DGCR6	NC_000022.11	18906320	18912088	+	NM_005675.6	853	18911824	3' UTR	GGACT	21	0.47619	0.999995	YES	NO	NO
SCAMP3	NC_000001.11	155255981	155262360	-	NM_005698.4	1325	155256201	3' UTR	GGACT	30	0.333333	0.999938	YES	NO	NO
ERAL1	NC_000017.11	28855016	28861061	+	NM_005702.4	1006	28858990	CDS	CCAGG	41	0.75	0.999967	NO	NO	hsa-miR-22-3p hsa-miR-149-5p
TSSC4	NC_000011.10	2400750	2403876	+	NM_005706.4	333	2402737	CDS	GGACT	10	0.9	0.999909	YES	YES	hsa-let-7e-5p hsa-let-7g-5p hsa-let-7i-5p hsa-miR-148b-5p hsa-let-7e-5p hsa-let-7g-5p hsa-let-7i-5p hsa-let-7g-5p hsa-let-7e-5p hsa-let-7e-5p hsa-let-7e-5p hsa-let-7g-5p hsa-let-7g-5p hsa-let-7i-5p hsa-let-7i-5p
GIPC1	NC_000019.10	14477762	14496127	-	NM_005716.4	1407	14478276	3' UTR	CCAGG	16	1	0.99995	NO	NO	NO
ACTR2	NC_000002.12	65227831	65271253	+	NM_005722.4	3337	65270807	3' UTR	ATAAT	19	0.714286	0.999903	NO	NO	NO
TSFM	NC_000012.12	57782787	57797587	+	NM_005726.6	1041	57796631	3' UTR	GGACA	52	0.431373	0.999984	YES	NO	NO
TSFM	NC_000012.12	57782787	57797587	+	NM_005726.6	941	57796531	CDS	AGACT	70	0.705882	0.999997	YES	NO	hsa-miR-142-5p hsa-miR-20a-5p hsa-miR-20b-5p
PPIF	NC_000010.11	79347469	79355334	+	NM_005729.4	685	79353823	CDS	AGACT	54	0.903846	0.999967	YES	YES	hsa-miR-193b-3p hsa-miR-27b-3p hsa-miR-27a-3p hsa-miR-193a-3p hsa-miR-7-1-3p hsa-miR-101-3p hsa-miR-101-3p hsa-miR-193a-3p hsa-miR-193b-3p hsa-miR-101-3p hsa-miR-139-5p hsa-miR-193a-3p hsa-miR-101-3p hsa-miR-139-5p hsa-miR-193a-3p hsa-miR-101-3p hsa-miR-148b-5p hsa-miR-128-3p hsa-miR-128-3p
PPIF	NC_000010.11	79347469	79355334	+	NM_005729.4	862	79354000	3' UTR	CCAGG	33	0.8125	0.999995	NO	NO	hsa-miR-221-5p hsa-miR-193b-3p hsa-miR-7-5p
PPIF	NC_000010.11	79347469	79355334	+	NM_005729.4	929	79354067	3' UTR	GGACA	51	0.64	0.999992	YES	YES	NO
ARPC2	NC_000002.12	218217397	218254348	+	NM_005731.3	1150	218254088	3' UTR	AGACT	40	0.333333	0.999921	YES	YES	hsa-miR-1264 hsa-miR-6514-5p
ACTR1B	NC_000002.12	97655939	97664044	-	NM_005735.4	2114	97656029	3' UTR	TAATT	11	0.909091	0.99999	NO	NO	hsa-miR-653-5p
ARL4A	NC_000007.14	12687633	12690958	+	NM_005738.5	210	12688279	CDS	AGACT	10	0.7	0.999982	YES	YES	hsa-miR-196a-5p hsa-miR-320a-3p hsa-miR-320c hsa-miR-320a-3p hsa-miR-320c hsa-miR-320a-3p hsa-miR-320c
ARL4A	NC_000007.14	12687633	12690958	+	NM_005738.5	487	12688556	CDS	GGACT	9	0.888889	0.999949	YES	YES	hsa-miR-320a-3p
TOB1	NC_000017.11	50862223	50866354	-	NM_005749.4	545	50863916	CDS	AGACT	19	0.833333	0.999991	YES	YES	hsa-miR-335-3p
TOB1	NC_000017.11	50862223	50866354	-	NM_005749.4	637	50863824	CDS	GGACC	17	0.8125	0.999908	YES	YES	hsa-miR-4705 hsa-miR-653-3p hsa-miR-653-3p
TOB1	NC_000017.11	50862223	50866354	-	NM_005749.4	764	50863697	CDS	GGACC	17	0.875	0.999982	YES	YES	hsa-miR-141-5p hsa-miR-653-3p
CEBPZ	NC_000002.12	37201612	37231596	-	NM_005760.3	1251	37227971	CDS	AGACA	10	0.7	0.999911	YES	YES	hsa-miR-17-5p hsa-miR-186-5p hsa-miR-20a-5p hsa-miR-106a-5p hsa-miR-17-5p hsa-miR-20a-5p hsa-miR-93-5p hsa-miR-106a-5p hsa-miR-17-5p hsa-miR-20a-5p hsa-miR-93-5p
ATP6AP2	NC_000023.11	40580970	40606848	+	NM_005765.3	1846	40606452	3' UTR	GGACA	96	0.322581	0.999908	YES	YES	NO
RCL1	NC_000009.12	4792944	4861066	+	NM_005772.5	1417	4860422	3' UTR	AAAGA	11	1	0.999966	NO	NO	NO
RCL1	NC_000009.12	4792944	4861066	+	NM_005772.5	1788	4860793	3' UTR	AGACT	11	0.818182	0.999989	YES	YES	NO
TXNDC9	NC_000002.12	99318982	99336333	-	NM_005783.4	538	99322107	CDS	AGACT	48	0.533333	0.999968	YES	YES	NO
ALG3	NC_000003.12	184242301	184248962	-	NM_005787.6	1326	184242527	CDS	CAAGA	20	0.882353	0.999974	NO	NO	NO
ALG3	NC_000003.12	184242301	184248962	-	NM_005787.6	1328	184242525	CDS	AGAAA	18	0.928571	0.999975	NO	NO	NO
ALG3	NC_000003.12	184242301	184248962	-	NM_005787.6	1396	184242457	3' UTR	GGACT	27	0.307692	0.999977	YES	YES	NO
DDX39A	NC_000019.10	14408798	14419341	-	NM_005804.4	219	14413078	CDS	GGACT	28	0.62963	0.999995	YES	YES	hsa-miR-191-5p
DDX39A	NC_000019.10	14408798	14419341	-	NM_005804.4	258	14413039	CDS	GGACT	28	0.653846	0.99998	YES	YES	NO
PLIN3	NC_000019.10	4838341	4867667	-	NM_005817.5	1333	4839240	CDS	GGACC	41	0.15	0.999962	YES	YES	hsa-miR-18a-5p hsa-miR-486-3p
PLIN3	NC_000019.10	4838341	4867667	-	NM_005817.5	1356	4839217	CDS	TGAGA	28	0.777778	0.999997	NO	NO	hsa-miR-139-5p
PLIN3	NC_000019.10	4838341	4867667	-	NM_005817.5	1358	4839215	CDS	AGAAA	28	0.84	0.999996	NO	NO	hsa-miR-139-5p
PLIN3	NC_000019.10	4838341	4867667	-	NM_005817.5	1359	4839214	CDS	GAAAG	27	0.826087	0.999992	NO	NO	NO
PLIN3	NC_000019.10	4838341	4867667	-	NM_005817.5	1396	4839177	3' UTR	GGACT	45	0.568182	0.99998	YES	YES	NO
PLIN3	NC_000019.10	4838341	4867667	-	NM_005817.5	2072	4838501	3' UTR	GGACT	44	0.560976	0.999962	YES	YES	hsa-miR-26b-5p
SLC35B1	NC_000017.11	49700943	49707964	-	NM_005827.4	1128	49701430	3' UTR	AGAAT	26	0.56	0.999966	NO	NO	hsa-miR-21-5p
SLC35B1	NC_000017.11	49700943	49707964	-	NM_005827.4	1175	49701383	3' UTR	GGACT	25	0.458333	0.999976	YES	YES	NO
MRPS31	NC_000013.11	40729128	40771190	-	NM_005830.4	345	40766895	CDS	AAAGA	21	0.777778	0.999932	NO	NO	NO
MRPS31	NC_000013.11	40729128	40771190	-	NM_005830.4	347	40766893	CDS	AGACT	21	0.666667	0.999989	YES	YES	NO
POP7	NC_000007.14	100706121	100707486	+	NM_005837.3	624	100707260	3' UTR	AAAGA	87	0.864198	0.99999	NO	NO	NO
POP7	NC_000007.14	100706121	100707486	+	NM_005837.3	626	100707262	3' UTR	AGACA	87	0.768293	0.999999	YES	YES	NO
SF3B4	NC_000001.11	149923317	149927803	-	NM_005850.5	1257	149923604	CDS	CCAGA	54	0.837209	0.999961	NO	NO	hsa-miR-193a-5p
SF3B4	NC_000001.11	149923317	149927803	-	NM_005850.5	367	149926759	CDS	GGACC	40	0.225	0.999916	YES	YES	hsa-miR-1285-5p hsa-miR-1266-5p hsa-let-7b-5p hsa-let-7b-5p hsa-let-7b-5p hsa-let-7b-5p
SF3B4	NC_000001.11	149923317	149927803	-	NM_005850.5	448	149926678	CDS	GGACC	47	0.76087	0.999998	YES	YES	hsa-miR-203b-5p hsa-miR-597-5p hsa-miR-597-5p
ZMPSTE24	NC_000001.11	40258236	40294180	+	NM_005857.5	1325	40292530	CDS	AGACT	11	0.777778	0.999984	YES	YES	NO
FSTL3	NC_000019.10	676392	683385	+	NM_005860.3	2100	682984	3' UTR	CCAGG	54	0.9375	0.999936	NO	NO	NO
FSTL3	NC_000019.10	676392	683385	+	NM_005860.3	2496	683380	3' UTR	AGACT	29	0.464286	0.999963	YES	YES	NO
FSTL3	NC_000019.10	676392	683385	+	NM_005860.3	940	681824	3' UTR	GGACC	26	0.5	0.999978	YES	YES	hsa-miR-4454
STUB1	NC_000016.10	680410	682801	+	NM_005861.4	1147	682608	3' UTR	GGACT	91	0.842697	1	YES	YES	NO
STUB1	NC_000016.10	680410	682801	+	NM_005861.4	1154	682615	3' UTR	GGACT	93	0.705882	0.99998	YES	YES	hsa-miR-132-3p hsa-miR-212-3p hsa-miR-132-3p
BCAS2	NC_000001.11	114567557	114581615	-	NM_005872.3	616	114568216	CDS	GGACT	65	0.28125	0.999908	YES	YES	hsa-miR-101-3p hsa-miR-101-3p
EIF1B	NC_000003.12	40309707	40312424	+	NM_005875.3	670	40312107	3' UTR	GGACT	40	0.583333	0.999994	YES	YES	hsa-miR-106b-5p hsa-miR-186-5p hsa-miR-106a-5p hsa-miR-106a-5p hsa-miR-106b-5p hsa-miR-186-5p hsa-miR-106b-5p
DNAJA2	NC_000016.10	46955362	46973674	-	NM_005880.4	1444	46956926	3' UTR	GGACA	26	0.32	0.999921	YES	YES	NO
BCKDK	NC_000016.10	31108386	31112791	+	NM_005881.4	1641	31112396	3' UTR	GGACT	18	0.888889	0.999983	YES	YES	NO
ACAT2	NC_000006.12	159762045	159779112	+	NM_005891.3	243	159767014	CDS	GCAGA	35	0.857143	0.999905	NO	NO	NO
MAT2A	NC_000002.12	85539168	85545281	+	NM_005911.6	2191	85544655	3' UTR	CCAGA	36	0.71875	0.999948	NO	NO	hsa-miR-372-3p hsa-miR-423-3p
MCM7	NC_000007.14	100092728	100101397	-	NM_005916.5	1000	100097922	CDS	GAAGC	72	1	0.999994	NO	NO	hsa-miR-3158-3p hsa-miR-1180-3p hsa-miR-30e-3p
MFAP1	NC_000015.10	43804492	43824690	-	NM_005926.3	1549	43804986	3' UTR	GGACT	18	1	0.999986	YES	YES	hsa-miR-34a-5p hsa-miR-34a-5p hsa-miR-34a-5p
MFAP1	NC_000015.10	43804492	43824690	-	NM_005926.3	1611	43804924	3' UTR	GGACT	43	0.744186	0.999994	YES	YES	NO
MFAP1	NC_000015.10	43804492	43824690	-	NM_005926.3	1732	43804803	3' UTR	GGACT	33	0.375	0.999903	YES	YES	hsa-miR-132-3p hsa-miR-589-3p hsa-miR-132-3p hsa-miR-589-3p hsa-miR-132-3p
MTHFD1	NC_000014.9	64388353	64460025	+	NM_005956.4	1534	64431826	CDS	TGAGA	30	0.807692	0.999975	NO	NO	hsa-miR-146a-5p hsa-miR-589-5p hsa-miR-146a-5p hsa-miR-589-5p
PRCC	NC_000001.11	156767535	156800815	+	NM_005973.5	126	156767660	5'UTR	GGACT	14	0.769231	0.999943	YES	YES	NO
PRCC	NC_000001.11	156767535	156800815	+	NM_005973.5	820	156786674	CDS	AGACT	20	0.588235	0.999916	YES	YES	hsa-miR-141-5p
PTK6	NC_000020.11	63528001	63537376	-	NM_005975.4	1479	63529475	3' UTR	GGACC	13	0.416667	0.999941	YES	YES	NO
CCT3	NC_000001.11	156308968	156338292	-	NM_005998.5	858	156318877	CDS	GGAGA	205	0.983784	0.999969	NO	NO	NO
TBX3	NC_000012.12	114670255	114684175	-	NM_005996.4	2975	114672013	CDS	GGACT	10	0.8	0.99997	YES	NO	NO
TBX3	NC_000012.12	114670255	114684175	-	NM_005996.4	3627	114671361	3' UTR	GGACT	13	0.615385	0.999965	YES	NO	hsa-miR-454-3p
VPS72	NC_000001.11	151176304	151190197	-	NM_005997.3	1069	151176746	CDS	GGACT	63	0.816667	0.999997	YES	YES	hsa-miR-34a-5p hsa-miR-34a-5p hsa-miR-34a-5p hsa-miR-34a-5p hsa-miR-34a-5p
VPS72	NC_000001.11	151176304	151190197	-	NM_005997.3	984	151176831	CDS	GGACC	67	0.121212	0.999904	YES	YES	hsa-miR-34a-5p hsa-miR-194-5p hsa-miR-194-5p hsa-miR-194-5p
TSNAX	NC_000001.11	231528669	231566524	+	NM_005999.3	1857	231565747	3' UTR	AGAAA	9	1	0.999925	NO	NO	NO
TUBA4A	NC_000002.12	219249710	219253918	-	NM_006000.3	1094	219250665	CDS	GGACT	134	0.96	0.999984	YES	YES	NO
TUBA4A	NC_000002.12	219249710	219253918	-	NM_006000.3	812	219250947	CDS	GGACC	110	0.560748	0.999985	YES	YES	hsa-miR-23a-3p hsa-miR-23b-3p
UQCRFS1	NC_000019.10	29205320	29213151	-	NM_006003.3	623	29207783	CDS	GGACC	167	0.481481	0.999993	YES	YES	NO
UQCRFS1	NC_000019.10	29205320	29213151	-	NM_006003.3	862	29207544	3' UTR	AGACT	243	0.847926	0.999936	YES	YES	NO
UQCRFS1	NC_000019.10	29205320	29213151	-	NM_006003.3	868	29207538	3' UTR	GGACT	243	0.934783	0.999998	YES	YES	NO
TUBA1A	NC_000012.12	49184795	49189080	-	NM_006009.4	1610	49184857	3' UTR	TTACA	35	0.870968	0.999968	NO	NO	hsa-miR-194-5p hsa-miR-16-5p hsa-miR-194-5p hsa-miR-16-5p hsa-miR-194-5p
TUBA1A	NC_000012.12	49184795	49189080	-	NM_006009.4	591	49185876	CDS	AGAAG	78	0.878378	0.999993	NO	NO	hsa-miR-378a-3p hsa-miR-876-5p
CD164	NC_000006.12	109366514	109382467	-	NM_006016.6	686	109368848	3' UTR	ACAGA	11	1	0.999928	NO	NO	NO
CD164	NC_000006.12	109366514	109382467	-	NM_006016.6	688	109368846	3' UTR	AGACC	16	0.692308	0.999981	YES	YES	NO
TSC22D1	NC_000013.11	44432143	44436858	-	NM_006022.4	1070	44434221	3' UTR	GGACT	68	0.551724	0.999951	YES	YES	NO
TSC22D1	NC_000013.11	44432143	44436858	-	NM_006022.4	1122	44434169	3' UTR	AAAGA	68	0.789474	0.99996	NO	NO	NO
TSC22D1	NC_000013.11	44432143	44436858	-	NM_006022.4	1124	44434167	3' UTR	AGACT	70	0.686567	0.999989	YES	YES	NO
TSC22D1	NC_000013.11	44432143	44436858	-	NM_006022.4	1271	44434020	3' UTR	GGACC	79	0.139241	0.999906	YES	YES	NO
TSC22D1	NC_000013.11	44432143	44436858	-	NM_006022.4	653	44434638	CDS	GGACC	58	0.381818	0.999923	YES	YES	hsa-miR-27a-5p hsa-miR-125a-5p hsa-miR-210-3p hsa-miR-4454
TSC22D1	NC_000013.11	44432143	44436858	-	NM_006022.4	779	44434512	3' UTR	AGACG	73	0.289855	0.999935	NO	YES	NO
TSC22D1	NC_000013.11	44432143	44436858	-	NM_006022.4	784	44434507	3' UTR	TGAGA	73	0.957746	0.999993	NO	NO	NO
TSC22D1	NC_000013.11	44432143	44436858	-	NM_006022.4	786	44434505	3' UTR	AGACT	70	0.928571	0.999998	YES	YES	NO
TSC22D1	NC_000013.11	44432143	44436858	-	NM_006022.4	904	44434387	3' UTR	GGACC	70	0.428571	0.999975	YES	YES	hsa-miR-153-3p
H1-10	NC_000003.12	129314771	129316286	-	NM_006026.4	137	129316150	5'UTR	GGACT	65	0.703125	0.999996	YES	YES	NO
PNMA1	NC_000014.9	73711783	73714384	-	NM_006029.5	2086	73712299	3' UTR	GGACA	18	0.555556	0.999939	YES	YES	hsa-miR-100-5p
MRC2	NC_000017.11	62627670	62693597	+	NM_006039.5	5600	62693478	3' UTR	GGACT	29	0.275862	0.99991	YES	YES	NO
MRC2	NC_000017.11	62627670	62693597	+	NM_006039.5	5662	62693540	3' UTR	AAAAA	23	0.85	0.999974	NO	NO	NO
MRC2	NC_000017.11	62627670	62693597	+	NM_006039.5	5663	62693541	3' UTR	AAAAA	23	0.909091	0.999995	NO	NO	NO
MRC2	NC_000017.11	62627670	62693597	+	NM_006039.5	5664	62693542	3' UTR	AAAAA	20	0.9	0.999904	NO	NO	NO
RTN3	NC_000011.10	63681500	63759882	+	NM_006054.4	1034	63758387	3' UTR	GGACT	40	0.717949	0.999972	YES	YES	hsa-miR-181a-3p hsa-miR-148b-3p
RTN3	NC_000011.10	63681500	63759882	+	NM_006054.4	778	63756146	CDS	AGATC	59	0.7	0.999923	NO	NO	hsa-miR-345-5p
EMC8	NC_000016.10	85778624	85799544	-	NM_006067.5	1100	85779490	3' UTR	GGACT	59	0.545455	0.999934	YES	YES	hsa-miR-30c-1-3p
TFG	NC_000003.12	100709494	100748964	+	NM_006070.6	1459	100748516	CDS	GGACC	42	0.190476	0.999926	YES	YES	hsa-miR-103b
TFG	NC_000003.12	100709494	100748964	+	NM_006070.6	1528	100748585	3' UTR	AGACT	52	0.466667	0.999967	YES	YES	NO
NDRG1	NC_000008.11	133237175	133297252	-	NM_006096.4	1349	133238851	3' UTR	GGACT	13	0.916667	0.999957	YES	YES	NO
PIAS3	NC_000001.11	145848522	145859081	-	NM_006099.3	2514	145848910	3' UTR	GGACT	16	0.4375	0.999981	YES	YES	hsa-miR-19b-3p hsa-miR-19b-3p hsa-miR-19a-3p hsa-miR-19b-3p hsa-miR-19a-3p hsa-miR-19b-3p
PPIE	NC_000001.11	39738882	39756769	+	NM_006112.4	1216	39753646	3' UTR	GGACT	31	0.592593	0.999989	YES	YES	NO
SFN	NC_000001.11	26863149	26864456	+	NM_006142.5	942	26864090	3' UTR	GGACT	374	0.604651	0.999967	YES	YES	hsa-miR-340-3p
CAPZA1	NC_000001.11	112619832	112671616	+	NM_006135.3	2151	112671409	3' UTR	AAAAA	26	0.809524	0.999908	NO	NO	NO
CAPZA2	NC_000007.14	116862587	116922049	+	NM_006136.3	499	116906310	CDS	ATAGA	28	0.904762	0.999964	NO	NO	NO
DNAJB1	NC_000019.10	14514769	14518397	-	NM_006145.3	1102	14515909	3' UTR	GGACC	41	0.780488	0.999997	YES	YES	NO
DNAJB1	NC_000019.10	14514769	14518397	-	NM_006145.3	1129	14515882	3' UTR	GGACC	49	0.695652	0.99999	YES	YES	NO
DNAJB1	NC_000019.10	14514769	14518397	-	NM_006145.3	1148	14515863	3' UTR	GGACC	32	0.766667	0.999996	YES	YES	NO
DNAJB1	NC_000019.10	14514769	14518397	-	NM_006145.3	1871	14515140	3' UTR	GGACT	26	0.875	0.999998	YES	YES	hsa-miR-7-5p hsa-miR-9-5p
DNAJB1	NC_000019.10	14514769	14518397	-	NM_006145.3	425	14516881	CDS	GGACA	48	0.978261	0.999992	YES	YES	NO
PCBP1	NC_000002.12	70087477	70089203	+	NM_006196.4	217	70087693	5'UTR	AGACT	126	0.680672	0.999987	YES	YES	NO
PCBP1	NC_000002.12	70087477	70089203	+	NM_006196.4	294	70087770	CDS	GGACT	170	0.820359	0.999999	YES	YES	hsa-miR-23a-3p hsa-miR-133a-3p hsa-miR-133b hsa-miR-23a-3p hsa-miR-125b-2-3p hsa-miR-23a-3p hsa-miR-23b-3p hsa-miR-133b hsa-miR-23a-3p hsa-miR-23a-3p hsa-miR-23b-3p hsa-miR-23a-3p hsa-miR-23a-3p
NUCB1	NC_000019.10	48900312	48923372	+	NM_006184.6	1964	48922930	3' UTR	AGACA	28	0.821429	0.999986	YES	YES	NO
NUCB1	NC_000019.10	48900312	48923372	+	NM_006184.6	2094	48923060	3' UTR	GGACC	31	0.258065	0.999962	YES	YES	hsa-let-7c-5p hsa-miR-31-5p hsa-let-7c-5p hsa-let-7c-5p hsa-miR-31-5p hsa-miR-31-5p
NUCB1	NC_000019.10	48900312	48923372	+	NM_006184.6	783	48913518	CDS	GGACT	11	0.5	0.999922	YES	YES	hsa-miR-18b-5p hsa-miR-18b-5p hsa-miR-148a-3p hsa-miR-148b-3p hsa-miR-148b-3p hsa-miR-24-3p hsa-miR-1910-5p
PIN1	NC_000019.10	9835318	9849689	+	NM_006221.4	985	9849665	3' UTR	CAATT	28	1	0.999978	NO	NO	NO
PPP2R5A	NC_000001.11	212285410	212361853	+	NM_006243.4	2306	212360914	3' UTR	GGACT	13	0.692308	0.999971	YES	YES	NO
RAD21	NC_000008.11	116845934	116874776	-	NM_006265.3	2271	116847323	3' UTR	GGAAA	284	0.0683453	0.999946	NO	NO	NO
MOGS	NC_000002.12	74461057	74465382	-	NM_006302.3	2096	74461828	CDS	AGACT	17	0.9375	0.999989	YES	YES	NO
MOGS	NC_000002.12	74461057	74465382	-	NM_006302.3	2642	74461282	CDS	AGACT	20	0.65	0.99992	YES	YES	hsa-miR-27a-3p hsa-miR-27b-3p hsa-miR-30a-3p hsa-miR-30e-3p
MOGS	NC_000002.12	74461057	74465382	-	NM_006302.3	2675	74461249	3' UTR	AGACA	20	0.5	0.999925	YES	YES	hsa-miR-34a-5p
BASP1	NC_000005.10	17217631	17276834	+	NM_006317.5	640	17275667	CDS	AGACT	228	0.963636	0.999983	YES	YES	hsa-miR-942-5p
HSPB3	NC_000005.10	54455699	54456377	+	NM_006308.3	261	54455959	CDS	GGACT	13	0.727273	0.999948	YES	YES	NO
HSPB3	NC_000005.10	54455699	54456377	+	NM_006308.3	536	54456234	CDS	GGACT	14	1	0.999978	YES	YES	NO
BASP1	NC_000005.10	17217631	17276834	+	NM_006317.5	241	17275268	CDS	AGAAA	59	0.888889	0.999949	NO	NO	hsa-miR-135b-5p hsa-miR-135b-5p hsa-miR-212-5p
BASP1	NC_000005.10	17217631	17276834	+	NM_006317.5	242	17275269	CDS	GAAAG	58	0.857143	0.99998	NO	NO	hsa-miR-135b-5p hsa-miR-135b-5p hsa-miR-212-5p
PGRMC2	NC_000004.12	128269242	128287813	-	NM_006320.6	1102	128270909	3' UTR	GGACT	53	0.304348	0.999925	YES	YES	NO
RAN	NC_000012.12	130872066	130877678	+	NM_006325.5	915	130876119	3' UTR	GGACC	610	0.313233	0.999938	YES	NO	NO
RAN	NC_000012.12	130872066	130877678	+	NM_006325.5	971	130876175	3' UTR	AGACT	656	0.585	0.999927	YES	NO	hsa-miR-424-5p hsa-miR-15a-5p hsa-miR-15b-5p hsa-miR-16-5p hsa-miR-199a-3p hsa-miR-15a-5p hsa-miR-15b-5p hsa-miR-16-5p hsa-miR-17-3p hsa-miR-424-5p hsa-miR-424-5p hsa-miR-424-5p hsa-let-7a-5p hsa-miR-424-5p hsa-miR-15a-5p hsa-miR-15b-5p hsa-miR-16-5p hsa-miR-424-5p hsa-miR-15a-5p hsa-let-7g-5p hsa-miR-424-5p hsa-miR-15b-5p hsa-miR-15a-5p hsa-miR-15b-5p hsa-let-7a-5p hsa-let-7c-5p hsa-miR-15a-5p h…
PGRMC2	NC_000004.12	128269242	128287813	-	NM_006320.6	1499	128270512	3' UTR	AGACT	64	0.339286	0.999904	YES	YES	hsa-miR-30d-3p hsa-miR-423-3p hsa-miR-30d-3p hsa-miR-9-5p
PGRMC2	NC_000004.12	128269242	128287813	-	NM_006320.6	618	128271393	CDS	GCAGA	22	0.947368	0.999979	NO	NO	NO
PGRMC2	NC_000004.12	128269242	128287813	-	NM_006320.6	756	128271255	3' UTR	AGACT	35	0.882353	0.999998	YES	YES	hsa-miR-34a-5p
PGRMC2	NC_000004.12	128269242	128287813	-	NM_006320.6	958	128271053	3' UTR	CAAGA	21	1	0.999905	NO	NO	NO
PGRMC2	NC_000004.12	128269242	128287813	-	NM_006320.6	960	128271051	3' UTR	AGAAA	25	1	0.999987	NO	NO	NO
PGRMC2	NC_000004.12	128269242	128287813	-	NM_006320.6	961	128271050	3' UTR	GAAAG	26	1	0.999989	NO	NO	NO
CFDP1	NC_000016.10	75293710	75433503	-	NM_006324.3	876	75305108	CDS	TGAGA	42	0.945946	0.999992	NO	NO	hsa-miR-378a-3p hsa-miR-378c
CFDP1	NC_000016.10	75293710	75433503	-	NM_006324.3	878	75305106	CDS	AGAAG	41	0.918919	0.999985	NO	NO	hsa-miR-378a-3p hsa-miR-378c
TIMM23	NC_000010.11	45972489	46003742	+	NM_006327.4	793	46003345	3' UTR	GGACA	80	0.293333	0.999955	YES	YES	NO
TIMM17A	NC_000001.11	201955503	201970664	+	NM_006335.3	542	201969556	3' UTR	GGACT	144	0.434783	0.999916	YES	YES	NO
TIMM17A	NC_000001.11	201955503	201970664	+	NM_006335.3	665	201969679	3' UTR	AGACA	165	0.915033	0.999974	YES	YES	hsa-miR-130a-3p
TIMM17A	NC_000001.11	201955503	201970664	+	NM_006335.3	667	201969681	3' UTR	ACATT	161	0.918367	0.99999	NO	NO	hsa-miR-519b-3p hsa-miR-106a-5p hsa-miR-93-5p hsa-miR-302d-3p hsa-miR-18b-5p hsa-miR-17-5p hsa-miR-106b-5p hsa-miR-302e hsa-miR-20b-5p hsa-miR-20a-5p hsa-miR-520a-3p hsa-miR-302c-3p hsa-miR-93-5p hsa-miR-130a-3p hsa-miR-17-5p hsa-miR-106a-5p hsa-miR-106b-5p hsa-miR-93-5p hsa-miR-18a-5p hsa-miR-17-5p hsa-miR-20a-5p hsa-miR-18a-5p hsa-miR-302c-3p hsa-miR-106b-5p hsa-miR-20a-5p hsa-miR-17-5p hsa-miR…
TIMM17A	NC_000001.11	201955503	201970664	+	NM_006335.3	863	201969877	3' UTR	GGACT	131	0.395349	0.999939	YES	YES	hsa-miR-877-5p hsa-miR-877-5p hsa-miR-877-5p
EMG1	NC_000012.12	6970913	6979936	+	NM_006331.8	844	6975907	3' UTR	AGACT	47	0.681818	0.999984	YES	NO	NO
MCRS1	NC_000012.12	49558299	49568142	-	NM_006337.5	573	49564816	CDS	TAAAC	20	0.944444	0.999974	NO	NO	NO
MAD2L2	NC_000001.11	11674480	11681148	-	NM_006341.4	797	11674736	3' UTR	AGACT	68	0.451613	0.999931	YES	YES	hsa-miR-34a-5p
HMGN4	NC_000006.12	26538366	26546933	+	NM_006353.3	1613	26546603	3' UTR	TGATA	44	0.775	0.999987	NO	NO	NO
HMGN4	NC_000006.12	26538366	26546933	+	NM_006353.3	524	26545514	3' UTR	TGACT	35	0.852941	0.999956	YES	YES	hsa-miR-103a-3p hsa-miR-199a-3p hsa-miR-411-5p hsa-miR-103a-3p hsa-miR-107 hsa-miR-15a-5p hsa-miR-107 hsa-miR-15a-5p hsa-miR-107 hsa-miR-15a-5p
HMGN4	NC_000006.12	26538366	26546933	+	NM_006353.3	855	26545845	3' UTR	AGACT	42	0.648649	0.999994	YES	YES	NO
SLC25A17	NC_000022.11	40769630	40819346	-	NM_006358.4	1182	40770674	3' UTR	GGACC	13	0.384615	0.999905	YES	YES	NO
SLC25A17	NC_000022.11	40769630	40819346	-	NM_006358.4	1238	40770618	3' UTR	GGACT	15	0.692308	0.999985	YES	YES	hsa-miR-23b-3p hsa-miR-23a-3p hsa-miR-23a-3p
EIF3M	NC_000011.10	32583831	32606264	+	NM_006360.6	1216	32602433	3' UTR	AAAAA	112	0.961905	0.999991	NO	NO	NO
CHERP	NC_000019.10	16517894	16542437	-	NM_006387.6	2859	16519110	3' UTR	GGACC	7	0.857143	0.999915	YES	YES	NO
IPO7	NC_000011.10	9384652	9448127	+	NM_006391.3	3342	9445307	3' UTR	GGACA	21	0.7	0.999989	YES	YES	NO
IPO7	NC_000011.10	9384652	9448127	+	NM_006391.3	3413	9445378	3' UTR	GGATT	36	0.575758	0.999983	NO	NO	NO
IPO7	NC_000011.10	9384652	9448127	+	NM_006391.3	3589	9445554	3' UTR	GGACT	56	0.538462	0.999975	YES	YES	NO
NOP56	NC_000020.11	2652632	2658393	+	NM_006392.4	1452	2657932	CDS	AGATG	48	0.978261	0.999994	NO	NO	NO
NOP56	NC_000020.11	2652632	2658393	+	NM_006392.4	1826	2658306	3' UTR	GGACA	47	0.804348	0.999999	YES	YES	NO
ZNRD2	NC_000011.10	65570477	65571888	+	NM_006396.3	617	65571736	3' UTR	AGAGA	70	0.868852	0.999992	NO	NO	NO
ZNRD2	NC_000011.10	65570477	65571888	+	NM_006396.3	619	65571738	3' UTR	AGAAG	66	0.8	0.999999	NO	NO	NO
ZNRD2	NC_000011.10	65570477	65571888	+	NM_006396.3	620	65571739	3' UTR	GAAGC	59	0.896552	1	NO	NO	NO
ANP32B	NC_000009.12	97983341	98015943	+	NM_006401.3	1017	98015477	3' UTR	GGACT	73	0.73913	0.999992	YES	YES	hsa-miR-455-3p hsa-miR-455-3p hsa-miR-424-5p
PROCR	NC_000020.11	35172072	35177362	+	NM_006404.5	981	35176994	3' UTR	GGACA	36	0.352941	0.999932	YES	YES	hsa-miR-512-3p hsa-miR-302a-3p
TM9SF1	NC_000014.9	24189149	24195441	-	NM_006405.7	594	24193134	CDS	GGACC	18	0.470588	0.999981	YES	YES	hsa-miR-4454
ARL6IP5	NC_000003.12	69084937	69106092	+	NM_006407.4	1393	69105351	3' UTR	GGACT	51	0.5	0.999984	YES	YES	NO
AGPAT1	NC_000006.12	32168212	32176084	-	NM_006411.4	1328	32169080	3' UTR	GGACT	9	0.666667	0.999903	YES	YES	hsa-miR-31-5p hsa-miR-31-5p
AGPAT2	NC_000009.12	136673143	136687457	-	NM_006412.4	1008	136673681	3' UTR	GGACT	40	0.567568	0.99997	YES	YES	NO
AGPAT2	NC_000009.12	136673143	136687457	-	NM_006412.4	1139	136673550	3' UTR	GGACC	42	0.333333	0.999942	YES	YES	NO
AGPAT2	NC_000009.12	136673143	136687457	-	NM_006412.4	1164	136673525	3' UTR	GGACT	43	0.628571	0.99998	YES	YES	NO
AGPAT2	NC_000009.12	136673143	136687457	-	NM_006412.4	1484	136673205	3' UTR	AGACT	40	0.675676	0.999988	YES	YES	NO
MRPL28	NC_000016.10	366969	370538	-	NM_006428.5	706	368332	CDS	GGAGA	47	0.84375	0.9999	NO	NO	NO
PAIP1	NC_000005.10	43526267	43557077	-	NM_006451.5	1482	43533739	CDS	CCAGA	34	0.821429	0.99996	NO	NO	NO
P3H4	NC_000017.11	41801953	41811949	-	NM_006455.3	129	41811821	CDS	GGACC	18	0.4375	0.999976	YES	YES	NO
P3H4	NC_000017.11	41801953	41811949	-	NM_006455.3	2038	41802267	3' UTR	GGACA	15	0.866667	0.999995	YES	YES	NO
P3H4	NC_000017.11	41801953	41811949	-	NM_006455.3	2052	41802253	3' UTR	GGACC	39	0.205128	0.999964	YES	YES	NO
P3H4	NC_000017.11	41801953	41811949	-	NM_006455.3	627	41811154	CDS	GGACC	28	0.296296	0.999947	YES	YES	NO
P3H4	NC_000017.11	41801953	41811949	-	NM_006455.3	792	41810892	CDS	GGACT	32	0.225806	0.999906	YES	YES	hsa-miR-183-3p
HEXIM1	NC_000017.11	45148475	45152099	+	NM_006460.3	1513	45149987	CDS	GGACT	18	0.944444	0.999941	YES	YES	hsa-miR-148a-5p
HEXIM1	NC_000017.11	45148475	45152099	+	NM_006460.3	1797	45150271	3' UTR	AGACT	26	0.692308	0.99996	YES	YES	hsa-miR-30a-3p hsa-miR-340-3p hsa-miR-30e-3p
HEXIM1	NC_000017.11	45148475	45152099	+	NM_006460.3	1830	45150304	3' UTR	GGACT	27	0.5	0.999994	YES	YES	hsa-miR-148a-5p hsa-miR-548k hsa-miR-19a-3p hsa-miR-19a-3p hsa-miR-3184-3p hsa-miR-3184-3p hsa-miR-3184-3p hsa-miR-148a-5p hsa-miR-19a-3p hsa-miR-193b-3p hsa-miR-365a-3p hsa-miR-484
HEXIM1	NC_000017.11	45148475	45152099	+	NM_006460.3	1884	45150358	3' UTR	GGACC	21	0.55	0.999994	YES	YES	hsa-miR-142-5p hsa-miR-142-5p hsa-miR-142-5p hsa-miR-142-5p
SPAG5	NC_000017.11	28577574	28599025	-	NM_006461.4	771	28592552	CDS	GGACT	10	0.777778	0.999949	YES	YES	NO
TAF6L	NC_000011.10	62771396	62787342	+	NM_006473.4	1547	62786866	CDS	GGACT	10	0.9	0.99995	YES	YES	NO
TAF6L	NC_000011.10	62771396	62787342	+	NM_006473.4	1952	62787271	CDS	GGACT	7	1	0.999945	YES	YES	NO
ATP5MG	NC_000011.10	118401606	118409847	+	NM_006476.5	494	118409220	3' UTR	AGATA	11	1	0.999991	NO	NO	NO
GNAI3	NC_000001.11	109548615	109600195	+	NM_006496.4	2284	109593435	3' UTR	GGACT	66	0.245902	0.999919	YES	YES	NO
MCAM	NC_000011.10	119308529	119317130	-	NM_006500.3	2055	119309801	3' UTR	GGACT	24	0.55	0.999975	YES	YES	NO
MCAM	NC_000011.10	119308529	119317130	-	NM_006500.3	2127	119309729	3' UTR	GGACC	23	0.5	0.99993	YES	YES	NO
TRIM27	NC_000006.12	28903002	28923985	-	NM_006510.5	1503	28904462	CDS	GGACC	37	0.27027	0.999965	YES	YES	NO
TRIM27	NC_000006.12	28903002	28923985	-	NM_006510.5	1675	28904290	CDS	GGACT	42	0.846154	0.999996	YES	YES	NO
TRIM27	NC_000006.12	28903002	28923985	-	NM_006510.5	305	28923681	5'UTR	GCAGA	24	0.954545	0.999982	NO	NO	NO
SLC2A1	NC_000001.11	42925353	42958868	-	NM_006516.4	1407	42927693	CDS	CCAGG	13	0.846154	0.999935	NO	NO	hsa-miR-149-5p hsa-miR-10a-5p hsa-miR-10a-5p hsa-miR-149-5p hsa-miR-504-5p hsa-miR-10a-5p hsa-miR-10a-5p
SLC2A1	NC_000001.11	42925353	42958868	-	NM_006516.4	1772	42926965	3' UTR	AGACT	39	0.789474	0.999989	YES	YES	NO
SLC2A1	NC_000001.11	42925353	42958868	-	NM_006516.4	1856	42926881	3' UTR	GGACT	42	0.9	0.999995	YES	YES	hsa-miR-148a-5p hsa-miR-148b-5p hsa-miR-148a-5p hsa-miR-148b-5p
SLC2A1	NC_000001.11	42925353	42958868	-	NM_006516.4	1889	42926848	3' UTR	AGACT	29	0.653846	0.999989	YES	YES	hsa-miR-212-3p hsa-miR-34a-5p
SLC2A1	NC_000001.11	42925353	42958868	-	NM_006516.4	2098	42926639	3' UTR	GGACA	37	0.571429	0.999993	YES	YES	hsa-miR-532-5p hsa-miR-203b-5p
TFE3	NC_000023.11	49028726	49043357	-	NM_006521.6	1699	49030318	CDS	GGACA	9	1	0.999919	YES	YES	hsa-miR-191-5p
WNT6	NC_000002.12	218859805	218874233	+	NM_006522.4	1180	218873694	CDS	GGACC	67	0.41791	0.999956	YES	YES	NO
WNT6	NC_000002.12	218859805	218874233	+	NM_006522.4	1351	218873865	3' UTR	AGACT	69	0.757576	0.999997	YES	YES	NO
WNT6	NC_000002.12	218859805	218874233	+	NM_006522.4	1386	218873900	3' UTR	GGACC	67	0.686567	0.999997	YES	YES	NO
SLBP	NC_000004.12	1692731	1712319	-	NM_006527.4	601	1699573	CDS	AGAAG	30	1	0.999976	NO	NO	hsa-miR-96-5p
YEATS4	NC_000012.12	69359743	69390870	+	NM_006530.4	981	69390383	3' UTR	GGACT	36	0.542857	0.999974	YES	NO	NO
KHDRBS1	NC_000001.11	32013868	32043877	+	NM_006559.3	1758	32042922	3' UTR	AAAAA	55	0.980769	0.999931	NO	NO	NO
KHDRBS1	NC_000001.11	32013868	32043877	+	NM_006559.3	193	32014060	CDS	GGACC	47	0.212766	0.999988	YES	YES	NO
FARS2	NC_000006.12	5261513	5771583	+	NM_006567.5	654	5369055	CDS	GGACT	13	0.454545	0.999971	YES	YES	NO
CGRRF1	NC_000014.9	54509906	54539292	+	NM_006568.3	828	54538158	CDS	GGACT	11	0.6	0.999924	YES	YES	NO
RRAGA	NC_000009.12	19049427	19051025	+	NM_006570.5	1336	19050762	3' UTR	GGACG	53	0.918367	0.999984	NO	YES	NO
RRAGA	NC_000009.12	19049427	19051025	+	NM_006570.5	418	19049844	CDS	GGACT	49	0.702128	0.99999	YES	YES	hsa-miR-139-5p hsa-miR-139-5p hsa-miR-139-5p hsa-miR-139-5p hsa-miR-139-5p hsa-miR-139-5p
CNPY3	NC_000006.12	42929480	42939294	+	NM_006586.5	1187	42939050	3' UTR	GGACT	18	0.611111	0.999993	YES	YES	NO
API5	NC_000011.10	43311996	43344529	+	NM_006595.4	2259	43343067	3' UTR	AGAAA	10	1	0.999944	NO	NO	NO
HSPA8	NC_000011.10	123057489	123062136	-	NM_006597.6	1031	123059640	CDS	AGAGA	276	0.748988	0.999964	NO	NO	hsa-miR-3158-3p hsa-miR-4482-3p hsa-miR-423-5p hsa-miR-27a-5p hsa-miR-27a-5p hsa-miR-3158-3p hsa-miR-3158-3p hsa-miR-3158-3p hsa-miR-3158-3p
HSPA8	NC_000011.10	123057489	123062136	-	NM_006597.6	1033	123059638	CDS	AGAAA	266	0.776423	0.99996	NO	NO	hsa-miR-3158-3p hsa-miR-4482-3p hsa-miR-423-5p hsa-miR-27a-5p hsa-miR-27a-5p hsa-miR-3158-3p hsa-miR-3158-3p hsa-miR-3158-3p hsa-miR-3158-3p
SLC12A7	NC_000005.10	1050384	1112063	-	NM_006598.3	3867	1051817	3' UTR	GGACT	10	1	0.999958	YES	YES	hsa-miR-34a-5p
SLC12A7	NC_000005.10	1050384	1112063	-	NM_006598.3	4272	1051412	3' UTR	GGACT	9	0.888889	0.999933	YES	YES	hsa-miR-449c-5p hsa-miR-1180-3p hsa-miR-1910-5p hsa-miR-221-5p
KIF1C	NC_000017.11	4997950	5028401	+	NM_006612.6	3208	5023692	CDS	GGACT	9	0.888889	0.999926	YES	YES	hsa-miR-30d-3p hsa-miR-17-3p hsa-miR-3074-5p
AHCYL1	NC_000001.11	109984765	110023742	+	NM_006621.7	3278	110023077	3' UTR	TAATT	22	1	0.999959	NO	NO	NO
POP4	NC_000019.10	29606283	29617237	+	NM_006627.3	1083	29615764	3' UTR	GGACA	16	0.6	0.999995	YES	YES	NO
POP4	NC_000019.10	29606283	29617237	+	NM_006627.3	745	29615426	3' UTR	GGACA	40	0.675676	0.999991	YES	YES	NO
HSPH1	NC_000013.11	31134973	31161904	-	NM_006644.4	2889	31137328	CDS	GGACT	11	0.727273	0.99995	YES	YES	hsa-miR-26b-5p hsa-miR-26a-5p hsa-miR-26b-5p
HSPH1	NC_000013.11	31134973	31161904	-	NM_006644.4	2895	31137322	CDS	GGACT	11	0.7	0.999982	YES	YES	hsa-miR-26b-5p hsa-miR-26a-5p hsa-miR-26b-5p
CLPX	NC_000015.10	65148219	65185342	-	NM_006660.5	2285	65150629	3' UTR	GGACT	14	0.846154	0.999937	YES	YES	hsa-miR-106b-5p hsa-miR-20a-5p hsa-miR-106b-5p hsa-miR-20a-5p hsa-miR-106b-5p hsa-miR-20a-5p hsa-miR-106b-5p hsa-miR-20a-5p
TPBG	NC_000006.12	82362983	82367420	+	NM_006670.5	1878	82365680	CDS	GGACT	7	1	0.999921	YES	YES	hsa-let-7b-5p hsa-miR-221-3p
TPBG	NC_000006.12	82362983	82367420	+	NM_006670.5	2187	82365989	CDS	GGACT	9	0.888889	0.999968	YES	NO	hsa-miR-101-3p hsa-miR-27a-3p hsa-miR-27a-3p hsa-miR-128-3p hsa-miR-27b-3p hsa-miR-26b-5p hsa-miR-27a-3p hsa-miR-27a-3p hsa-miR-128-3p hsa-miR-128-3p hsa-miR-128-3p hsa-miR-26b-5p hsa-miR-27b-3p hsa-miR-27a-3p hsa-miR-27a-3p hsa-miR-27b-3p hsa-miR-4664-3p
C1QL1	NC_000017.11	44959693	44968303	-	NM_006688.5	1300	44959920	3' UTR	GGACT	38	0.90625	0.999975	YES	YES	hsa-miR-30b-5p hsa-miR-30c-5p
BLCAP	NC_000020.11	37517417	37527876	-	NM_006698.4	1682	37517753	3' UTR	AGACT	10	0.9	0.999924	YES	YES	NO
NUDT3	NC_000006.12	34279679	34392669	-	NM_006703.4	867	34288712	3' UTR	AGACT	15	0.666667	0.999991	YES	YES	NO
GLO1	NC_000006.12	38675925	38703145	-	NM_006708.3	728	38677213	3' UTR	GGACT	92	0.773333	0.999927	YES	YES	hsa-miR-374a-3p hsa-miR-1910-5p
RNPS1	NC_000016.10	2253120	2267886	-	NM_006711.5	1260	2253963	3' UTR	AAACA	14	1	0.999906	YES	YES	hsa-miR-152-3p hsa-miR-26b-3p
IFRD2	NC_000003.12	50287732	50292429	-	NM_006764.5	1910	50287765	3' UTR	TAATT	53	1	0.999961	NO	NO	NO
LMO4	NC_000001.11	87328880	87348923	+	NM_006769.4	1062	87344992	3' UTR	GGACT	21	0.7	0.999993	YES	YES	NO
LMO4	NC_000001.11	87328880	87348923	+	NM_006769.4	195	87329074	5'UTR	AAAAA	20	0.888889	0.999978	NO	NO	NO
LMO4	NC_000001.11	87328880	87348923	+	NM_006769.4	196	87329075	5'UTR	AAAAA	20	0.888889	0.999946	NO	NO	NO
LMO4	NC_000001.11	87328880	87348923	+	NM_006769.4	197	87329076	5'UTR	AAAAA	20	0.823529	0.999902	NO	NO	NO
LMO4	NC_000001.11	87328880	87348923	+	NM_006769.4	198	87329077	5'UTR	AAAAA	19	0.8	0.999955	NO	NO	NO
LMO4	NC_000001.11	87328880	87348923	+	NM_006769.4	199	87329078	5'UTR	AAAAA	20	0.8	0.999915	NO	NO	NO
LMO4	NC_000001.11	87328880	87348923	+	NM_006769.4	200	87329079	5'UTR	AAAAA	19	0.944444	0.999981	NO	NO	NO
LMO4	NC_000001.11	87328880	87348923	+	NM_006769.4	201	87329080	5'UTR	AAAAA	19	0.933333	0.999963	NO	NO	NO
LMO4	NC_000001.11	87328880	87348923	+	NM_006769.4	202	87329081	5'UTR	AAAAA	17	1	0.999994	NO	NO	NO
AFG3L2	NC_000018.10	12328944	12377227	-	NM_006796.3	2820	12329284	3' UTR	GGACC	51	0.352941	0.999959	YES	YES	NO
PRSS21	NC_000016.10	2817237	2821719	+	NM_006799.4	541	2818928	CDS	AGACT	50	0.695652	0.999943	YES	NO	NO
PRSS21	NC_000016.10	2817237	2821719	+	NM_006799.4	752	2821380	CDS	GGACC	66	0.276923	0.999939	YES	YES	NO
PRSS21	NC_000016.10	2817237	2821719	+	NM_006799.4	776	2821404	CDS	GGACT	65	0.77193	0.999971	YES	YES	NO
KDELR1	NC_000019.10	48382575	48391551	-	NM_006801.3	753	48384274	CDS	CCAGA	26	0.96	0.999999	NO	NO	hsa-miR-378i hsa-miR-452-5p hsa-miR-378i hsa-miR-452-5p hsa-miR-378a-3p
SF3A3	NC_000001.11	37956975	37990022	-	NM_006802.4	927	37978785	CDS	GGAAA	15	0.923077	0.999966	NO	NO	hsa-miR-365a-5p
HNRNPA0	NC_000005.10	137745651	137754363	-	NM_006805.4	1161	137753203	CDS	GGACC	60	0.913793	0.999999	YES	YES	hsa-miR-18a-5p hsa-miR-4677-3p hsa-miR-135a-2-3p hsa-miR-18a-5p hsa-miR-4677-3p
HNRNPA0	NC_000005.10	137745651	137754363	-	NM_006805.4	1417	137752947	3' UTR	GGACT	69	0.96875	0.999988	YES	YES	hsa-miR-455-3p hsa-miR-128-1-5p hsa-miR-744-5p hsa-miR-769-5p hsa-miR-196a-5p hsa-miR-1910-5p hsa-miR-340-3p hsa-miR-340-3p hsa-miR-196a-5p hsa-miR-486-3p hsa-miR-744-5p hsa-let-7a-5p
HNRNPA0	NC_000005.10	137745651	137754363	-	NM_006805.4	1460	137752904	3' UTR	GGACT	73	0.972603	1	YES	YES	hsa-miR-186-5p hsa-miR-186-5p hsa-miR-181a-3p hsa-miR-181a-3p hsa-miR-181a-3p hsa-miR-877-5p
HNRNPA0	NC_000005.10	137745651	137754363	-	NM_006805.4	1485	137752879	3' UTR	GGACC	61	0.95082	1	YES	YES	hsa-miR-18a-5p hsa-miR-18b-5p hsa-miR-26a-5p hsa-miR-26b-5p hsa-miR-26b-5p hsa-miR-26a-5p hsa-miR-26b-5p hsa-miR-26a-5p hsa-miR-26b-5p hsa-miR-18a-5p hsa-miR-26a-5p hsa-miR-26b-5p hsa-miR-1307-5p hsa-miR-561-5p hsa-miR-18a-5p hsa-miR-26a-5p hsa-miR-26b-5p hsa-miR-1307-5p hsa-miR-1307-5p hsa-miR-26b-5p
HNRNPA0	NC_000005.10	137745651	137754363	-	NM_006805.4	1623	137752741	3' UTR	GGACT	81	0.626667	0.999921	YES	YES	hsa-miR-26a-5p hsa-miR-26b-5p hsa-miR-26b-5p hsa-miR-26a-5p hsa-miR-26a-5p hsa-miR-148a-5p hsa-miR-26a-5p hsa-miR-26b-5p hsa-miR-26b-5p hsa-miR-26b-5p
HNRNPA0	NC_000005.10	137745651	137754363	-	NM_006805.4	391	137753973	CDS	GGACT	34	1	0.999995	YES	YES	NO
HNRNPA0	NC_000005.10	137745651	137754363	-	NM_006805.4	401	137753963	CDS	GGACT	37	0.857143	0.999994	YES	YES	NO
BTG3	NC_000021.9	17593653	17612901	-	NM_006806.5	1208	17593855	3' UTR	GGACT	25	0.32	0.999911	YES	YES	hsa-miR-26b-5p hsa-miR-26b-5p hsa-miR-19a-3p hsa-miR-25-3p hsa-miR-92a-3p hsa-miR-513c-5p hsa-miR-513c-5p
OS9	NC_000012.12	57694132	57721557	+	NM_006812.4	2081	57720956	3' UTR	GGACT	17	0.8125	0.999992	YES	NO	hsa-miR-361-3p
OS9	NC_000012.12	57694132	57721557	+	NM_006812.4	2156	57721031	3' UTR	GGACC	14	0.384615	0.999944	YES	NO	NO
PNRC1	NC_000006.12	89080751	89085160	+	NM_006813.3	1179	89084247	3' UTR	GGACT	45	1	1	YES	YES	hsa-miR-513c-5p
PNRC1	NC_000006.12	89080751	89085160	+	NM_006813.3	781	89083849	CDS	ACAGA	36	1	0.999954	NO	NO	NO
ERP29	NC_000012.12	112013426	112023449	+	NM_006817.4	969	112022795	3' UTR	GGACA	153	0.893333	0.999966	YES	NO	NO
ACOT2	NC_000014.9	73569213	73575655	+	NM_006821.6	1256	73575289	CDS	GGAGA	33	0.9	0.999982	NO	NO	NO
ACOT2	NC_000014.9	73569213	73575655	+	NM_006821.6	1258	73575291	CDS	AGAAA	32	0.923077	0.999984	NO	NO	NO
CKAP4	NC_000012.12	106237881	106248020	-	NM_006825.4	2498	106238504	3' UTR	GGAGA	104	0.776471	0.999974	NO	NO	NO
CKAP4	NC_000012.12	106237881	106248020	-	NM_006825.4	2501	106238501	3' UTR	GAAGC	101	0.978723	0.999965	NO	NO	NO
TMED10	NC_000014.9	75131469	75176612	-	NM_006827.6	1019	75134559	3' UTR	GGACT	159	0.405229	0.999925	YES	YES	NO
TMED10	NC_000014.9	75131469	75176612	-	NM_006827.6	877	75134701	3' UTR	GGACT	138	0.503817	0.999906	YES	YES	NO
RAB40B	NC_000017.11	82654973	82698698	-	NM_006822.3	1100	82657702	3' UTR	GGACT	10	0.9	0.99996	YES	YES	hsa-miR-204-5p
EBNA1BP2	NC_000001.11	43164184	43172290	-	NM_006824.3	744	43167201	CDS	GGAGA	53	0.921569	0.999958	NO	NO	hsa-miR-27a-5p hsa-miR-1180-3p
EBNA1BP2	NC_000001.11	43164184	43172290	-	NM_006824.3	746	43167199	CDS	AGAAA	54	0.943396	0.999994	NO	NO	hsa-miR-27a-5p hsa-miR-1180-3p
CKAP4	NC_000012.12	106237881	106248020	-	NM_006825.4	1086	106239916	CDS	GGACA	37	0.416667	0.999995	YES	NO	NO
CKAP4	NC_000012.12	106237881	106248020	-	NM_006825.4	1393	106239609	CDS	GGACT	43	0.930233	0.999994	YES	NO	NO
CKAP4	NC_000012.12	106237881	106248020	-	NM_006825.4	1719	106239283	CDS	GGACC	61	0.542373	0.999939	YES	NO	NO
CKAP4	NC_000012.12	106237881	106248020	-	NM_006825.4	1752	106239250	CDS	GGACT	44	0.725	0.999993	YES	NO	hsa-miR-196a-5p hsa-miR-425-3p hsa-miR-373-3p hsa-miR-1910-5p hsa-miR-148b-5p hsa-miR-148b-5p
CKAP4	NC_000012.12	106237881	106248020	-	NM_006825.4	1763	106239239	CDS	ACAGA	52	0.979167	0.999949	NO	NO	hsa-miR-3184-3p
CKAP4	NC_000012.12	106237881	106248020	-	NM_006825.4	1765	106239237	CDS	AGACT	48	0.931818	0.999998	YES	NO	hsa-miR-3184-3p
CKAP4	NC_000012.12	106237881	106248020	-	NM_006825.4	1815	106239187	CDS	GGACT	74	0.90411	1	YES	NO	NO
CLP1	NC_000011.10	57657762	57661865	+	NM_006831.3	1510	57661547	3' UTR	GGACT	7	1	0.999931	YES	YES	NO
RAB32	NC_000006.12	146543833	146554953	+	NM_006834.5	1059	146554947	3' UTR	TTACC	17	0.692308	0.999911	NO	NO	NO
RAB32	NC_000006.12	146543833	146554953	+	NM_006834.5	682	146554570	CDS	AGACC	46	0.452381	0.999918	YES	YES	NO
GCN1	NC_000012.12	120127202	120194715	-	NM_006836.2	8162	120127721	3' UTR	AGACC	26	0.269231	0.999912	YES	NO	hsa-miR-34a-5p hsa-miR-34a-5p hsa-miR-34a-5p
GCN1	NC_000012.12	120127202	120194715	-	NM_006836.2	8341	120127542	3' UTR	AGACT	30	0.75	0.999989	YES	NO	NO
METAP2	NC_000012.12	95474152	95515839	+	NM_006838.4	1565	95514004	3' UTR	GGACC	24	0.695652	0.999959	YES	NO	hsa-miR-92a-3p hsa-miR-92b-3p hsa-miR-363-3p hsa-miR-629-5p hsa-miR-92a-3p hsa-miR-92b-3p
METAP2	NC_000012.12	95474152	95515839	+	NM_006838.4	1658	95514097	3' UTR	GGACT	31	0.866667	0.999994	YES	NO	hsa-miR-106a-5p hsa-miR-106a-5p hsa-miR-106a-5p hsa-miR-548k
CCDC85B	NC_000011.10	65890673	65891635	+	NM_006848.3	365	65891037	CDS	GGACT	108	0.546296	0.999906	YES	YES	hsa-miR-16-5p hsa-miR-92a-3p
CCDC85B	NC_000011.10	65890673	65891635	+	NM_006848.3	418	65891090	CDS	GGACC	129	0.150794	0.999948	YES	YES	NO
CCDC85B	NC_000011.10	65890673	65891635	+	NM_006848.3	785	65891457	3' UTR	GGACC	155	0.409091	0.99997	YES	YES	hsa-miR-370-5p
CCDC85B	NC_000011.10	65890673	65891635	+	NM_006848.3	837	65891509	3' UTR	GGACT	128	0.952	0.999999	YES	YES	hsa-miR-423-3p
CCDC85B	NC_000011.10	65890673	65891635	+	NM_006848.3	896	65891568	3' UTR	GGACT	138	0.78626	0.999989	YES	YES	hsa-miR-484 hsa-miR-615-3p hsa-miR-484 hsa-miR-24-3p
CCDC85B	NC_000011.10	65890673	65891635	+	NM_006848.3	917	65891589	3' UTR	GGACT	125	0.96	1	YES	YES	hsa-miR-34a-5p hsa-miR-3184-3p
SF3B2	NC_000011.10	66052364	66069308	+	NM_006842.3	1576	66059935	CDS	AGAAG	10	1	0.999981	NO	NO	hsa-miR-135b-5p
SF3B2	NC_000011.10	66052364	66069308	+	NM_006842.3	1577	66059936	CDS	GAAGC	10	1	0.999986	NO	NO	hsa-miR-135b-5p
KDELR2	NC_000007.14	6461089	6484152	-	NM_006854.4	2675	6461200	3' UTR	GGACT	15	0.666667	0.999973	YES	YES	NO
TMED1	NC_000019.10	10832067	10836212	-	NM_006858.4	731	10832969	3' UTR	GGACA	42	0.833333	0.999989	YES	YES	NO
TMED1	NC_000019.10	10832067	10836212	-	NM_006858.4	765	10832935	3' UTR	AGACT	51	0.85	0.999937	YES	YES	NO
DSTN	NC_000020.11	17570075	17609919	+	NM_006870.4	780	17607294	3' UTR	AAACA	161	1	0.999913	YES	YES	hsa-miR-484
B4GAT1	NC_000011.10	66345374	66347629	-	NM_006876.3	1785	66345596	3' UTR	GGACT	10	0.9	0.999944	YES	YES	NO
RBBP6	NC_000016.10	24539566	24572863	+	NM_006910.5	694	24540259	5'UTR	GGACT	8	1	0.999949	YES	YES	NO
RBBP6	NC_000016.10	24539566	24572863	+	NM_006910.5	723	24540288	5'UTR	TGACT	10	1	0.999957	YES	NO	NO
RNF5	NC_000006.12	32178405	32180793	+	NM_006913.4	363	32179747	CDS	AGAAG	61	0.983051	0.999931	NO	NO	NO
RNF5	NC_000006.12	32178405	32180793	+	NM_006913.4	364	32179748	CDS	GAAGC	63	1	0.999911	NO	NO	NO
SDF2	NC_000017.11	28648346	28661906	-	NM_006923.4	997	28648658	3' UTR	GGACT	12	0.909091	0.999991	YES	YES	hsa-miR-132-3p hsa-miR-132-3p
SOX12	NC_000020.11	325552	330224	+	NM_006943.4	3013	328564	3' UTR	AGACA	18	0.705882	0.999995	YES	YES	NO
SRP72	NC_000004.12	56467617	56503681	+	NM_006947.4	2842	56502668	3' UTR	GGACT	17	0.352941	0.999915	YES	YES	NO
RNF113A	NC_000023.11	119870475	119871733	-	NM_006978.3	731	119871003	CDS	GGACT	28	0.62963	0.999926	YES	YES	hsa-miR-22-5p
ADRM1	NC_000020.11	62302997	62308862	+	NM_007002.4	421	62306233	CDS	GGAAA	23	0.954545	0.999985	NO	NO	hsa-miR-1180-3p hsa-miR-182-5p hsa-miR-1180-3p hsa-miR-182-5p hsa-miR-3613-5p hsa-miR-3613-5p hsa-miR-1180-3p
ADRM1	NC_000020.11	62302997	62308862	+	NM_007002.4	422	62306234	CDS	GAAAG	23	1	0.999947	NO	NO	hsa-miR-1180-3p hsa-miR-1180-3p hsa-miR-3613-5p hsa-miR-3613-5p hsa-miR-1180-3p
NUDT21	NC_000016.10	56429133	56451332	-	NM_007006.3	1635	56431891	3' UTR	CAATT	17	0.928571	0.999985	NO	NO	hsa-miR-26a-5p hsa-miR-26a-5p hsa-miR-26b-5p hsa-miR-26b-5p hsa-miR-26a-5p
TMEM115	NC_000003.12	50354750	50359521	-	NM_007024.5	1955	50354902	3' UTR	AGACT	18	1	0.999984	YES	YES	NO
TMEM115	NC_000003.12	50354750	50359521	-	NM_007024.5	922	50358600	CDS	GGACT	15	0.866667	0.99999	YES	YES	NO
DUSP14	NC_000017.11	37489891	37513498	+	NM_007026.4	509	37512533	CDS	GGACT	31	1	0.99999	YES	YES	hsa-miR-106a-5p hsa-miR-17-5p hsa-miR-20a-5p hsa-miR-20b-5p hsa-miR-93-5p hsa-miR-106a-5p hsa-miR-106b-5p hsa-miR-17-5p hsa-miR-20a-5p hsa-miR-20b-5p hsa-miR-93-5p hsa-miR-106b-5p hsa-miR-17-5p hsa-miR-20a-5p hsa-miR-93-5p hsa-miR-17-5p hsa-miR-17-5p hsa-miR-20a-5p hsa-miR-93-5p hsa-miR-17-5p hsa-miR-20a-5p hsa-miR-93-5p
DUSP14	NC_000017.11	37489891	37513498	+	NM_007026.4	725	37512749	CDS	ATAGA	31	0.965517	0.999977	NO	NO	NO
ZWINT	NC_000010.11	56357227	56361259	-	NM_007057.4	1113	56357971	3' UTR	GGACT	30	0.866667	0.999998	YES	YES	hsa-miR-127-3p
CDC37	NC_000019.10	10391133	10403542	-	NM_007065.4	1582	10391169	3' UTR	AAACA	107	0.990385	0.999961	YES	YES	NO
CDC37	NC_000019.10	10391133	10403542	-	NM_007065.4	1145	10391606	CDS	GGACC	133	0.0530303	0.999929	YES	YES	NO
PLAAT3	NC_000011.10	63574462	63614437	-	NM_007069.3	920	63574937	3' UTR	AAAGA	58	0.792453	0.999995	NO	NO	NO
PLAAT3	NC_000011.10	63574462	63614437	-	NM_007069.3	922	63574935	3' UTR	AGACT	67	0.761905	0.999951	YES	YES	NO
ATP5ME	NC_000004.12	672436	674276	-	NM_007100.4	278	672461	3' UTR	TGAAT	105	0.494737	0.999944	NO	NO	hsa-miR-375-3p hsa-miR-375-3p
FSTL1	NC_000003.12	120392293	120450992	-	NM_007085.5	3442	120394533	3' UTR	GGACT	64	0.306452	0.999945	YES	YES	hsa-miR-139-5p
VCP	NC_000009.12	35056064	35072625	-	NM_007126.5	2732	35057078	3' UTR	GGACC	56	0.363636	0.999981	YES	YES	NO
PRSS23	NC_000011.10	86800542	86811233	+	NM_007173.6	1259	86808779	CDS	GGATT	178	0.780488	0.999927	NO	NO	NO
PRSS23	NC_000011.10	86800542	86811233	+	NM_007173.6	321	86807841	CDS	GGACC	128	0.252033	0.999973	YES	YES	NO
PRSS23	NC_000011.10	86800542	86811233	+	NM_007173.6	418	86807938	CDS	AGACG	123	0.564103	0.999965	NO	YES	NO
PRSS23	NC_000011.10	86800542	86811233	+	NM_007173.6	854	86808374	CDS	GGATT	155	0.617647	0.999972	NO	NO	hsa-miR-126-3p hsa-miR-374b-5p
PRSS23	NC_000011.10	86800542	86811233	+	NM_007173.6	551	86808071	CDS	GGACT	88	0.951807	0.999999	YES	YES	NO
ERG28	NC_000014.9	75649791	75660876	-	NM_007176.4	811	75651300	3' UTR	GAAGC	30	1	0.999996	NO	NO	hsa-miR-148b-3p hsa-miR-148b-3p hsa-miR-148b-3p
ABCF2	NC_000007.14	151211484	151227205	-	NM_007189.3	2035	151213976	3' UTR	GGACC	36	0.571429	0.999983	YES	YES	NO
ABCF2	NC_000007.14	151211484	151227205	-	NM_007189.3	2186	151213825	3' UTR	GGACT	39	0.846154	0.999994	YES	YES	NO
ABCF2	NC_000007.14	151211484	151227205	-	NM_007189.3	2850	151213161	3' UTR	AGACT	11	1	0.999946	YES	YES	NO
SUPT16H	NC_000014.9	21351476	21384019	-	NM_007192.4	3380	21352529	3' UTR	GGACC	21	0.333333	0.999968	YES	YES	NO
FZD10	NC_000012.12	130162464	130165740	+	NM_007197.4	2756	130165219	3' UTR	ATAGA	10	0.75	0.999972	NO	NO	NO
FZD10	NC_000012.12	130162464	130165740	+	NM_007197.4	2758	130165221	3' UTR	AGACT	10	0.6	0.999906	YES	NO	NO
DDX20	NC_000001.11	111755901	111768000	+	NM_007204.5	1533	111765933	CDS	GGACT	11	1	0.999927	YES	YES	NO
DDX20	NC_000001.11	111755901	111768000	+	NM_007204.5	2616	111767016	3' UTR	AGACT	16	0.923077	0.999964	YES	YES	NO
MRPL3	NC_000003.12	131462212	131502971	-	NM_007208.4	1457	131462463	3' UTR	GGACT	86	0.3625	0.999929	YES	YES	hsa-miR-6507-5p
RNF139	NC_000008.11	124474880	124488618	+	NM_007218.4	541	124485960	CDS	TGACT	9	1	0.999943	YES	NO	hsa-miR-142-5p hsa-miR-625-3p hsa-miR-142-5p hsa-miR-142-5p hsa-miR-142-5p hsa-let-7d-5p hsa-miR-142-5p hsa-let-7d-5p hsa-let-7d-5p hsa-miR-26b-5p hsa-miR-29b-3p hsa-miR-29c-3p hsa-miR-29a-3p hsa-miR-29b-3p hsa-miR-29c-3p
PMF1	NC_000001.11	156213007	156240042	+	NM_007221.4	765	156239739	3' UTR	GGACT	36	0.545455	0.99999	YES	YES	NO
DCTN3	NC_000009.12	34613546	34620495	-	NM_007234.5	423	34614729	CDS	CCAGA	34	0.939394	0.999971	NO	NO	NO
XPOT	NC_000012.12	64404392	64451125	+	NM_007235.6	2532	64431606	CDS	GGACT	12	0.583333	0.999974	YES	NO	hsa-miR-132-3p hsa-miR-30a-5p hsa-miR-30b-5p hsa-miR-30c-5p hsa-miR-30d-5p hsa-miR-30e-5p hsa-miR-30a-5p hsa-miR-30d-5p hsa-miR-30e-5p hsa-miR-30a-5p hsa-miR-30b-5p hsa-miR-30c-5p hsa-miR-30d-5p hsa-miR-30e-5p hsa-miR-30a-5p hsa-miR-30b-5p hsa-miR-30c-5p hsa-miR-30d-5p hsa-miR-30e-5p hsa-miR-30a-5p hsa-miR-30d-5p
TWF2	NC_000003.12	52228612	52239158	-	NM_007284.4	1222	52229004	3' UTR	GGACT	100	0.673684	0.99999	YES	YES	hsa-miR-139-5p
CYB5R3	NC_000022.11	42617840	42646989	-	NM_007326.4	1361	42619401	3' UTR	AGACA	12	0.75	0.999953	YES	YES	NO
OGFR	NC_000020.11	62804835	62814000	+	NM_007346.4	1307	62812897	CDS	GGACC	25	0.5	0.999994	YES	YES	NO
OGFR	NC_000020.11	62804835	62814000	+	NM_007346.4	1329	62812919	CDS	GGACC	25	0.625	0.999988	YES	YES	NO
OGFR	NC_000020.11	62804835	62814000	+	NM_007346.4	1507	62813097	CDS	GGACA	21	0.631579	0.99996	YES	YES	NO
OGFR	NC_000020.11	62804835	62814000	+	NM_007346.4	1533	62813123	CDS	GGACA	29	0.607143	0.999988	YES	YES	hsa-miR-210-3p
OGFR	NC_000020.11	62804835	62814000	+	NM_007346.4	1969	62813559	CDS	GGACC	36	0.228571	0.999922	YES	YES	NO
OGFR	NC_000020.11	62804835	62814000	+	NM_007346.4	2158	62813748	3' UTR	TGACC	36	0.257143	0.999934	YES	NO	hsa-miR-183-5p
OGFR	NC_000020.11	62804835	62814000	+	NM_007346.4	2165	62813755	3' UTR	TGACC	44	0.25	0.999938	YES	NO	NO
OGFR	NC_000020.11	62804835	62814000	+	NM_007346.4	789	62812379	CDS	GGACT	13	0.666667	0.999985	YES	YES	NO
ATF6	NC_000001.11	161766320	161964070	+	NM_007348.4	2097	161958697	3' UTR	CCAGA	13	0.923077	0.999933	NO	NO	hsa-miR-34a-5p hsa-miR-199a-5p hsa-miR-424-5p hsa-miR-503-5p
TARDBP	NC_000001.11	11012654	11025492	+	NM_007375.4	1657	11022964	3' UTR	GGACT	36	0.818182	0.999991	YES	YES	hsa-miR-193a-3p hsa-miR-182-5p hsa-miR-224-5p hsa-miR-182-5p
TARDBP	NC_000001.11	11012654	11025492	+	NM_007375.4	1752	11023059	3' UTR	GGATT	46	0.409091	0.999919	NO	NO	NO
TARDBP	NC_000001.11	11012654	11025492	+	NM_007375.4	2333	11023640	3' UTR	GGACA	42	0.625	0.999931	YES	YES	NO
TARDBP	NC_000001.11	11012654	11025492	+	NM_007375.4	2353	11023660	3' UTR	AGACT	65	0.459016	0.999931	YES	YES	NO
TARDBP	NC_000001.11	11012654	11025492	+	NM_007375.4	2535	11023842	3' UTR	GGACT	70	0.612903	0.999973	YES	YES	NO
PUDP	NC_000023.11	7048920	7148153	-	NM_012080.5	904	7050119	3' UTR	TGACT	9	0.75	0.999963	YES	YES	NO
FRAT2	NC_000010.11	97332497	97334729	-	NM_012083.3	1119	97333611	3' UTR	GGACC	9	1	0.999957	YES	YES	NO
FRAT2	NC_000010.11	97332497	97334729	-	NM_012083.3	1450	97333280	3' UTR	GGACT	9	0.875	0.999924	YES	YES	NO
PGLS	NC_000019.10	17511649	17521288	+	NM_012088.3	977	17521257	3' UTR	GGACA	118	0.387931	0.999959	YES	YES	NO
PGLS	NC_000019.10	17511649	17521288	+	NM_012088.3	342	17516202	CDS	CCAGA	55	0.941176	0.999944	NO	NO	NO
ARL2BP	NC_000016.10	57245259	57253635	+	NM_012106.4	690	57252356	3' UTR	AGACT	18	0.764706	0.999917	YES	YES	hsa-miR-423-3p
TPX2	NC_000020.11	31739290	31801800	+	NM_012112.5	2907	31801234	3' UTR	GGACT	21	0.857143	0.999989	YES	YES	hsa-miR-139-5p hsa-miR-320a-3p hsa-miR-320b hsa-miR-320c
CDC42EP4	NC_000017.11	73283624	73312001	-	NM_012121.5	3083	73283639	3' UTR	AAAAA	10	0.8	0.999925	NO	NO	NO
DTYMK	NC_000002.12	241675747	241686815	-	NM_012145.4	376	241678636	CDS	AGATT	40	1	0.999994	NO	NO	NO
DTYMK	NC_000002.12	241675747	241686815	-	NM_012145.4	872	241675926	3' UTR	GGACA	51	0.647059	0.999951	YES	YES	hsa-miR-23a-3p
F8A1	NC_000023.11	154886355	154888061	+	NM_012151.4	1065	154887419	CDS	TGACT	25	0.6	0.999901	YES	NO	NO
F8A1	NC_000023.11	154886355	154888061	+	NM_012151.4	1157	154887511	3' UTR	TGACT	26	0.857143	0.999962	YES	NO	NO
F8A1	NC_000023.11	154886355	154888061	+	NM_012151.4	1179	154887533	3' UTR	GGACT	25	0.904762	0.999976	YES	YES	hsa-miR-17-5p hsa-miR-19a-3p hsa-miR-19b-3p hsa-miR-19a-3p hsa-miR-19b-3p hsa-miR-17-5p
F8A1	NC_000023.11	154886355	154888061	+	NM_012151.4	1380	154887734	3' UTR	GGACA	30	0.448276	0.99995	YES	YES	NO
FBXO7	NC_000022.11	32474811	32498829	+	NM_012179.4	2047	32498816	3' UTR	AAAAA	55	0.846154	0.999916	NO	NO	NO
FBXO7	NC_000022.11	32474811	32498829	+	NM_012179.4	327	32478993	CDS	CGATT	34	0.818182	0.999984	NO	NO	NO
FBXO7	NC_000022.11	32474811	32498829	+	NM_012179.4	407	32479073	CDS	GGACT	39	0.692308	0.999983	YES	YES	hsa-miR-26b-5p hsa-miR-26a-5p
TIMM10B	NC_000011.10	6481501	6484681	+	NM_012192.4	364	6482257	3' UTR	GGACC	25	0.375	0.999988	YES	YES	NO
TIMM10B	NC_000011.10	6481501	6484681	+	NM_012192.4	380	6482273	3' UTR	GGACC	24	0.47619	0.999916	YES	YES	NO
TIMM10B	NC_000011.10	6481501	6484681	+	NM_012192.4	389	6482282	3' UTR	GGACC	21	0.736842	0.999997	YES	YES	NO
NUBP2	NC_000016.10	1782960	1789186	+	NM_012225.4	1188	1789025	3' UTR	GGACT	65	0.338983	0.999959	YES	YES	NO
NUBP2	NC_000016.10	1782960	1789186	+	NM_012225.4	1259	1789096	3' UTR	GGAGT	29	0.916667	0.999982	NO	NO	NO
[truncated: 1,778 more rows]
